# Supplementary material for: Axially chiral N-alkyl-N-cinnamoyl amide type P,olefin ligands for Pd-catalyzed reactions
Source: Royal Society of Chemistry journal article supplement (doi:10.1039/d3ob00224a), 2023-01-01
Supplement: d3ob00224a1.pdf [file d3ob00224a1.pdf]

## Supporting Information

for

### **Axially chiral *N*-alkyl-*N*-cinnamoyl amide type *P*,olefin ligands for Pd-catalyzed reactions**

Takashi Mino, <sup>a,b,c,\*</sup> Kaho Takaya, ‡<sup>a</sup> Kaito Koki, ‡<sup>a</sup> Natsume Akimoto, ‡<sup>a</sup> Yasushi Yoshida, <sup>a,b,c</sup> Yoshio Kasashima <sup>d</sup> and Masami Sakamoto <sup>a,b</sup>

<sup>a</sup> *Graduate School of Engineering, Chiba University, 1-33, Yayoi-cho, Inage-ku, Chiba 263-8522, Japan*

<sup>b</sup> *Molecular Chirality Research Center, Chiba University, 1-33, Yayoi-cho, Inage-ku, Chiba 263-8522, Japan*

<sup>c</sup> *Soft Molecular Activation Research Center, Chiba University, 1-33, Yayoi-cho, Inage-ku, Chiba 263-8522, Japan*

<sup>d</sup> *Education Center, Chiba Institute of Technology, Shibazono 2-2-1, Narashino, Chiba 275-0023, Japan*

‡ These authors contributed equally to this work.

tmino@faculty.chiba-u.jp

## Table of Contents

|                                                                                                                    |         |
|--------------------------------------------------------------------------------------------------------------------|---------|
| General methods and materials.....                                                                                 | S3      |
| Experimental procedures and characterization data.....                                                             | S4-16   |
| Data of thermal racemization of <b>1b</b> and <b>1c</b> .....                                                      | S17-18  |
| <sup>1</sup> H, <sup>13</sup> C, and <sup>31</sup> P NMR spectra of <b>3a-c</b> .....                              | S19-27  |
| <sup>1</sup> H, <sup>13</sup> C, and <sup>31</sup> P NMR spectra, and chiral phase HPLC chart of <b>1a-c</b> ..... | S28-71  |
| <sup>1</sup> H and <sup>13</sup> C NMR spectra, and chiral phase HPLC chart of <b>4</b> .....                      | S72-123 |

## General methods and materials

Melting point was measured by a melting point instrument and was uncorrected. NMR spectra were recorded with 300, 400 and 500 MHz spectrometers in CDCl<sub>3</sub> as a solvent at room temperature unless otherwise noted. Chemical shifts ( $\delta$ ) are given in ppm relative to TMS (<sup>1</sup>H), external 85% H<sub>3</sub>PO<sub>4</sub> (<sup>31</sup>P), or residual CHCl<sub>3</sub> (<sup>13</sup>C) as a reference. All <sup>13</sup>C and <sup>31</sup>P NMR spectra recorded with the use of broadband proton decoupling. The coupling constants *J* are given in Hz, and the peak patterns are indicated as follows: s, singlet; d, doublet, t, triplet; q, quartet; m, multiplet. HRMS (ESI) was measured with an orbitrap mass spectrometer. Optical rotation was measured on a polarimeter. The enantiomeric excess value was determined by HPLC equipped with a chiral stationary phase column. Unless otherwise noted, all reagents were used without further purification.

### Preparation of Aminophosphine 3a.

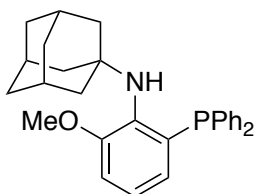

To a mixture of phosphine oxide **2a** (1.37 g, 3.0 mmol) and triethylamine (6.3 mL, 45 mmol) in *m*-xylene (30 mL) was added trichlorosilane (3.0 mL, 30 mmol) at 0 °C under an Ar atmosphere. The mixture was stirred at 120 °C for 24 h. After being cooled to room temperature, the reaction mixture was diluted with CHCl<sub>3</sub> and quenched with 2 M of NaOH aq. solution. The organic layer was washed with brine, dried over MgSO<sub>4</sub>, and concentrated under reduced pressure. The residue was purified by silica gel chromatography (hexane:EtOAc = 40:1).

*N*-(2-(Diphenylphosphaneyl)-6-methoxyphenyl)adamantan-1-amine (**3a**). 43% yield (0.761 g, 1.72 mmol) as a white solid; mp 173-175 °C; <sup>1</sup>H NMR (400 MHz, CDCl<sub>3</sub>)  $\delta$  7.33-7.25 (m, 10H), 6.89-6.82 (m, 2H), 6.43 (qd, *J* = 1.9 and 7.1 Hz, 1H), 3.823 (s, 4H), 3.819 (br-s, 1H), 1.96 (s, 3H), 1.79 (d, *J* = 2.5 Hz, 6H), 1.53 (dd, *J* = 12.1 and 25.5 Hz, 6H); <sup>13</sup>C NMR (75 MHz, CDCl<sub>3</sub>)  $\delta$  154.0 (d, *J*<sub>CP</sub> = 5.0 Hz), 139.8 (d, *J*<sub>CP</sub> = 23.8 Hz), 136.6 (d, *J*<sub>CP</sub> = 10.0 Hz)  $\times$  2, 133.8 (d, *J*<sub>CP</sub> = 19.4 Hz)  $\times$  4, 132.0 (d, *J*<sub>CP</sub> = 4.4 Hz), 128.5 (d, *J*<sub>CP</sub> = 3.3 Hz)  $\times$  4, 128.4  $\times$  2, 122.7 (d, *J*<sub>CP</sub> = 1.1 Hz), 126.1, 111.5, 54.9, 54.6 (d, *J*<sub>CP</sub> = 18.2 Hz), 43.6 (d, *J*<sub>CP</sub> = 2.2 Hz)  $\times$  3, 36.4  $\times$  3, 30.2  $\times$  3; <sup>31</sup>P NMR (121 MHz, CDCl<sub>3</sub>)  $\delta$  -18.4; HRMS (ESI-orbitrap) *m/z* calcd for C<sub>29</sub>H<sub>32</sub>ONP + H 442.2294 found 442.2282; EI-MS *m/z* (rel intensity) 441 (M<sup>+</sup>, 100).

### Preparation of Aminophosphine 3b.

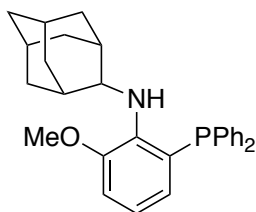

To a mixture of phosphine oxide **2b** (0.229 g, 0.50 mmol) and triethylamine (0.51 mL, 5.0 mmol) in *m*-xylene (2.5 mL) was added trichlorosilane (3.0 mL, 30 mmol) at 0 °C under an Ar atmosphere. The mixture was stirred at 120 °C for 24 h. After being cooled to room temperature, the reaction mixture was diluted with CHCl<sub>3</sub> and quenched with 2 M of NaOH aq. solution. The organic layer was washed with brine, dried over MgSO<sub>4</sub>, and concentrated under reduced pressure. The residue was purified by silica gel chromatography (hexane:EtOAc = 40:1).

*N*-(2-(Diphenylphosphaneyl)-6-methoxyphenyl)adamantan-2-amine (**3b**). 48% yield (0.106 g, 0.239 mmol) as a white solid; mp 117-119 °C; <sup>1</sup>H NMR (400 MHz, CDCl<sub>3</sub>) δ 7.33-7.28 (m, 10H), 6.81 (dd, *J* = 1.5 and 8.0 Hz, 1H), 6.73 (t, *J* = 7.7 Hz, 1H), 6.48 (ddd, *J* = 1.5, 4.3 and 7.7 Hz, 1H), 4.91 (s, 1H), 3.83 (s, 3H), 3.72 (s, 1H), 2.02 (d, *J* = 12.8 Hz, 2H), 1.83 (s, 2H), 1.79 (s, 1H), 1.70-1.65 (m, 5H), 1.44 (dd, *J* = 12.5 and 27.8 Hz, 4H); <sup>13</sup>C NMR (101 MHz, CDCl<sub>3</sub>) δ 150.8 (d, *J*<sub>CP</sub> = 6.6 Hz), 142.3 (d, *J*<sub>CP</sub> = 23.5 Hz), 137.1 × 2 (d, *J*<sub>CP</sub> = 9.5 Hz), 133.7 × 2 (d, *J*<sub>CP</sub> = 19.1 Hz), 128.4 × 4, 128.3 × 4, 125.5 (d, *J*<sub>CP</sub> = 9.5 Hz), 119.95, 119.93, 111.7, 61.6 (d, *J*<sub>CP</sub> = 8.1 Hz), 55.7, 37.8, 37.5 × 2, 32.5 × 2, 31.4 (d, *J*<sub>CP</sub> = 2.2 Hz) × 2, 27.44, 27.43; <sup>31</sup>P NMR (121 MHz, CDCl<sub>3</sub>) δ -18.3; HRMS (ESI-orbitrap) *m/z* calcd for C<sub>29</sub>H<sub>32</sub>ONP + H 442.2294 found 442.2286; EI-MS *m/z* (rel intensity) 441 (M<sup>+</sup>, 100).

#### Preparation of Aminophosphine **3c**.

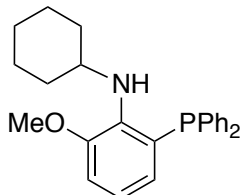

To a mixture of phosphine oxide **2c** (0.405 g, 1.0 mmol) and triethylamine (2.1 mL, 15 mmol) in *m*-xylene (20 mL) was added trichlorosilane (1.0 mL, 10 mmol) at 0 °C under an Ar atmosphere. The mixture was stirred at 120 °C for 24 h. After being cooled to room temperature, the reaction mixture was diluted with CHCl<sub>3</sub> and quenched with 2 M of NaOH aq. solution. The organic layer was washed with brine, dried over MgSO<sub>4</sub>, and concentrated under reduced pressure. The residue was purified by silica gel chromatography (hexane:EtOAc = 40:1).

*N*-(2-(Diphenylphosphaneyl)-6-methoxyphenyl)cyclohexylamine (**3c**). 94% yield (0.366 g, 0.939 mmol) as a white solid; mp 96-98 °C; <sup>1</sup>H NMR (400 MHz, CDCl<sub>3</sub>) δ 7.32-7.27 (m, 10H), 6.81 (dd, *J* = 1.5 and 8.0 Hz, 1H), 6.76 (t, *J* = 7.7 Hz, 1H), 6.47 (ddd, *J* = 1.5, 4.3 and 7.5 Hz, 1H), 4.18 (br-s, 1H), 3.82 (s, 3H), 3.39 (sep, *J* = 3.5 Hz, 1H), 1.83-1.81 (m, 2H), 1.60-1.56 (m, 2H), 1.48-1.46 (m, 1H) 1.05-0.98 (m, 5H); <sup>13</sup>C NMR (101 MHz, CDCl<sub>3</sub>) δ 151.2 (d, *J*<sub>CP</sub> = 5.9 Hz), 141.9 (d, *J*<sub>CP</sub> = 23.5 Hz), 137.0 (d, *J*<sub>CP</sub> = 9.5 Hz) × 2, 133.7 (d, *J*<sub>CP</sub> = 19.1 Hz) × 4, 128.41 × 2, 128.38 (d, *J*<sub>CP</sub> = 6.6 Hz) × 4, 127.1, 126.6 (d, *J*<sub>CP</sub> = 8.8 Hz), 120.7 (d, *J*<sub>CP</sub> = 2.2 Hz), 111.6, 56.4 (d, *J*<sub>CP</sub> = 6.6 Hz), 55.6, 34.2 × 2, 25.9, 25.1 × 2; <sup>31</sup>P NMR (121 MHz, CDCl<sub>3</sub>) δ -19.7; HRMS (ESI-orbitrap) *m/z* calcd for C<sub>25</sub>H<sub>28</sub>ONP + H 390.1981 found 390.1979; EI-MS *m/z* (rel intensity) 389 (M<sup>+</sup>, 21).

#### Preparation of Cinnamoyl Amide (±)-1a.

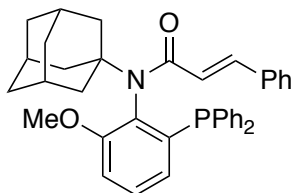

To the solution of aminophosphine **3a** (0.221 g, 0.50 mmol) in THF (13 mL) was added pyridine (0.078 mL, 1.0 mmol), *N,N*-dimethyl-4-aminopyridine (26 mg, 0.20 mmol) and cinnamoyl chloride (0.167 g, 1.0 mmol) at room temperature. The reaction mixture was stirred at 60 °C. After 48 h, the mixture was quenched with water and diluted with diethyl ether. The organic layer was washed with water and brine, and dried over MgSO<sub>4</sub>. The filtrate was concentrated and the residue was purified by column chromatography (hexane:EtOAc = 4:1).

(±)-*N*-(Adamantan-1-yl)-*N*-(2-(diphenylphosphaneyl)-6-methoxyphenyl)cinnamamide ((±)-**1a**). 88% yield (252 mg, 0.44 mmol) as a white solid; mp 100-102 °C; <sup>1</sup>H NMR (400 MHz, CDCl<sub>3</sub>) δ 7.39 (d, *J* = 15.5 Hz 1H), 7.35-7.29 (m, 5H), 7.26 (s, 1H), 7.24-7.19 (m, 3H), 7.16-7.12 (m, 2H), 7.07-6.98 (m, 5H), 6.96 (dd, *J* = 1.3 and 8.3 Hz, 1H), 6.82 (qd, *J* = 1.2 and 7.7 Hz, 1H), 5.71 (q, *J* = 15.5 Hz 1H), 3.81 (s, 3H), 2.28-2.33 (m, 6H), 1.96 (s, 3H), 1.53 (s, 6H); <sup>13</sup>C NMR (101 MHz, CDCl<sub>3</sub>) δ 166.5, 157.3 (d, *J*<sub>CP</sub> = 24.0 Hz), 141.4 (d, *J*<sub>CP</sub> = 52.0 Hz), 139.8, 136.7 (d, *J*<sub>CP</sub> = 39.9 Hz), 136.4 (d, *J*<sub>CP</sub> = 38.3 Hz), 135.5, 135.4 (d, *J*<sub>CP</sub> = 112.3 Hz), 134.0 (d, *J*<sub>CP</sub> = 84.6 Hz) × 2, 133.7 (d, *J*<sub>CP</sub> = 78.0 Hz) × 2, 128.9, 128.8, 128.6, 128.49 (d, *J*<sub>CP</sub> = 25.5 Hz) × 2, 128.46, 128.32 (d, *J*<sub>CP</sub> = 28.4 Hz) × 2, 128.30 × 2, 127.7 × 2, 127.2 (d, *J*<sub>CP</sub> = 6.0 Hz), 122.1, 111.9, 61.1, 55.6, 39.6 (d, *J*<sub>CP</sub> = 3.7 Hz) × 3, 36.5 × 3, 30.3 × 3; <sup>31</sup>P NMR (121 MHz, CDCl<sub>3</sub>) δ -17.8; HRMS (ESI-orbitrap) *m/z* calcd for C<sub>38</sub>H<sub>38</sub>O<sub>2</sub>NP + H 572.2713 found 572.2705; EI-MS *m/z* (rel intensity) 571 (M<sup>+</sup>,

1); HPLC (Daicel CHIRALCEL<sup>®</sup> OD-H, 0.46×25 cm, UV 254 nm, hexane : 2-propanol = 98 : 2, 0.8 mL/min)  $t_R = 11.9$  min (CD :  $\lambda_{\text{ext}} (\Delta\epsilon)$  254 (-)),  $t_R = 16.2$  min (CD :  $\lambda_{\text{ext}} (\Delta\epsilon)$  254 (+)).

#### Preparation of Cinnamoyl Amide ( $\pm$ )-1b.

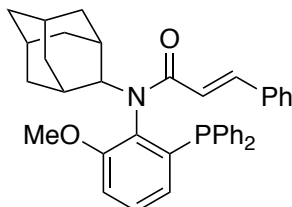

To the solution of aminophosphine **3b** (0.132 g, 0.30 mmol) in THF (8.0 mL) was added pyridine (0.048 mL, 0.60 mmol), *N,N*-dimethyl-4-aminopyridine (16 mg, 0.13 mmol) and cinnamoyl chloride (0.100 g, 0.6 mmol) at room temperature. The reaction mixture was stirred at 60 °C. After 48 h, the mixture was quenched with water and diluted with diethyl ether. The organic layer was washed with water and brine, and dried over MgSO<sub>4</sub>. The filtrate was concentrated and the residue was purified by column chromatography (hexane:EtOAc = 4:1).

( $\pm$ )-*N*-(Adamantan-2-yl)-*N*-(2-(diphenylphosphaneyl)-6-methoxyphenyl)cinnamamide (( $\pm$ )-**1b**). 92% yield (157 mg, 0.28 mmol) as a white solid; mp 184-196 °C; <sup>1</sup>H NMR (400 MHz, CDCl<sub>3</sub>)  $\delta$  7.36-7.27 (m, 5H), 7.25-7.13 (m, 7H), 7.00-6.94 (m, 6H), 6.86 (qd,  $J = 2.7$  and 7.7 Hz, 1H), 5.74 (d,  $J = 15.3$  Hz, 1H), 4.71 (s, 1H), 3.84 (s, 3H), 2.76 (s, 1H), 2.23-2.16 (m, 2H), 2.04 (d,  $J = 12.1$  Hz, 1H), 1.85-1.79 (m, 3H), 1.72-1.64 (m, 4H), 1.44 (t,  $J = 14.7$  Hz, 2H), 1.20 (d,  $J = 14.4$  Hz, 1H); <sup>13</sup>C NMR (101 MHz, CDCl<sub>3</sub>)  $\delta$  167.5, 157.2 (d,  $J_{\text{CP}} = 6.6$  Hz), 139.8, 135.6, 134.6 × 2 (d,  $J_{\text{CP}} = 22.0$  Hz), 133.4 (d,  $J_{\text{CP}} = 27.6$  Hz), 133.2 × 2 (d,  $J_{\text{CP}} = 19.2$  Hz), 129.3, 128.9, 128.7, 128.4 × 2 (d,  $J_{\text{CP}} = 6.0$  Hz), 128.3, 128.2, 128.1 × 4, 127.6 × 4, 126.7 (d,  $J_{\text{CP}} = 2.2$  Hz), 120.5, 112.2, 63.4 (d,  $J_{\text{CP}} = 6.6$  Hz), 55.4, 38.8, 37.9, 37.8, 31.9 (d,  $J_{\text{CP}} = 2.2$  Hz), 31.4, 30.8 (d,  $J_{\text{CP}} = 6.6$  Hz), 30.3, 27.8, 27.0; <sup>31</sup>P NMR (121 MHz, CDCl<sub>3</sub>)  $\delta$  -16.2; HRMS (ESI-orbitrap)  $m/z$  calcd for C<sub>38</sub>H<sub>38</sub>O<sub>2</sub>NP + H 572.2713 found 572.2711; EI-MS  $m/z$  (rel intensity) 571 (M<sup>+</sup>, 0.4); HPLC (Daicel CHIRALPAC<sup>®</sup> IA, 0.46×25 cm, UV 270 nm, hexane : 2-propanol = 98 : 2, 1.0 mL/min)  $t_R = 15.0$  min (CD :  $\lambda_{\text{ext}} (\Delta\epsilon)$  254 (-)),  $t_R = 20.4$  min (CD :  $\lambda_{\text{ext}} (\Delta\epsilon)$  254 (+)).

#### Preparation of Cinnamoyl Amide ( $\pm$ )-1c.

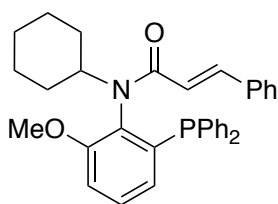

To the solution of aminophosphine **3c** (0.312 g, 0.80 mmol) in THF (20 mL) was added pyridine (0.13 mL, 1.6 mmol), *N,N*-dimethyl-4-aminopyridine (26 mg, 0.20 mmol) and cinnamoyl chloride (0.267 g, 1.6 mmol) at room temperature. The reaction mixture was stirred at 60 °C. After 48 h, the mixture was quenched with water and diluted with diethyl ether. The organic layer was washed with water and brine, and dried over MgSO<sub>4</sub>. The filtrate was concentrated and the residue was purified by column chromatography (hexane:EtOAc = 4:1).

(±)-*N*-(Cyclohexyl)-*N*-(2-(diphenylphosphanyl)-6-methoxyphenyl)cinnamamide ((±)-**1c**). 99% yield (412 mg, 0.79 mmol) as a white solid; mp 175-177 °C; <sup>1</sup>H NMR (400 MHz, CDCl<sub>3</sub>) δ 7.38 (d, *J* = 15.5 Hz, 1H), 7.33-7.26 (m, 6H), 7.24-7.18 (m 4H), 7.10-7.02 (m, 5H), 6.95 (dd, *J* = 1.2 and 8.3 Hz, 1H), 6.84 (ddd, *J* = 1.3, 2.7 and 7.7 Hz, 1H), 5.70 (d, *J* = 15.6 Hz, 1H), 4.11 (tt, *J* = 3.5 and 11.6 Hz, 1H), 3.75 (s, 3H), 2.13 (t, *J* = 13.9 Hz, 2H), 1.73-1.63 (m, 3H), 1.57-1.42 (m, 3H), 1.33-1.22 (m, 2H) 0.98 (tq, *J* = 3.7 and 13.0 Hz, 1H); <sup>13</sup>C NMR (101 MHz, CDCl<sub>3</sub>) δ 166.9, 156.9 (d, *J*<sub>CP</sub> = 5.9 Hz), 141.0 (d, *J*<sub>CP</sub> = 13.9 Hz), 140.0, 137.0 (d, *J*<sub>CP</sub> = 13.2 Hz), 135.7 (d, *J*<sub>CP</sub> = 13.2 Hz), 135.4, 134.303 (d, *J*<sub>CP</sub> = 27.3 Hz) × 2, 134.296 (d, *J*<sub>CP</sub> = 21.6 Hz) × 2, 133.2 (d, *J*<sub>CP</sub> = 19.1 Hz) × 2, 129.1, 128.8 (d, *J*<sub>CP</sub> = 2.9 Hz) × 2, 128.4 (d, *J*<sub>CP</sub> = 2.0 Hz) × 2, 128.29 × 2, 128.22, 128.16 × 2, 127.6 × 2, 126.7 (d, *J*<sub>CP</sub> = 1.5 Hz), 120.4, 112.2, 59.4, 55.5, 30.9 (d, *J*<sub>CP</sub> = 7.3 Hz), 30.6 (d, *J*<sub>CP</sub> = 2.2 Hz), 26.1, 26.0, 25.9; <sup>31</sup>P NMR (121 MHz, CDCl<sub>3</sub>) δ -17.4; HRMS (ESI-orbitrap) *m/z* calcd for C<sub>34</sub>H<sub>34</sub>O<sub>2</sub>NP + H 520.2400 found 520. 2397; EI-MS *m/z* (rel intensity) 519 (M<sup>+</sup>, 6); HPLC (Daicel CHIRALCEL<sup>®</sup> OD-H, 0.46×25 cm, UV 270 nm, hexane : 2-propanol = 98 : 2, 1.0 mL/min) *t*<sub>R</sub> = 15.1 min (CD : λ<sub>ext</sub> (Δε) 254 (-)), *t*<sub>R</sub> = 18.6 min (CD : λ<sub>ext</sub> (Δε) 254 (+)).

#### Optical Resolution of (±)-**1a**.

HPLC resolution of (±)-**1a** (49.1 mg, 0.086 mmol) dissolved in hexane (10 mL) was carried out by successive injections of 2 mL on a CHIRALCEL<sup>®</sup> OD (1.0×25 cm) and CHIRALCEL<sup>®</sup> OD-H (1.0×25 cm). A solution of hexane : 2-propanol = 98 : 2 was used as the eluent working at a flow rate of 1.8 mL/min and with UV monitoring at 254 nm. (-)-**1a** and (+)-**1a** were obtained by concentration of fractions respectively.

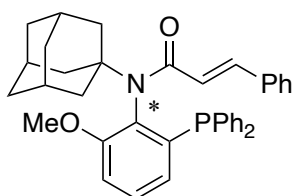

(-)-*N*-(Adamantan-1-yl)-*N*-(2-(diphenylphosphaneyl)-6-methoxyphenyl)cinnamamide ((-)-**1a**). 28% yield (13.7 mg, 0.024 mmol) as a white solid; mp 100-102 °C; 99% ee;  $[\alpha]_D^{20}$  -37.0 (*c* 0.23, CHCl<sub>3</sub>); <sup>1</sup>H NMR (300 MHz, CDCl<sub>3</sub>)  $\delta$  7.40 (d, *J* = 15.5 Hz 1H), 7.35-7.26 (m, 6H), 7.24-7.19 (m, 3H), 7.16-7.12 (m, 2H), 7.07-6.98 (m, 5H), 6.96 (dd, *J* = 1.3 and 8.3 Hz, 1H), 6.82 (qd, *J* = 1.2 and 7.7 Hz, 1H), 5.71 (q, *J* = 15.5 Hz 1H), 3.81 (s, 3H), 2.33-2.28 (m, 6H), 1.96 (s, 3H), 1.53 (s, 6H); <sup>13</sup>C NMR (75 MHz, CDCl<sub>3</sub>)  $\delta$  166.5, 157.3 (d, *J*<sub>CP</sub> = 24.0 Hz), 141.4 (d, *J*<sub>CP</sub> = 52.0 Hz), 139.8, 136.7 (d, *J*<sub>CP</sub> = 39.9 Hz), 136.4 (d, *J*<sub>CP</sub> = 38.3 Hz), 135.7, 135.4 (d, *J*<sub>CP</sub> = 112.3 Hz), 134.0 (d, *J*<sub>CP</sub> = 84.6 Hz)  $\times$  2, 133.7 (d, *J*<sub>CP</sub> = 78.0 Hz)  $\times$  2, 128.9, 128.8, 128.6, 128.50 (d, *J*<sub>CP</sub> = 25.5 Hz)  $\times$  2, 128.46, 128.33 (d, *J*<sub>CP</sub> = 28.4 Hz)  $\times$  2, 128.31  $\times$  2, 127.7  $\times$  2, 127.2 (d, *J*<sub>CP</sub> = 6.0 Hz), 122.1, 111.9, 61.1, 55.6, 39.6 (d, *J*<sub>CP</sub> = 3.7 Hz)  $\times$  3, 36.6  $\times$  3, 30.3  $\times$  3; <sup>31</sup>P NMR (121 MHz, CDCl<sub>3</sub>)  $\delta$  -17.9; HRMS (ESI-orbitrap) *m/z* calcd for C<sub>38</sub>H<sub>38</sub>O<sub>2</sub>NP + H 572.2713 found 572.2706; EI-MS *m/z* (rel intensity) 571 (M<sup>+</sup>, 1); HPLC (Daicel CHIRALCEL<sup>®</sup> OD-H, 0.46 $\times$ 25 cm, UV 254 nm, hexane : 2-Propanol = 98 : 2, 1.0 mL/min) *t*<sub>R</sub> (major) = 10.7 min (CD :  $\lambda_{\text{ext}}$  ( $\Delta\epsilon$ ) 254 (-)), *t*<sub>R</sub> (minor) = 16.4 min (CD :  $\lambda_{\text{ext}}$  ( $\Delta\epsilon$ ) 254 (+)).

(+)-*N*-(Adamantan-1-yl)-*N*-(2-(diphenylphosphaneyl)-6-methoxyphenyl)cinnamamide ((+)-**1a**). 33% yield (16.2 mg, 0.028 mmol) as a white solid; mp 100-102 °C; 99% ee;  $[\alpha]_D^{20}$  41.6 (*c* 0.53, CHCl<sub>3</sub>); <sup>1</sup>H NMR (300 MHz, CDCl<sub>3</sub>)  $\delta$  7.40 (d, *J* = 15.5 Hz 1H), 7.35-7.29 (m, 6H), 7.24-7.19 (m, 3H), 7.16-7.11 (m, 2H), 7.08-6.99 (m, 5H), 6.96 (dd, *J* = 1.3 and 8.3 Hz, 1H), 6.81 (qd, *J* = 1.2 and 7.7 Hz, 1H), 5.72 (q, *J* = 15.5 Hz 1H), 3.81 (s, 3H), 2.33-2.28 (m, 6H), 1.96 (s, 3H), 1.53 (s, 6H); <sup>13</sup>C NMR (75 MHz, CDCl<sub>3</sub>)  $\delta$  166.5, 157.3 (d, *J*<sub>CP</sub> = 24.0 Hz), 141.4 (d, *J*<sub>CP</sub> = 52.0 Hz), 139.8, 136.7 (d, *J*<sub>CP</sub> = 39.9 Hz), 136.4 (d, *J*<sub>CP</sub> = 38.3 Hz), 135.7, 135.3 (d, *J*<sub>CP</sub> = 112.3 Hz), 134.0 (d, *J*<sub>CP</sub> = 84.6 Hz)  $\times$  2, 133.7 (d, *J*<sub>CP</sub> = 78.0 Hz)  $\times$  2, 128.9, 128.8, 128.6, 128.49 (d, *J*<sub>CP</sub> = 25.5 Hz)  $\times$  2, 128.47, 128.33 (d, *J*<sub>CP</sub> = 28.4 Hz)  $\times$  2, 128.31  $\times$  2, 127.7  $\times$  2, 127.2 (d, *J*<sub>CP</sub> = 6.0 Hz), 122.1, 111.9, 61.1, 55.6, 39.6 (d, *J*<sub>CP</sub> = 3.7 Hz)  $\times$  3, 36.6  $\times$  3, 30.3  $\times$  3; <sup>31</sup>P NMR (121 MHz, CDCl<sub>3</sub>)  $\delta$  -17.9; HRMS (ESI-orbitrap) *m/z* calcd for C<sub>38</sub>H<sub>38</sub>O<sub>2</sub>NP + H 572.2713 found 572.2704; EI-MS *m/z* (rel intensity) 571 (M<sup>+</sup>, 1); HPLC (Daicel CHIRALCEL<sup>®</sup> OD-H, 0.46 $\times$ 25 cm, UV



254 nm, hexane : 2-Propanol = 98 : 2, 1.0 mL/min)  $t_R$  (minor) = 10.7 min (CD :  $\lambda_{\text{ext}}$  ( $\Delta\epsilon$ ) 254 (-)),  $t_R$  (major) = 14.9 min (CD :  $\lambda_{\text{ext}}$  ( $\Delta\epsilon$ ) 254 (+)).

### Optical Resolution of ( $\pm$ )-**1b**.

HPLC resolution of ( $\pm$ )-**1b** (74.8 mg, 0.131 mmol) dissolved in hexane (40 mL) was carried out by successive injections of 2 mL on a CHIRALPAC<sup>®</sup> IA (1.0×25 cm). A solution of hexane : 2-propanol = 98 : 2 was used as the eluent working at a flow rate of 1.5 mL/min and with UV monitoring at 270 nm. (+)-**1b** and (-)-**1b** were obtained by concentration of fractions respectively.

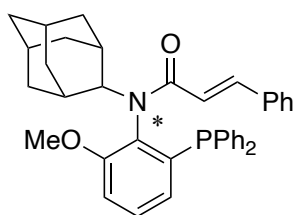

(+)-*N*-(Adamantan-2-yl)-*N*-(2-(diphenylphosphaneyl)-6-

*methoxyphenyl)cinnamamide* ((+)-**1b**). 14% yield (10.5 mg, 0.018 mmol) as a white solid; mp 184-186 °C; 99% ee;  $[\alpha]_{\text{D}}^{20}$  96.9 (*c* 1.05, CHCl<sub>3</sub>); <sup>1</sup>H NMR (300 MHz, CDCl<sub>3</sub>)  $\delta$  7.36-7.27 (m, 5H), 7.24-7.13 (m, 7H), 7.00-6.94 (m, 6H), 6.86 (qd, *J* = 2.7 and 7.7 Hz, 1H), 5.74 (d, *J* = 15.3 Hz, 1H), 4.71 (s, 1H), 3.83 (s, 3H), 2.76 (s, 1H), 2.23-2.16 (m, 2H), 2.04 (d, *J* = 12.1 Hz, 1H), 1.85-1.80 (m, 3H), 1.73-1.63 (m, 4H), 1.44 (t, *J* = 14.7 Hz, 2H), 1.20 (d, *J* = 14.4 Hz, 1H); <sup>13</sup>C NMR (101 MHz, CDCl<sub>3</sub>)  $\delta$  167.5, 157.2 (d, *J*<sub>CP</sub> = 6.6 Hz), 139.8, 135.6, 134.6 × 2 (d, *J*<sub>CP</sub> = 22.0 Hz), 133.3 (d, *J*<sub>CP</sub> = 27.6 Hz), 133.13 × 2 (d, *J*<sub>CP</sub> = 19.2 Hz), 129.3, 128.9, 128.7, 128.4 × 2 (d, *J*<sub>CP</sub> = 6.0 Hz), 128.3, 128.23, 128.16 × 4, 127.6 × 4, 126.7 (d, *J*<sub>CP</sub> = 2.2 Hz), 120.5, 112.2, 63.4 (d, *J*<sub>CP</sub> = 6.6 Hz), 55.4, 38.8, 37.90, 37.86, 31.9 (d, *J*<sub>CP</sub> = 2.2 Hz), 31.4, 30.8 (d, *J*<sub>CP</sub> = 6.6 Hz), 30.3, 27.8, 27.0; <sup>31</sup>P NMR (121 MHz, CDCl<sub>3</sub>)  $\delta$  -16.1; HRMS (ESI-orbitrap) *m/z* calcd for C<sub>38</sub>H<sub>38</sub>O<sub>2</sub>NP + H 572.2713 found 572.2712; EI-MS *m/z* (rel intensity) 571 (M<sup>+</sup>, 7); HPLC (Daicel CHIRALPAC<sup>®</sup> IA, 0.46×25 cm, UV 270 nm, hexane : 2-Propanol = 98 : 2, 1.5 mL/min)  $t_R$  (major) = 14.7 min (CD :  $\lambda_{\text{ext}}$  ( $\Delta\epsilon$ ) 254 (-)),  $t_R$  (minor) = 20.6 min (CD :  $\lambda_{\text{ext}}$  ( $\Delta\epsilon$ ) 254 (+)).

(-)-*N*-(Adamantan-2-yl)-*N*-(2-(diphenylphosphaneyl)-6-methoxyphenyl)cinnamamide ((-)-**1b**). 16% yield (11.5 mg, 0.020 mmol) as a white solid; mp 184-186 °C; 99% ee;  $[\alpha]_{\text{D}}^{20}$  -94.2 (*c* 0.43, CHCl<sub>3</sub>); <sup>1</sup>H NMR (300 MHz, CDCl<sub>3</sub>)  $\delta$  7.36-7.27 (m, 5H), 7.25-7.13 (m, 7H), 7.00-6.94 (m, 6H), 6.86 (qd, *J* = 2.7 and 7.7 Hz, 1H), 5.74 (d, *J* = 15.3 Hz, 1H), 4.71 (s, 1H), 3.84 (s, 3H), 2.76 (s, 1H), 2.23-2.16 (m, 2H), 2.04 (d, *J* = 12.1 Hz, 1H), 1.85-180 (m, 3H), 1.72-1.64 (m, 4H), 1.44 (t, *J* = 14.7 Hz, 2H), 1.20 (d, *J* = 14.4 Hz, 1H);

$^{13}\text{C}$  NMR (101 MHz,  $\text{CDCl}_3$ )  $\delta$  167.5, 157.2 (d,  $J_{\text{CP}} = 6.6$  Hz), 139.8, 135.6,  $134.6 \times 2$  (d,  $J_{\text{CP}} = 22.0$  Hz), 133.3 (d,  $J_{\text{CP}} = 27.6$  Hz),  $133.1 \times 2$  (d,  $J_{\text{CP}} = 19.2$  Hz), 129.3, 128.9, 128.7,  $128.4 \times 2$  (d,  $J_{\text{CP}} = 6.0$  Hz), 128.3, 128.22,  $128.15 \times 4$ ,  $127.6 \times 4$ , 126.7 (d,  $J_{\text{CP}} = 2.2$  Hz), 120.5, 112.2, 63.4 (d,  $J_{\text{CP}} = 6.6$  Hz), 55.4, 38.8, 37.89, 37.86, 31.9 (d,  $J_{\text{CP}} = 2.2$  Hz), 31.4, 30.8 (d,  $J_{\text{CP}} = 6.6$  Hz), 30.2, 27.8, 27.0;  $^{31}\text{P}$  NMR (121 MHz,  $\text{CDCl}_3$ )  $\delta$  -16.1; HRMS (ESI-orbitrap)  $m/z$  calcd for  $\text{C}_{38}\text{H}_{38}\text{O}_2\text{NP} + \text{H}$  572.2713 found 572.2711; EI-MS  $m/z$  (rel intensity) 571 ( $\text{M}^+$ , 3); HPLC (Daicel CHIRALPAC<sup>®</sup> IA, 0.46 $\times$ 25 cm, UV 270 nm, hexane : 2-Propanol = 98 : 2, 1.5 mL/min)  $t_{\text{R}}$  (minor) = 15.2 min (CD :  $\lambda_{\text{ext}}$  ( $\Delta\epsilon$ ) 254 (-)),  $t_{\text{R}}$  (major) = 20.6 min (CD :  $\lambda_{\text{ext}}$  ( $\Delta\epsilon$ ) 254 (+)).

### Optical Resolution of ( $\pm$ )-**1c**.

HPLC resolution of ( $\pm$ )-**1c** (96.9 mg, 0.186 mmol) dissolved in hexane (50 mL) was carried out by successive injections of 2 mL on a CHIRALCEL<sup>®</sup> OD (1.0 $\times$ 25 cm). A solution of hexane : 2-propanol = 98 : 2 was used as the eluent working at a flow rate of 3.0 mL/min and with UV monitoring at 254 nm. (*aR*)-(-)-**1c** and (*aS*)-(+)-**1c** were obtained by concentration of fractions respectively.

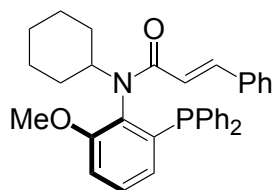

(*aR*)-(-)-*N*-(Cyclohexyl)-*N*-(2-(diphenylphosphaneyl)-6-methoxyphenyl)cinnamamide ((*aR*)-(-)-**1c**). 36% yield (34.9 mg, 0.067 mmol) as a white solid; mp 175-177 °C; 99% ee;  $[\alpha]_{\text{D}}^{20}$  -149 (*c* 0.48,  $\text{CHCl}_3$ );  $^1\text{H}$  NMR (300 MHz,  $\text{CDCl}_3$ )  $\delta$  7.38 (d,  $J = 15.5$  Hz, 1H), 7.34-7.26 (m, 6H), 7.25-7.18 (m 4H), 7.10-7.02 (m, 5H), 6.95 (dd,  $J = 1.2$  and 8.3 Hz, 1H), 6.84 (ddd,  $J = 2.7$  and 1.3 and 7.7 Hz, 1H), 5.70 (d,  $J = 15.6$  Hz, 1H), 4.11 (tt,  $J = 3.5$  and 11.6 Hz, 1H), 3.75 (s, 3H), 2.13 (t,  $J = 13.9$  Hz, 2H), 1.71-1.63 (m, 3H), 1.57-1.42 (m, 3H), 1.33-1.22 (m, 2H) 0.99 (tq,  $J = 3.7$  and 13.0 1H);  $^{13}\text{C}$  NMR (101 MHz,  $\text{CDCl}_3$ )  $\delta$  166.9, 156.9 (d,  $J_{\text{CP}} = 5.9$  Hz), 141.0 (d,  $J_{\text{CP}} = 13.9$  Hz), 140.1, 137.0 (d,  $J_{\text{CP}} = 13.2$  Hz), 135.7 (d,  $J_{\text{CP}} = 13.2$  Hz), 135.5, 134.39 (d,  $J_{\text{CP}} = 22.0$  Hz)  $\times 2$ , 134.38 (d,  $J_{\text{CP}} = 30.1$  Hz)  $\times 2$ , 133.2 (d,  $J_{\text{CP}} = 19.1$  Hz)  $\times 2$ , 129.2, 128.8 (d,  $J_{\text{CP}} = 2.9$  Hz)  $\times 2$ , 128.42 (d,  $J_{\text{CP}} = 3.0$  Hz)  $\times 2$ , 128.35(d,  $J_{\text{CP}} = 1.5$  Hz)  $\times 2$ , 128.27, 128.22  $\times 2$ , 127.7  $\times 2$ , 126.7 (d,  $J_{\text{CP}} = 1.5$  Hz), 120.4, 112.2, 59.5, 55.6, 31.0 (d,  $J_{\text{CP}} = 7.3$  Hz), 30.7 (d,  $J_{\text{CP}} = 2.2$  Hz), 26.2, 26.1, 25.9;  $^{31}\text{P}$  NMR (121 MHz,  $\text{CDCl}_3$ )  $\delta$  -17.4; HRMS (ESI-orbitrap)  $m/z$  calcd for  $\text{C}_{34}\text{H}_{34}\text{O}_2\text{NP} + \text{H}$  520.2400 found 520. 2398; EI-MS  $m/z$  (rel intensity) 519 ( $\text{M}^+$ , 6); HPLC (Daicel CHIRALCEL<sup>®</sup> OD-H, 0.46 $\times$ 25 cm, UV 254 nm, hexane : 2-

Propanol = 98 : 2, 0.8 mL/min)  $t_R$  (major) = 13.8 min (CD :  $\lambda_{\text{ext}}$  ( $\Delta\epsilon$ ) 254 (-)),  $t_R$  (minor) = 16.5 min (CD :  $\lambda_{\text{ext}}$  ( $\Delta\epsilon$ ) 254 (+)).

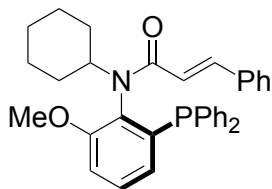

(aS)-(+)-N-(Cyclohexyl)-N-(2-(diphenylphosphaneyl)-6-methoxyphenyl)cinnamamide ((aS)-(+)-**1c**). 26% yield (25.2 mg, 0.048 mmol) as a white solid; mp 175-177 °C; 99% ee;  $[\alpha]_{\text{D}}^{20}$  131 (*c* 0.23, CHCl<sub>3</sub>); <sup>1</sup>H NMR (300 MHz, CDCl<sub>3</sub>)  $\delta$  7.38 (d, *J* = 15.5 Hz, 1H), 7.33-7.27 (m, 6H), 7.24-7.18 (m 4H), 7.10-7.02 (m, 5H), 6.95 (dd, *J* = 1.2 and 8.3 Hz, 1H), 6.84 (ddd, *J* = 2.7 and 1.3 and 7.7 Hz, 1H), 5.70 (d, *J* = 15.6 Hz, 1H), 4.11 (tt, *J* = 3.5 and 11.6 Hz, 1H), 3.76 (s, 3H), 2.13 (t, *J* = 13.9 Hz, 2H), 1.69-1.63 (m, 3H), 1.57-1.43 (m, 3H), 1.33-1.22 (m, 2H) 0.98 (tq, *J* = 3.7 and 13.0 1H); <sup>13</sup>C NMR (101 MHz, CDCl<sub>3</sub>)  $\delta$  166.9, 156.9 (d, *J*<sub>CP</sub> = 5.9 Hz), 141.1 (d, *J*<sub>CP</sub> = 13.9 Hz), 140.1, 137.1 (d, *J*<sub>CP</sub> = 13.2 Hz), 135.8 (d, *J*<sub>CP</sub> = 13.2 Hz), 135.5, 134.39 (d, *J*<sub>CP</sub> = 22.0 Hz)  $\times$  2, 134.38 (d, *J*<sub>CP</sub> = 30.1 Hz)  $\times$  2, 133.2 (d, *J*<sub>CP</sub> = 19.1 Hz)  $\times$  2, 129.2, 128.8 (d, *J*<sub>CP</sub> = 2.9 Hz)  $\times$  2, 128.42 (d, *J*<sub>CP</sub> = 3.0 Hz)  $\times$  2, 128.36  $\times$  2, 128.27, 128.22  $\times$  2, 127.7  $\times$  2, 126.7 (d, *J*<sub>CP</sub> = 1.5 Hz), 120.4, 112.2, 59.5, 55.6, 31.0 (d, *J*<sub>CP</sub> = 7.3 Hz), 30.7 (d, *J*<sub>CP</sub> = 2.2 Hz), 26.2, 26.1, 25.9; <sup>31</sup>P NMR (121 MHz, CDCl<sub>3</sub>)  $\delta$  -17.4; HRMS (ESI-orbitrap) *m/z* calcd for C<sub>34</sub>H<sub>34</sub>O<sub>2</sub>NP + H 520.2400 found 520. 2398; EI-MS *m/z* (rel intensity) 519 (M<sup>+</sup>, 5); HPLC (Daicel CHIRALCEL<sup>®</sup> OD-H, 0.46 $\times$ 25 cm, UV 254 nm, hexane : 2-Propanol = 98 : 2, 0.8 mL/min)  $t_R$  (minor) = 12.8 min (CD :  $\lambda_{\text{ext}}$  ( $\Delta\epsilon$ ) 254 (-)),  $t_R$  (major) = 17.3 min (CD :  $\lambda_{\text{ext}}$  ( $\Delta\epsilon$ ) 254 (+)).

**X-ray Diffraction Analysis data of (aS)-(+)-1c:** Colorless Prismatic crystals from hexane, orthorhombic space group *P*2<sub>1</sub>2<sub>1</sub>2<sub>1</sub>, *a* = 9.2573(2) Å, *b* = 17.7086(4) Å, *c* = 17.8309(4) Å,  $\alpha$  = 90 °,  $\beta$  = 93.1780(10) °,  $\gamma$  = 90 °, *V* = 2923.09(11) Å<sup>3</sup>, *Z* = 4,  $\rho$  = 1.181 g/cm<sup>3</sup>,  $\mu$  (CuK $\alpha$ ) = 1.059 mm<sup>-1</sup>. The structure was solved by the direct method of full-matrix least-squares, where the final *R* and *R*<sub>w</sub> were 0.0418 and 0.1117 for 5103 reflections.

#### General Procedure for the Palladium-Catalyzed Allylic Alkylation of Indoles.

To a mixture of **1** (12  $\mu$ mol), [Pd(C<sub>3</sub>H<sub>5</sub>)Cl]<sub>2</sub> (2.2 mg, 6  $\mu$ mol), indole or substituted indole (0.2 mmol), 1,3-diphenyl-2-propenyl acetate (60.6 mg, 0.24 mmol), and Cs<sub>2</sub>CO<sub>3</sub> (130 mg, 0.4 mol) was added THF (0.2 mL) at room temperature under an Ar atmosphere. After stirring for 18 h at 40 °C, the reaction mixture was quenched with water and diluted

with diethyl ether. The organic layer was washed with water and brine, and dried over MgSO<sub>4</sub>. The filtrate was concentrated under reduced pressure and the residue was purified by column chromatography (elution with *n*-hexane/EtOAc/Et<sub>3</sub>N = 20/4/1).

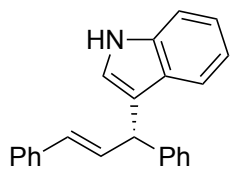

*(S,E)*-3-(1,3-Diphenylallyl)-1H-indole ((*S*)-**4a**) (Table 3, entry 1).<sup>5</sup>

69% yield (42.8 mg, 0.138 mmol) as a yellow solid; mp 118-120 °C; 97% ee; [ $\alpha$ ]<sub>D</sub><sup>20</sup> +36.7 (*c* 0.79, CHCl<sub>3</sub>); <sup>1</sup>H NMR (400 MHz, CDCl<sub>3</sub>)  $\delta$  7.78 (s, 1H), 7.41 (d, *J* = 8.0 Hz, 1H), 7.34-7.12 (m, 12H), 7.03-6.99 (m, 1H), 6.80 (d, *J* = 2.2 Hz, 1H), 6.70 (dd, *J* = 7.4 and 15.8 Hz, 1H), 6.42 (d, *J* = 15.8 Hz, 1H), 5.09 (d, *J* = 7.4 Hz, 1H); <sup>13</sup>C NMR (101 MHz, CDCl<sub>3</sub>)  $\delta$  143.3, 137.4, 136.5, 132.5, 130.5, 128.44×(1+1), 128.38, 127.1, 126.7, 126.34, 126.26, 122.6, 122.0, 119.8, 119.4, 118.5, 111.1, 46.1; EI-MS *m/z* (rel intensity) 309 (M<sup>+</sup>, 100); HPLC (Daicel CHIRALPAK<sup>®</sup> IB, 0.46  $\phi$  × 25 cm, UV 254 nm), hexane : ethanol = 99 : 1, 0.7 mL/min: *t*<sub>R</sub> = 55.4 min (minor) and 61.3 min (major).

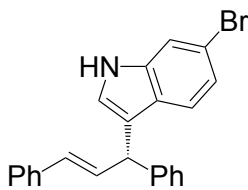

*(S,E)*-6-Bromo-3-(1,3-diphenylallyl)-1H-indole ((*S*)-**4b**) (Table 3, entry 2).<sup>5</sup>

70% yield (54.6 mg, 0.141 mmol) as a yellow solid; mp 132-134 °C; 90% ee; [ $\alpha$ ]<sub>D</sub><sup>20</sup> +34.9 (*c* 1.02, CHCl<sub>3</sub>); <sup>1</sup>H NMR (400 MHz, CDCl<sub>3</sub>)  $\delta$  7.82 (s, 1H), 7.41 (d, *J* = 1.6 Hz, 1H), 7.34-7.16 (m, 11H), 7.09 (dd, *J* = 1.7 and 8.5 Hz, 1H), 6.79 (dd, *J* = 0.9 and 2.3 Hz, 1H), 6.66 (dd, *J* = 7.3 and 15.8 Hz, 1H), 6.39 (d, *J* = 15.8 Hz, 1H), 5.04 (d, *J* = 7.3 Hz, 1H); <sup>13</sup>C NMR (101 MHz, CDCl<sub>3</sub>)  $\delta$  142.9, 137.34, 137.23, 132.0, 130.7, 128.49, 128.47, 128.36, 127.3, 126.3, 126.3, 125.6, 123.2, 122.7, 121.1, 118.8, 115.6, 114.0, 46.0; EI-MS *m/z* (rel intensity) 387 (M<sup>+</sup>, 100); HPLC (Daicel CHIRALPAK<sup>®</sup> IA-3, 0.46  $\phi$  × 25 cm, UV 254 nm), hexane : 2-propanol = 99 : 2, 0.9 mL/min: *t*<sub>R</sub> = 63.8 min (major) and 71.7 min (minor).

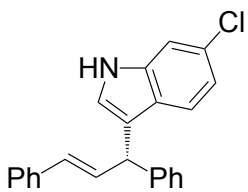

*(S,E)*-6-Chloro-3-(1,3-diphenylallyl)-1H-indole ((*S*)-**4c**) (Table 3, entry 3).<sup>5</sup> 70% yield (48.4 mg, 0.141 mmol) as a brown solid; mp 46-48 °C; 93% ee;

$[\alpha]_D^{20} +36.1$  ( $c$  0.98,  $\text{CHCl}_3$ );  $^1\text{H NMR}$  (400 MHz,  $\text{CDCl}_3$ )  $\delta$  7.86 (s, 1H), 7.35-7.17 (m, 12H), 6.96 (dd,  $J = 1.8$  and 8.6 Hz, 1H), 6.83 (dd,  $J = 0.8$  and 2.3 Hz, 1H), 6.67 (dd,  $J = 7.4$  and 15.8 Hz, 1H), 6.40 (d,  $J = 15.8$  Hz, 1H), 5.05 (d,  $J = 7.4$  Hz, 1H);  $^{13}\text{C NMR}$  (101 MHz,  $\text{CDCl}_3$ )  $\delta$  143.0, 137.2, 137.0, 132.1, 130.7, 128.49  $\times$  2, 128.47  $\times$  2, 128.37  $\times$  2, 128.0, 127.3, 126.5, 126.3  $\times$  2, 125.3, 123.2, 120.7, 120.1, 118.8, 111.0, 46.0; EI-MS  $m/z$  (rel intensity) 343 ( $\text{M}^+$ , 100); HPLC (Daicel CHIRALPAK<sup>®</sup> IA-3, 0.46  $\phi$   $\times$  25 cm, UV 254 nm), hexane : ethanol = 99 : 1, 0.7 mL/min:  $t_{\text{R}} = 60.6$  min (major) and 63.8 min (minor).

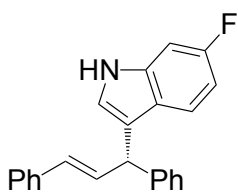

*(S,E)*-3-(1,3-Diphenylallyl)-6-fluoro-1H-indole ((*S*)-**4d**) (Table 3, entry 4).<sup>5</sup> 72% yield (47.4 mg, 0.145 mmol) as a brown solid; mp 42-44 °C; 93% ee;  $[\alpha]_D^{20} +23.0$  ( $c$  0.12,  $\text{CHCl}_3$ );  $^1\text{H NMR}$  (400 MHz,  $\text{CDCl}_3$ )  $\delta$  7.84 (s, 1H), 7.35-7.16 (m, 11H), 6.96 (dd,  $J = 2.3$  and 9.6 Hz, 1H), 6.81-6.64 (m, 3H), 6.41 (d,  $J = 15.8$  Hz, 1H), 5.05 (d,  $J = 7.4$  Hz, 1H);  $^{13}\text{C NMR}$  (101 MHz,  $\text{CDCl}_3$ )  $\delta$  159.9 (d,  $J_{\text{C-F}} = 236.2$  Hz), 143.1, 137.3, 136.5 (d,  $J_{\text{C-F}} = 12.4$  Hz), 132.2, 130.7, 128.49, 128.45, 128.39, 127.2, 126.5, 126.3, 123.3, 122.8 (d,  $J_{\text{C-F}} = 3.1$  Hz), 120.6 (d,  $J_{\text{C-F}} = 10.0$  Hz), 118.7, 108.2 (d,  $J_{\text{C-F}} = 24.2$  Hz), 97.4 (d,  $J_{\text{C-F}} = 25.9$  Hz), 46.1; EI-MS  $m/z$  (rel intensity) 327 ( $\text{M}^+$ , 100); HPLC (Daicel CHIRALPAK<sup>®</sup> IA, 0.46  $\phi$   $\times$  25 cm, UV 254 nm), hexane : ethanol = 99 : 1, 0.5 mL/min:  $t_{\text{R}} = 109.4$  min (major) and 118.9 min (minor).

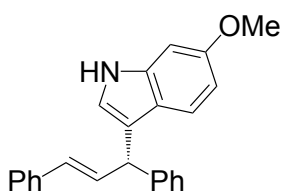

*(S,E)*-3-(1,3-Diphenylallyl)-6-methoxy-1H-indole ((*S*)-**4e**) (Table 3, entry 5).<sup>5</sup> 71% yield (48.3 mg, 0.142 mmol) as a yellow solid; mp 145-147 °C; 72% ee;  $[\alpha]_D^{20} +37.0$  ( $c$  1.04  $\text{CHCl}_3$ );  $^1\text{H NMR}$  (400 MHz,  $\text{CDCl}_3$ )  $\delta$  7.76 (s, 1H), 7.34-7.15 (m, 11H), 6.76 (d,  $J = 2.2$  Hz, 1H), 6.72-6.66 (m, 3H), 6.42 (d,  $J = 15.8$  Hz, 1H), 5.04 (d,  $J = 7.4$  Hz, 1H), 3.77 (s, 3H);  $^{13}\text{C NMR}$  (101 MHz,  $\text{CDCl}_3$ )  $\delta$  156.4, 143.4, 137.43, 137.36, 132.5, 130.4, 128.44, 128.41, 128.36, 127.1, 126.32, 126.26, 121.4, 121.2, 120.4, 118.5, 109.3, 94.6, 55.6, 46.2; EI-MS  $m/z$  (rel intensity) 339 ( $\text{M}^+$ , 100); HPLC (Daicel CHIRALPAK<sup>®</sup> IB, 0.46  $\phi$   $\times$  25 cm, UV 254 nm), hexane : ethanol = 99 : 1, 0.9 mL/min:  $t_{\text{R}} = 76.8$  min (minor) and 84.1 min (major).

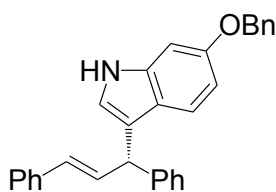

*(S,E)*-6-(Benzyloxy)-3-(1,3-diphenylallyl)-1H-indole ((*S*)-**4f**)

(Table 3, entry 6).<sup>5</sup> 87% yield (63.9 mg, 0.154 mmol) as a yellow solid; mp 132-134 °C; 87% ee;  $[\alpha]_D^{20} +32.78$  (*c* 1.02, CHCl<sub>3</sub>); <sup>1</sup>H NMR (400 MHz, CDCl<sub>3</sub>)  $\delta$  7.65 (s, 1H), 7.38 (d, *J* = 7.3 Hz, 2H), 7.34-7.13 (m, 14H), 6.76-6.64 (m, 4H), 6.40 (d, *J* = 15.8 Hz, 1H), 5.02 (d, *J* = 7.4 Hz, 1H), 4.99 (s, 2H); <sup>13</sup>C NMR (101 MHz, CDCl<sub>3</sub>)  $\delta$  155.5, 143.3, 137.41, 137.36, 137.23, 132.5, 130.4, 128.49, 128.44, 128.40, 128.36, 127.8, 127.4, 127.1, 126.32, 126.26, 121.53, 121.40, 120.4, 118.4, 110.0, 96.0, 70.5, 46.2; EI-MS *m/z* (rel intensity) 415 (M<sup>+</sup>, 88), 324 (100); HPLC (Daicel CHIRALPAK<sup>®</sup> IA, 0.46  $\phi$   $\times$  25 cm, UV 254 nm), hexane : ethanol = 98 : 2, 0.7 mL/min: *t*<sub>R</sub> = 46.0 min (major) and 52.3 min (minor).

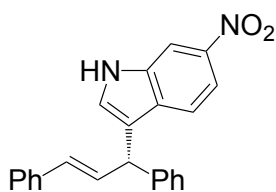

*(S,E)*-3-(1,3-Diphenylallyl)-6-nitro-1H-indole ((*S*)-**4g**) (Table 3, entry 7).<sup>5</sup> 26% yield (18.2 mg, 0.051 mmol) as a brown solid; mp 71-73 °C; 76% ee;

$[\alpha]_D^{20} +28.6$  (*c* 0.45, CHCl<sub>3</sub>); <sup>1</sup>H NMR (400 MHz, CDCl<sub>3</sub>)  $\delta$  8.66 (s, 1H), 8.35 (d, *J* = 0.5 Hz, 1H), 7.91 (dd, *J* = 1.4 and 8.9 Hz, 1H), 7.43 (d, *J* = 8.8 Hz, 1H), 7.38-7.22 (m, 11H), 6.69 (dd, *J* = 7.3 and 15.8 Hz, 1H), 6.42 (d, *J* = 15.9 Hz, 1H), 5.12 (d, *J* = 7.4 Hz, 1H); <sup>13</sup>C NMR (101 MHz, CDCl<sub>3</sub>)  $\delta$  143.2, 142.4, 137.0, 135.1, 131.42, 131.36, 131.1, 128.63, 128.60, 128.5, 128.3, 127.4, 126.8, 126.3, 119.73, 119.67, 114.9, 108.2, 45.8; EI-MS *m/z* (rel intensity) 354 (M<sup>+</sup>, 100); HPLC (Daicel CHIRALPAK<sup>®</sup> IA-3, 0.46  $\phi$   $\times$  25 cm, UV 254 nm), hexane : ethanol = 98 : 2, 0.5 mL/min: *t*<sub>R</sub> = 104.1 min (major) and 111.9 min (minor).

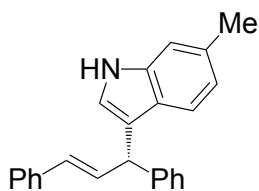

*(S,E)*-3-(1,3-Diphenylallyl)-6-methyl-1H-indole ((*S*)-**4h**) (Table 3, entry 8).<sup>5</sup> 34% yield (22.0 mg, 0.068 mmol) as a brown solid; mp 125-127 °C; 87% ee;

$[\alpha]_D^{20} +33.8$  (*c* 0.25, CHCl<sub>3</sub>); <sup>1</sup>H NMR (400 MHz, CDCl<sub>3</sub>)  $\delta$  7.81 (s, 1H), 7.36-7.17 (m, 11H), 7.12 (s, 1H), 6.85 (d, *J* = 8.1 Hz, 1H), 6.80 (dd, *J* = 0.7 and 2.2 Hz, 1H), 6.71 (dd, *J* = 7.4 and 15.8 Hz, 1H), 6.43 (d, *J* = 15.8 Hz, 1H), 5.08 (d, *J* = 7.4 Hz, 1H), 2.42 (s, 3H);

$^{13}\text{C}$  NMR (101 MHz,  $\text{CDCl}_3$ )  $\delta$  143.4, 137.4, 137.0, 132.5, 131.9, 130.4, 128.43 $\times$ (1+1), 128.36, 127.1, 126.30, 126.27, 124.6, 121.9, 121.1, 119.5, 118.4, 111.0, 46.2, 21.7; EI-MS  $m/z$  (rel intensity) 323 ( $\text{M}^+$ , 100); HPLC (Daicel CHIRALPAK<sup>®</sup> IB, 0.46  $\phi$   $\times$  25 cm, UV 254 nm), hexane : ethanol = 99 : 1, 0.7 mL/min:  $t_{\text{R}}$  = 64.9 min (minor) and 72.2 min (major).

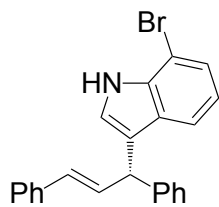

*(S,E)*-7-Bromo-3-(1,3-diphenylallyl)-1H-indole ((*S*)-**4i**) (Table 3, entry 9).<sup>5</sup> 64% yield (50.0 mg, 0.129 mmol) as a brown solid; mp 35-37 °C; 83% ee;  $[\alpha]_{\text{D}}^{20}$  +15.6 ( $c$  0.27,  $\text{CHCl}_3$ );  $^1\text{H}$  NMR (400 MHz,  $\text{CDCl}_3$ )  $\delta$  8.11 (s, 1H), 7.35-7.16 (m, 12H), 6.91 (dd,  $J$  = 0.9 and 2.4 Hz, 1H), 6.87 (t,  $J$  = 7.8 Hz, 1H), 6.68 (dd,  $J$  = 7.3 and 15.8 Hz, 1H), 6.40 (d,  $J$  = 15.8 Hz, 1H), 5.07 (d,  $J$  = 7.3 Hz, 1H);  $^{13}\text{C}$  NMR (101 MHz,  $\text{CDCl}_3$ )  $\delta$  142.9, 137.3, 135.3, 132.0, 130.8, 128.481, 128.468, 128.40, 127.9, 127.3, 126.5, 126.3, 124.4, 123.2, 120.6, 119.9, 119.1, 104.7, 46.2; EI-MS  $m/z$  (rel intensity) 387 ( $\text{M}^+$ , 100); HPLC (Daicel CHIRALPAK<sup>®</sup> IB, 0.46  $\phi$   $\times$  25 cm, UV 254 nm), hexane : ethanol = 99 : 1, 0.7 mL/min:  $t_{\text{R}}$  = 25.0 min (major) and 28.4 min (minor).

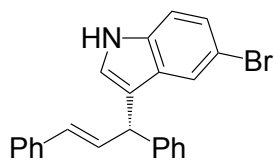

*(S,E)*-5-Bromo-3-(1,3-diphenylallyl)-1H-indole ((*S*)-**4j**) (Table 3, entry 10).<sup>5</sup> 60% yield (46.7 mg, 0.120 mmol) as a brown solid; mp 50-52 °C; 91% ee;  $[\alpha]_{\text{D}}^{20}$  +37.2 ( $c$  0.55,  $\text{CHCl}_3$ );  $^1\text{H}$  NMR (400 MHz,  $\text{CDCl}_3$ )  $\delta$  7.90 (s, 1H), 7.53 (t,  $J$  = 0.7 Hz, 1H), 7.35-7.13 (m, 12H), 6.83 (d,  $J$  = 2.2 Hz, 1H), 6.65 (dd,  $J$  = 7.3 and 15.8 Hz, 1H), 6.38 (d,  $J$  = 15.8 Hz, 1H), 5.03 (d,  $J$  = 7.2 Hz, 1H);  $^{13}\text{C}$  NMR (101 MHz,  $\text{CDCl}_3$ )  $\delta$  142.8, 137.2, 135.2, 132.0, 130.7, 128.49 $\times$ (1+1), 128.34, 127.2, 126.5, 126.3, 125.0, 123.8, 122.2, 118.3, 112.68, 112.56, 45.8; EI-MS  $m/z$  (rel intensity) 387 ( $\text{M}^+$ , 100); HPLC (Daicel CHIRALPAK<sup>®</sup> IB, 0.46  $\phi$   $\times$  25 cm, UV 254 nm), hexane : ethanol = 99 : 1, 0.9 mL/min:  $t_{\text{R}}$  = 36.7 min (minor) and 39.2 min (major).

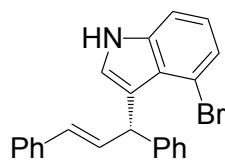

*(S,E)*-4-Bromo-3-(1,3-diphenylallyl)-1H-indole ((*S*)-**4k**) (Table 3, entry 11).<sup>5</sup> 68% yield (53.2 mg, 0.137 mmol) as a brown solid; mp 50-52 °C; 95% ee;

$[\alpha]^{20}_{\text{D}} +45.3$  ( $c$  0.18,  $\text{CHCl}_3$ );  $^1\text{H NMR}$  (400 MHz,  $\text{CDCl}_3$ )  $\delta$  8.12 (s, 1H), 7.33-7.15 (m, 12H), 6.95 (t,  $J = 7.9$  Hz, 1H), 6.86 (d,  $J = 2.4$  Hz, 1H), 6.70 (dd,  $J = 6.6$  and 15.8 Hz, 1H), 6.21 (d,  $J = 15.9$  Hz, 1H), 5.88 (d,  $J = 6.5$  Hz, 1H);  $^{13}\text{C NMR}$  (101 MHz,  $\text{CDCl}_3$ )  $\delta$  143.8, 137.69, 137.56, 133.7, 130.6, 128.92, 128.43, 128.18, 127.0, 126.22, 126.16, 124.90, 124.75, 124.3, 122.9, 118.9, 114.3, 110.5, 44.7; EI-MS  $m/z$  (rel intensity) 387 ( $\text{M}^+$ , 100); HPLC (Daicel CHIRALPAK<sup>®</sup> IA-3,  $0.46 \phi \times 25$  cm, UV 254 nm), hexane : ethanol = 99 : 1, 0.5 mL/min:  $t_{\text{R}} = 105.7$  min (major) and 116.8 min (minor).

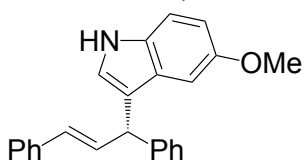

*(S,E)*-3-(1,3-Diphenylallyl)-5-methoxy-1H-indole ((*S*)-**4l**) (Table 3, entry 12).<sup>5</sup> 78% yield (53.1 mg, 0.156 mmol) as a brown solid; mp 53-55 °C; 91% ee;  $[\alpha]^{20}_{\text{D}} +27.1$  ( $c$  0.17,  $\text{CHCl}_3$ );  $^1\text{H NMR}$  (400 MHz,  $\text{CDCl}_3$ )  $\delta$  7.80 (s, 1H), 7.35-7.16 (m, 11H), 6.83-6.80 (m, 3H), 6.69 (dd,  $J = 7.3$  and 15.8 Hz, 1H), 6.42 (d,  $J = 15.8$  Hz, 1H), 5.05 (d,  $J = 7.2$  Hz, 1H), 3.69 (s, 3H);  $^{13}\text{C NMR}$  (101 MHz,  $\text{CDCl}_3$ )  $\delta$  153.7, 143.2, 137.4, 132.4, 131.7, 130.5, 128.45 $\times$ (1+1), 128.39, 127.127, 127.119, 126.4, 126.2  $\times$  2, 123.4, 118.2, 112.1, 111.8, 101.7, 55.7, 46.1; EI-MS  $m/z$  (rel intensity) 339 ( $\text{M}^+$ , 100); HPLC (Daicel CHIRALPAK<sup>®</sup> IB,  $0.46 \phi \times 25$  cm, UV 254 nm), hexane : ethanol = 99 : 1, 0.9 mL/min:  $t_{\text{R}} = 42.1$  min (minor) and 49.5 min (major).

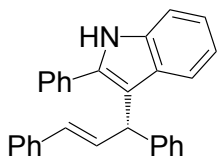

*(S,E)*-3-(1,3-Diphenylallyl)-2-phenyl-1H-indole ((*S*)-**4m**) (Table 3, entry 13).<sup>5</sup> 88% yield (67.8 mg, 0.176 mmol) as a yellow solid; mp 86-88 °C; 92% ee;  $[\alpha]^{20}_{\text{D}} +89.7$  ( $c$  0.99,  $\text{CHCl}_3$ );  $^1\text{H NMR}$  (400 MHz,  $\text{CDCl}_3$ )  $\delta$  7.94 (s, 1H), 7.49-7.12 (m, 18H), 7.00-6.96 (m, 1H), 6.88 (dd,  $J = 7.3$  and 15.8 Hz, 1H), 6.39 (d,  $J = 15.8$  Hz, 1H), 5.27 (d,  $J = 7.2$  Hz, 1H);  $^{13}\text{C NMR}$  (75 MHz,  $\text{CDCl}_3$ )  $\delta$  143.4, 137.4, 136.1, 135.5, 132.9, 132.2, 131.0, 128.8, 128.6, 128.4, 128.25, 128.23, 128.0, 127.8, 127.1, 126.3, 126.1, 122.1, 121.2, 119.7, 113.7, 110.9, 45.1; EI-MS  $m/z$  (rel intensity) 385 ( $\text{M}^+$ , 100); HPLC (Daicel CHIRALPAK<sup>®</sup> IB,  $0.46 \phi \times 25$  cm, UV 254 nm), hexane : ethanol = 99 : 1, 0.9 mL/min:  $t_{\text{R}} = 16.4$  min (major) and 17.8 min (minor).



**Table S1.** Time Dependence of Ee Value of **1b** at Various Temperatures in Dodecane.

| Time (sec) | Ee (%) <sup>a</sup><br>at 70 °C | Ee (%) <sup>a</sup><br>at 75 °C | Ee (%) <sup>a</sup><br>at 80 °C | Ee (%) <sup>a</sup><br>at 85 °C |
|------------|---------------------------------|---------------------------------|---------------------------------|---------------------------------|
| 0          | 99.0                            | 99.0                            | 99.0                            | 99.0                            |
| 1800       | 98.4                            | 97.5                            | 97.8                            | 96.8                            |
| 3600       | 97.8                            | 96.9                            | 95.2                            | 94.8                            |
| 7200       | 95.7                            | 93.8                            | 90.7                            | 88.6                            |
| 14400      | 90.9                            | 86.8                            | 80.7                            | 79.2                            |
| 28800      | 84.2                            | 73.6                            | 66.1                            | 63.0                            |
| 86400      | 61.7                            | 46.4                            | 32.4                            |                                 |

<sup>a</sup> Ee was determined by chiral HPLC analysis.

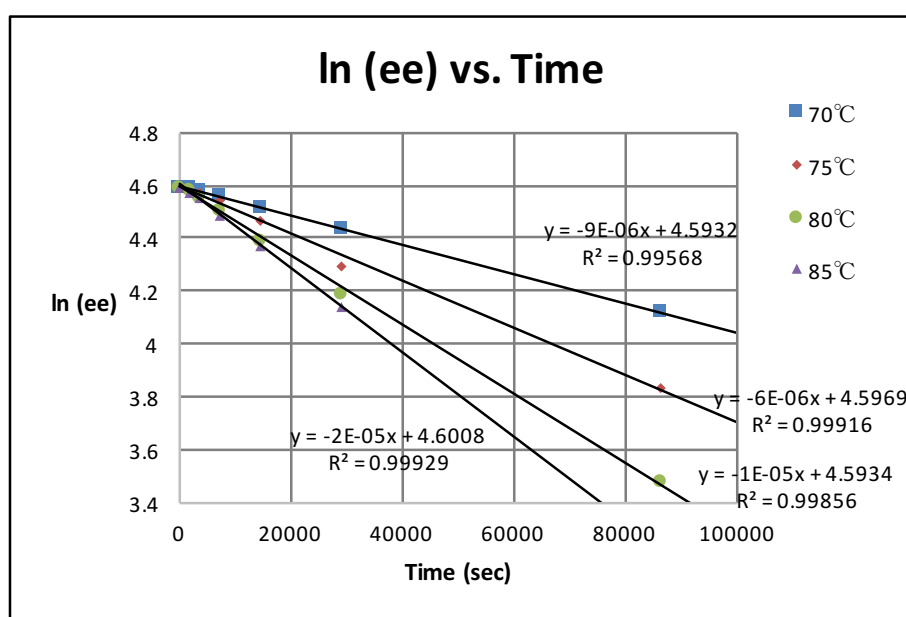

**Figure S1.** Data for the Racemization Plot of **1b**

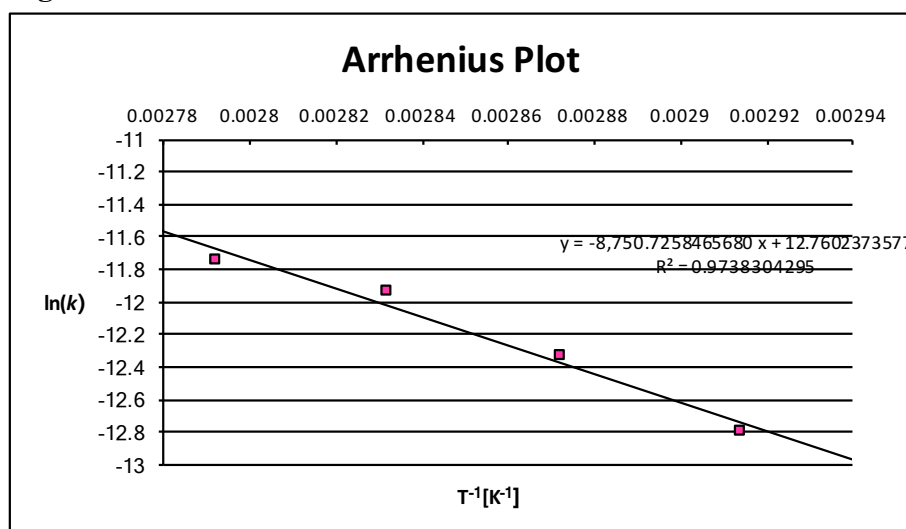

**Figure S2.** Data for the Arrhenius Plot of **1b**

**Table S2.** Time Dependence of Ee Value of **1c** at Various Temperatures in Dodecane.

| Time (sec) | Ee (%) <sup>a</sup><br>at 40 °C | Ee (%) <sup>a</sup><br>at 45 °C | Ee (%) <sup>a</sup><br>at 55 °C | Ee (%) <sup>a</sup><br>at 60 °C |
|------------|---------------------------------|---------------------------------|---------------------------------|---------------------------------|
| 0          | 99.0                            | 99.0                            | 99.0                            | 96.4                            |
| 1800       | 96.3                            | 94.6                            | 85.4                            | 71.8                            |
| 3600       | 94.4                            | 89.9                            | 70.2                            | 49.9                            |
| 7200       | 89.1                            | 78.3                            | 54.9                            |                                 |
| 14400      | 80.5                            | 64.3                            |                                 |                                 |
| 28800      | 63.9                            | 39.5                            |                                 |                                 |

<sup>a</sup> Ee was determined by chiral HPLC analysis.

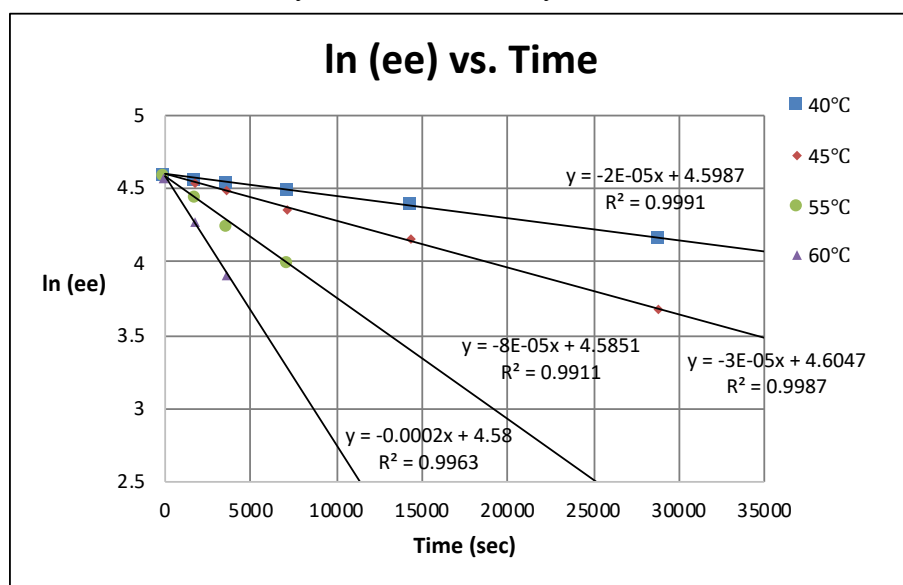

**Figure S3.** Data for the Racemization Plot of **1c**

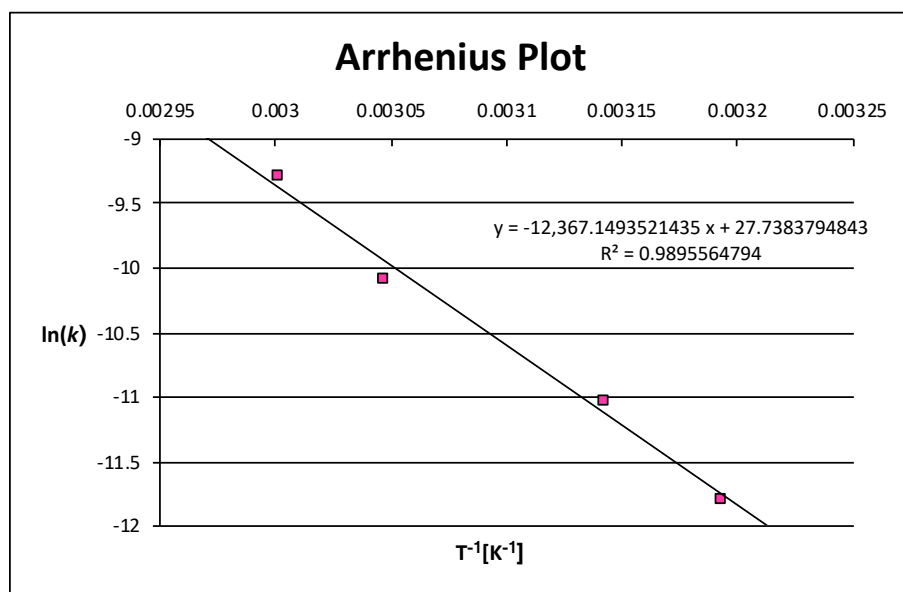

**Figure S4.** Data for the Arrhenius Plot of **1c**

$^1\text{H}$ ,  $^{13}\text{C}$  and  $^{31}\text{P}$  NMR of *N*-(2-(Diphenylphosphanyl)-6-methoxyphenyl)adamantan-1-amine (**3a**)

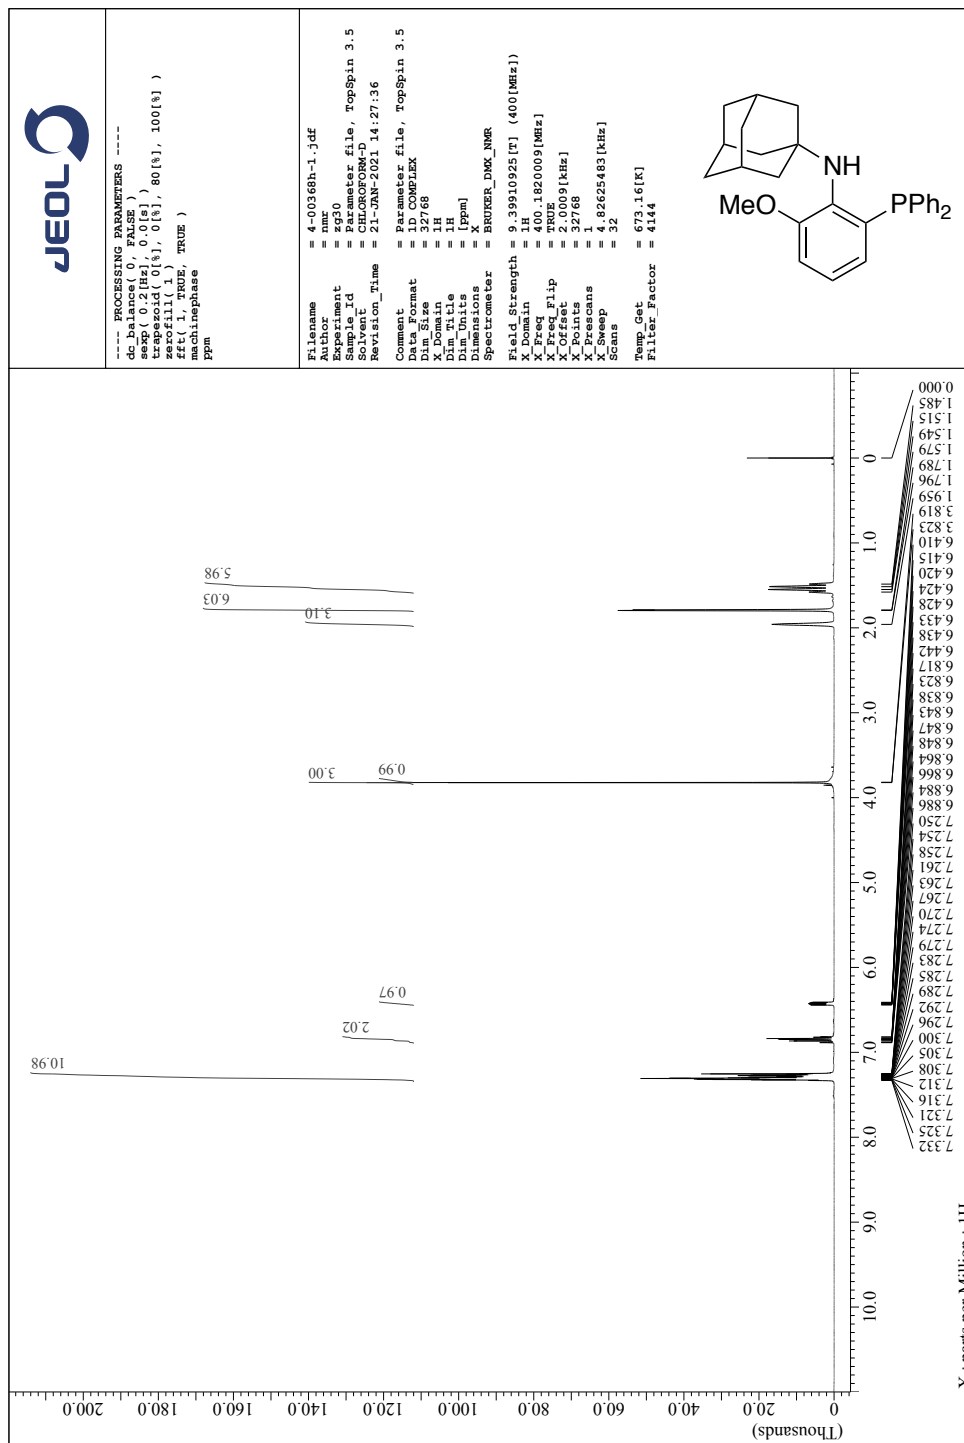

DFLE C:\KVOUSE\19\NMR\06\1N0201  
 DATIM 822908CH1F1D  
 COM1 07/Feb/2019 04:46:34  
 13C  
 ZGPG30  
 EXMOD 75.49 MHz  
 OBFRO 0 kHz  
 OBSSET 8301.699 Hz  
 OBFIN 131072 (ZeroF1)  
 POINT 11:~4  
 FREQU 18115.94 Hz  
 SCANS 8192  
 ACQTM 1.8088 s  
 PD 2.0 s  
 PULC 0.0 Hz  
 PULS 0.0 Hz  
 PROBRD 5 MM BBO BB-1H-D Z-GRD  
 ZS284/01  
 INSTRUM SPECT  
 PULSPG  
 GROPPROG  
 CTEMP 26.85 °C  
 SLVNT CDCL3  
 EXREF 77.0 ppm  
 BF 0.25 Hz  
 WINDOW Exponential  
 RGAIN 1024  
 Operator \_\_\_\_\_

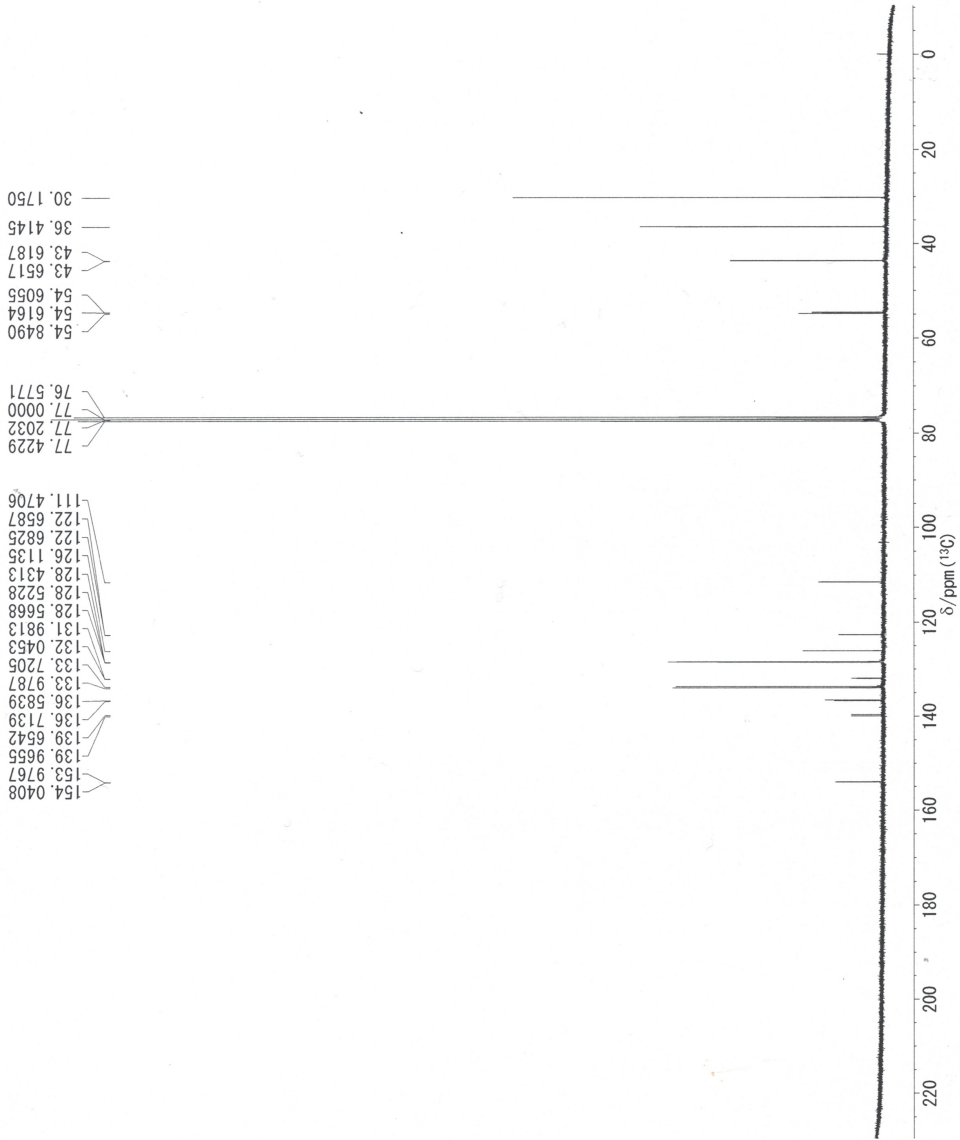

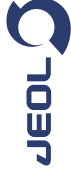

```
----- PROCESSING PARAMETERS -----  
sexp( 2.0[Hz], 0.0[s] )  
trapezoid( 0[%], 0[%], 80[%], 100[%] )  
zerofill( 0 )  
sft( 0, TRUE, TRUE )  
machinephase  
ppm
```

```
Filename = 22908p-1.jdf  
Author = root  
Experiment = zpgj30  
Parameter file, TOPSPIN Ver =  
Sample_Id = CHURCOB-D-  
Revision_Time = 14-Jan-2011 20:46:22  
Comment = Parameter file, TOPSPIN Ver  
Data_Format = 1D, COMPLEX  
Data_Size = 32768  
X_Domain = 31P  
Dim_Title = [ppm]  
Dim_Units = X  
Spectrometer = BRUKER_DMG_NMR  
Field_Strength = 7.05156322[T] (300[MHz])  
X_Domain = 31P  
X_Freq = 121.535182[MHz]  
X_Offset = 0[Hz]  
X_Points = 32768  
X_Frescans = 1  
X_Sweep = 38.53564547[MHz]  
Scans = 8  
Temp_Get = 300[K]  
Filter_Factor = 3
```

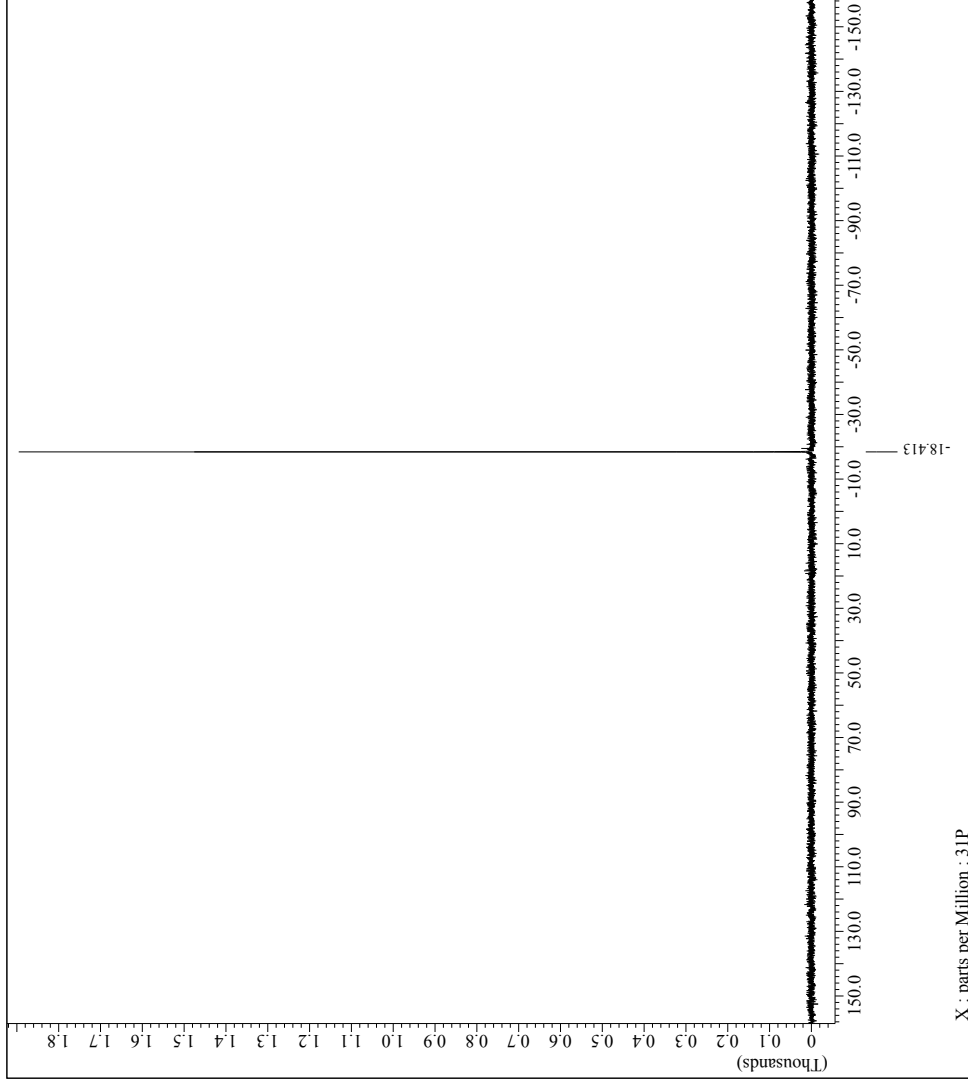

X : parts per Million : 31P

$^1\text{H}$ ,  $^{13}\text{C}$  and  $^{31}\text{P}$  NMR of *N*-(2-(Diphenylphosphanyl)-6-methoxyphenyl)adamantan-2-amine (**3b**)

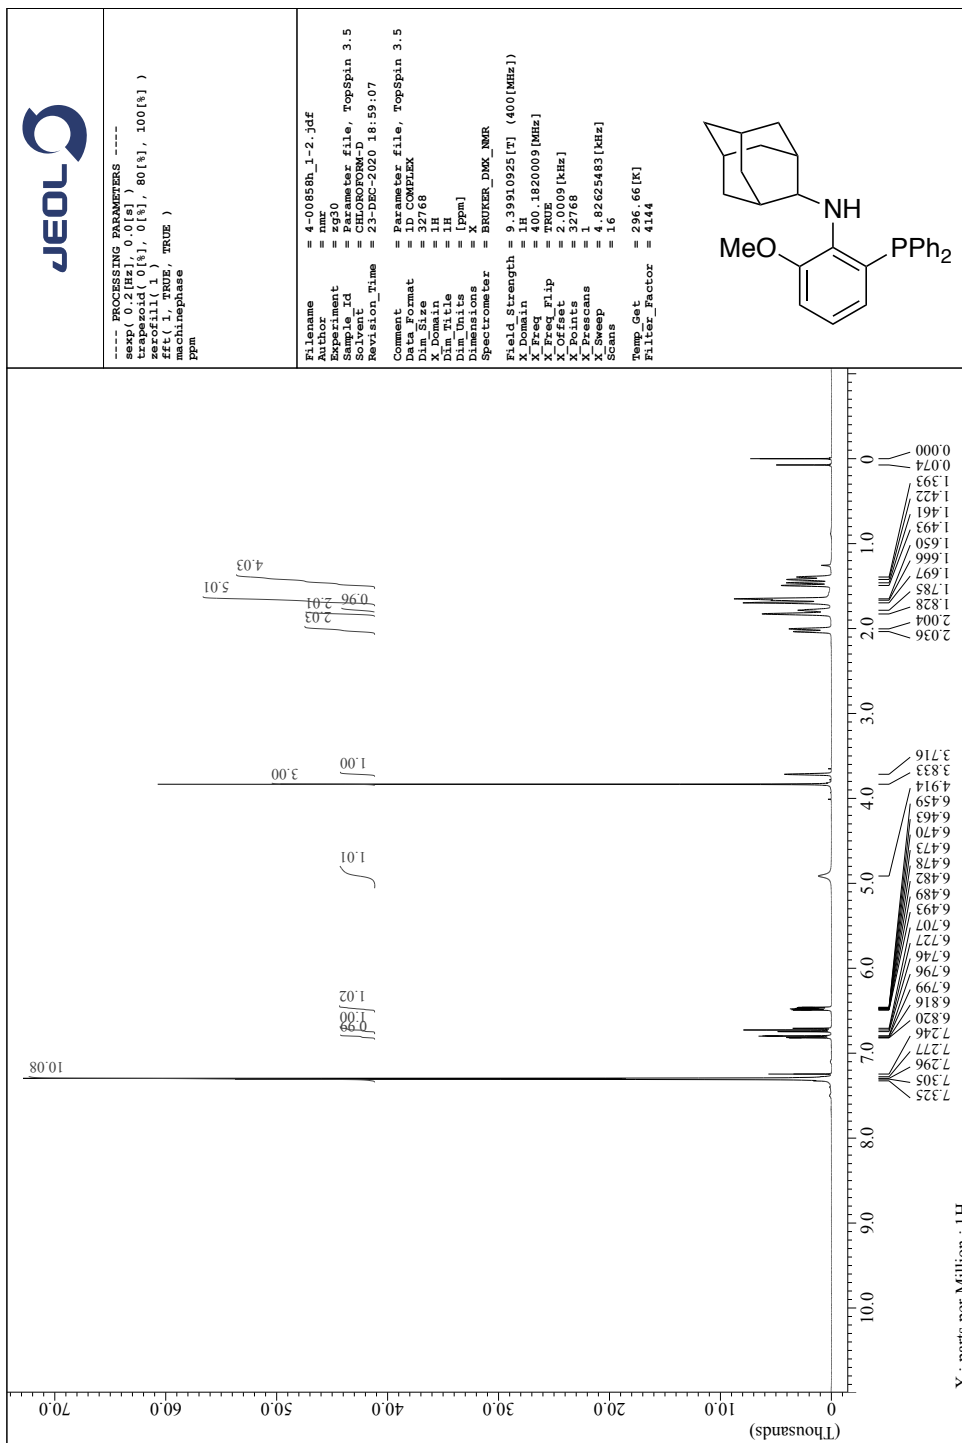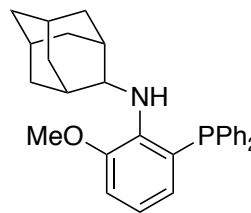

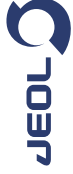

----- PROCESSING PARAMETERS -----  
sexp( 0.1[Hz], 0.0[s] )  
trapezoid( 0[%], 0[%], 80[%], 100[%] )  
zerofill( TRUE )  
gain( 1.00 )  
machinephase  
ppm

Filename = 4-0858c\_1-2.jdf  
Author = nmz  
Experiment = zpgj30  
Parameter file, TopSpin 3.5  
Sample\_Id = HURCOP01  
SOLVENT = DMSO-d6  
Revision\_Time = 23 DEC 2010 19:01:43  
Comment = Parameter file, TopSpin 3.5  
Date\_Format = DD.MM.YYYY  
Data\_Size = 133.68  
X\_Domain = 13C  
Dim\_Title = 13C  
Dim\_Units = [ppm]  
Dimensions = X  
Spectrometer = BRUKER\_DMG\_NMR  
Field\_Strength = 9.39910925 [T] (400 [MHz])  
X\_Domain = 13C  
X\_Freq = 100.63640982 [MHz]  
X\_P1 = 12.500000 [ppm]  
X\_Offset = 11.068788 [kHz]  
X\_Points = 32768  
X\_Freescans = 2  
X\_Sweep = 24.03846154 [kHz]  
Scans = 236  
Temp\_Get = 297.36 [K]  
Filter\_Factor = 832

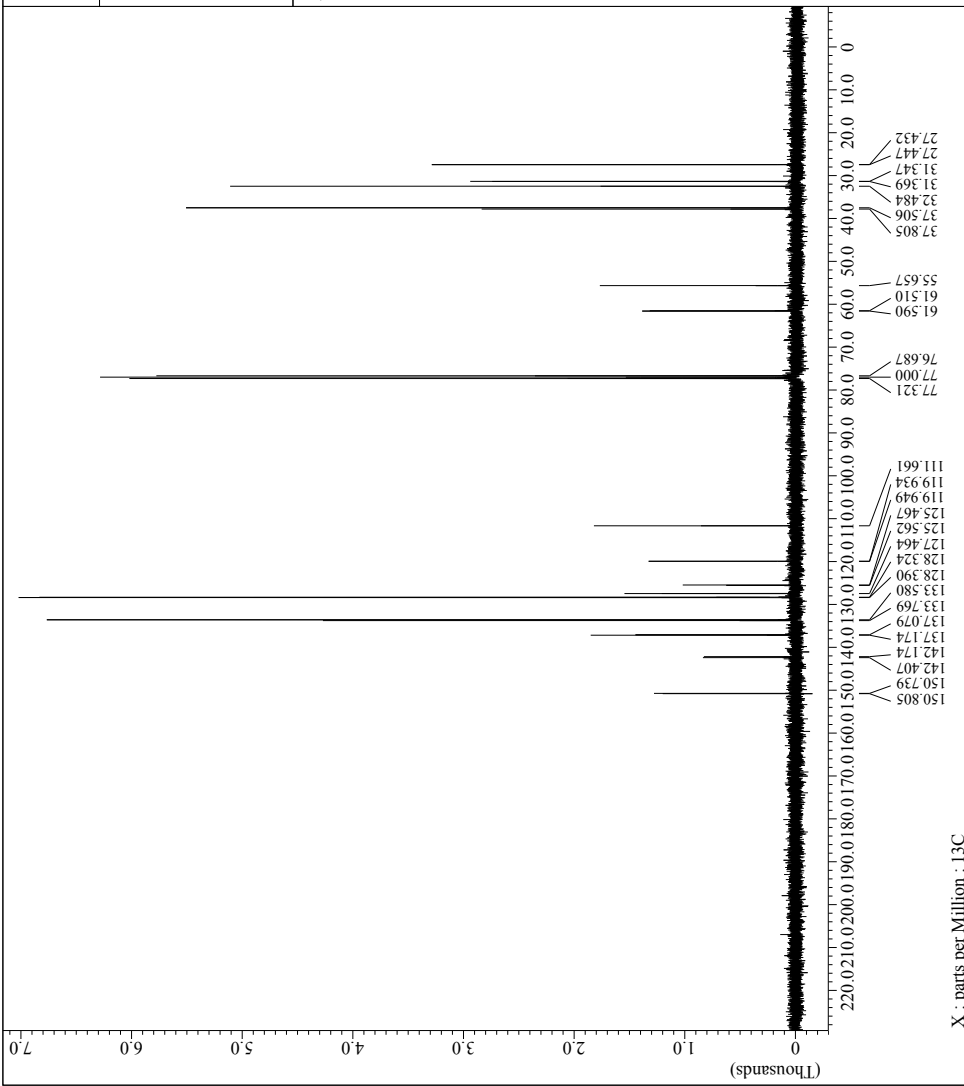

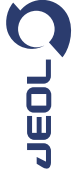

----- PROCESSING PARAMETERS -----  
seop( 2.0[HHz], 0.0[s] )  
trepasoid( 0[s], 0[s], 80[%], 100[%] )  
zerofill( 1 )  
frc( 1, TRUE, TRUE )  
manipulate  
ppm

Filename = 2280p\_1\_1\_1.dcf  
Sample = 2280p\_1\_1\_1  
Experiment = zopg30  
Sample Id = Parameter file, TOPSPIN Var  
Solvent = CHLOROFORM-D  
Revision\_Time = 30-SEP-2020 20:02:24  
Comment = Parameter file, TOPSPIN Var  
Data Format = 1D COMPLEX  
Data Size = 32768  
X\_Domain = 31P  
Y\_Domain = 1  
Dim Units = [ppm]  
Dimensions = X  
Spectrometer = BRUKER\_DMX\_NMR  
Field\_Strength = 7.05156322 [T] (300 [MHz])  
X\_Domain = 31P  
X\_Freq = 121.535182 [MHz]  
X\_Freq\_Flip = TRUE  
X\_Offset = 0 [Hz]  
X\_Scans = 1  
X\_Sweeps = 38.53564547 [kHz]  
Scans = 8  
Temp\_Cat = 300 [K]  
Filter\_Factor = 3

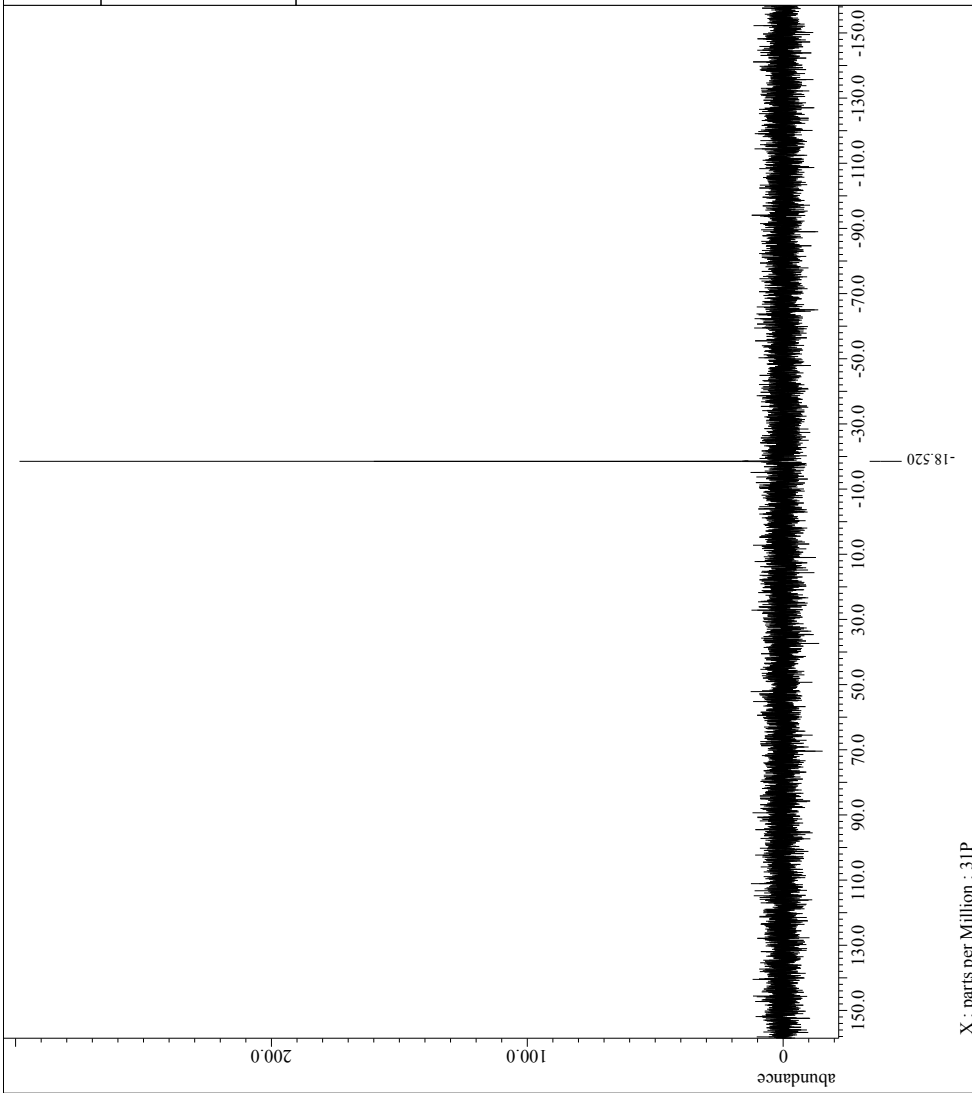



$^1\text{H}$ ,  $^{13}\text{C}$  and  $^{31}\text{P}$  NMR of *N*-(2-(Diphenylphosphanyl)-6-methoxyphenyl)cyclohexylamine (**3c**)

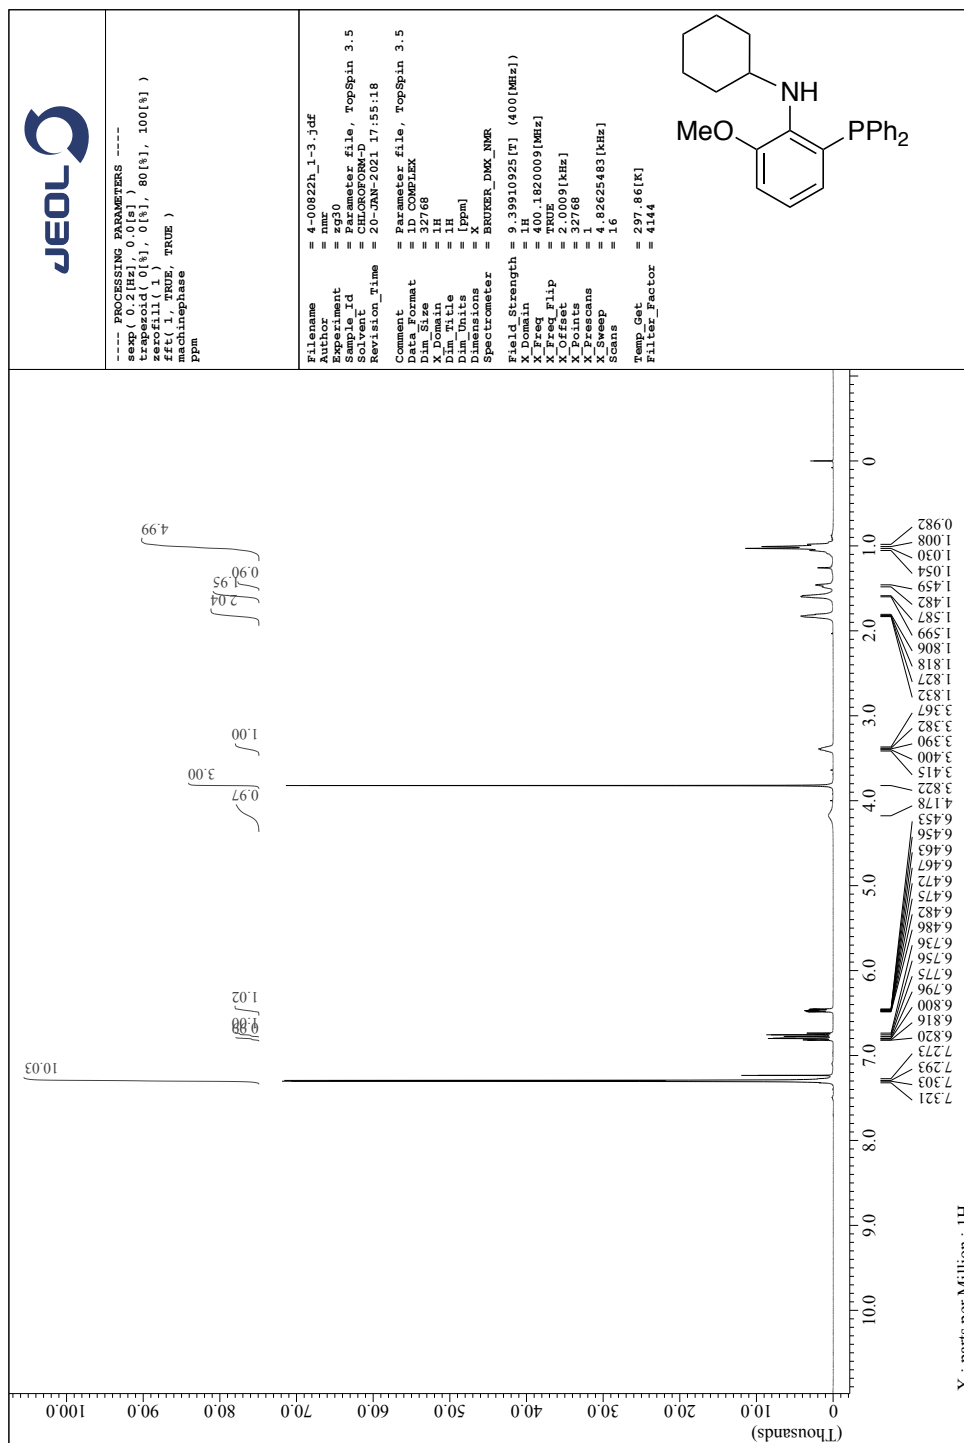

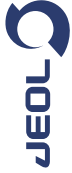

```
----- PROCESSING PARAMETERS -----  
sexp( 0.1[Hz], 0.0[s] )  
trapezoid( 0[%], 0[%], 80[%], 100[%] )  
zerofill( 0 )  
scale( 1, TRUE )  
machinephase  
ppm
```

```
Filename = 4-0860c_1-4.jdf  
Author = nmz  
Experiment = zpgj30  
Parameter file, TopSpin 3.5  
Sample_Id = CHURCOB-D-  
Revision_Time = 14_Oct-2011_21:23:13  
Comment = Parameter file, TopSpin 3.5  
Date_Format = DD.MM.YYYY  
Data_Size = 18.68  
X_Domain = 13C  
Dim_Title = 13C  
Dim_Units = [ppm]  
Dimensions = X  
Spectrometer = BRUKER_DMG_NMR  
Field_Strength = 9.39910925 [T] (400 [MHz])  
X_Domain = 13C  
X_Freq = 100.63640982 [MHz]  
X_P1 = 12.50 [us]  
X_P2 = 12.50 [us]  
X_Offset = 11.068788 [kHz]  
X_Points = 32768  
X_Frescans = 2  
X_Sweep = 24.03846154 [kHz]  
Scans = 512  
Temp_Get = 297.46 [K]  
Filter_Factor = 832
```

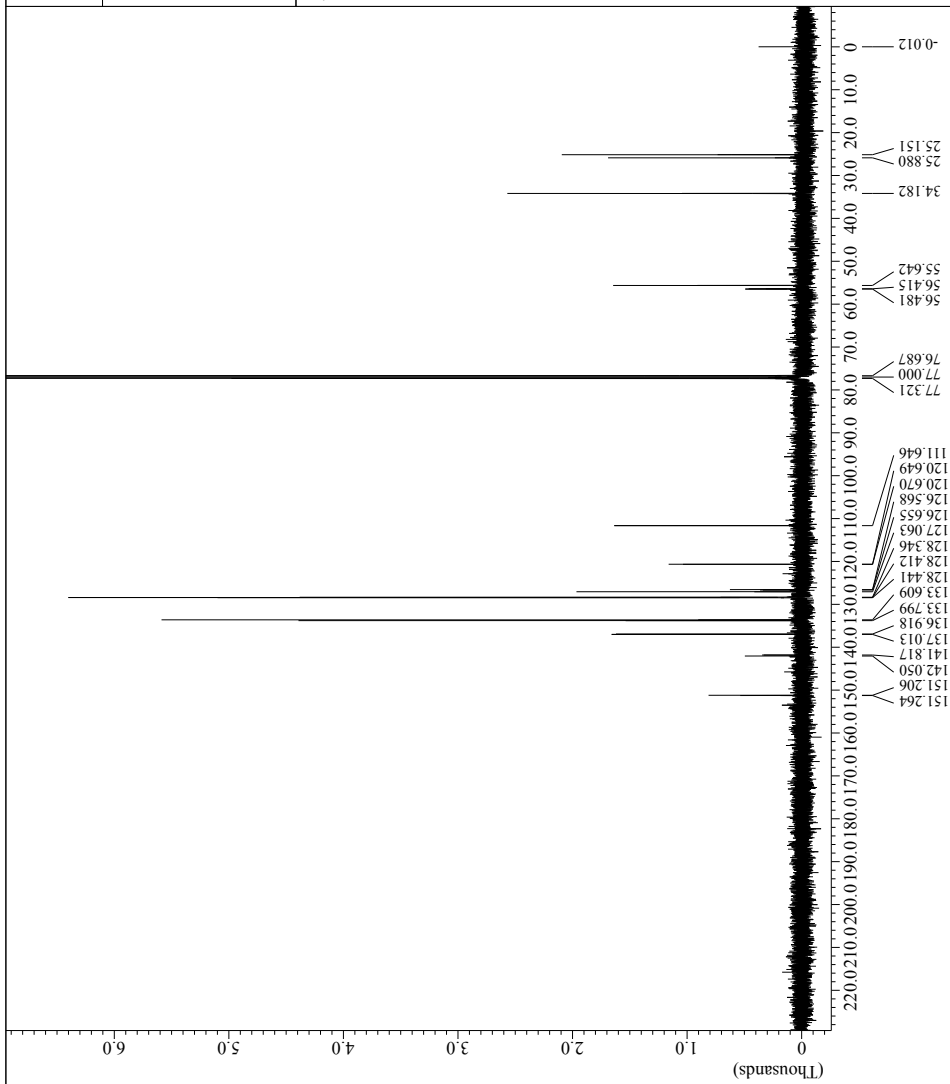



```
----- PROCESSING PARAMETERS -----  
sexp( 2.0[Hz], 0.0[s] )  
trapezoid( 0[%], 0[%], 80[%], 100[%] )  
zerofill( 1000 )  
sfr( 1000, TRUE )  
machinephase  
ppm
```

```
Filename = 4-0822p_1-1.jdf  
Author = nmz  
Experiment = zpg30  
Sample_Id = Parameter file, TopSpin 3.5  
Solvent = CHLOROFORM-D  
Revision_Time = 7-OCT-2000 18:37:47  
Comment = Parameter file, TopSpin 3.5  
Date_Format = DD.MM.YYYY  
Data_Size = 37.68  
X_Domain = 31P  
Dim_Title = 31P  
Dim_Units = [ppm]  
Dimensions = X  
Spectrometer = BRUKER_DMG_NMR  
Field_Strength = 9.39910925[T] (400[MHz])  
X_Domain = 31P  
X_Freq = 161.995835[MHz]  
X_Offset = 0[Hz]  
X_Phase = 0[Hz]  
X_Points = 32768  
X_Prescans = 1  
X_Sweep = 51.02040816[MHz]  
Scans = 8  
Temp_Get = 297.96[K]  
Filter_Factor = 392
```

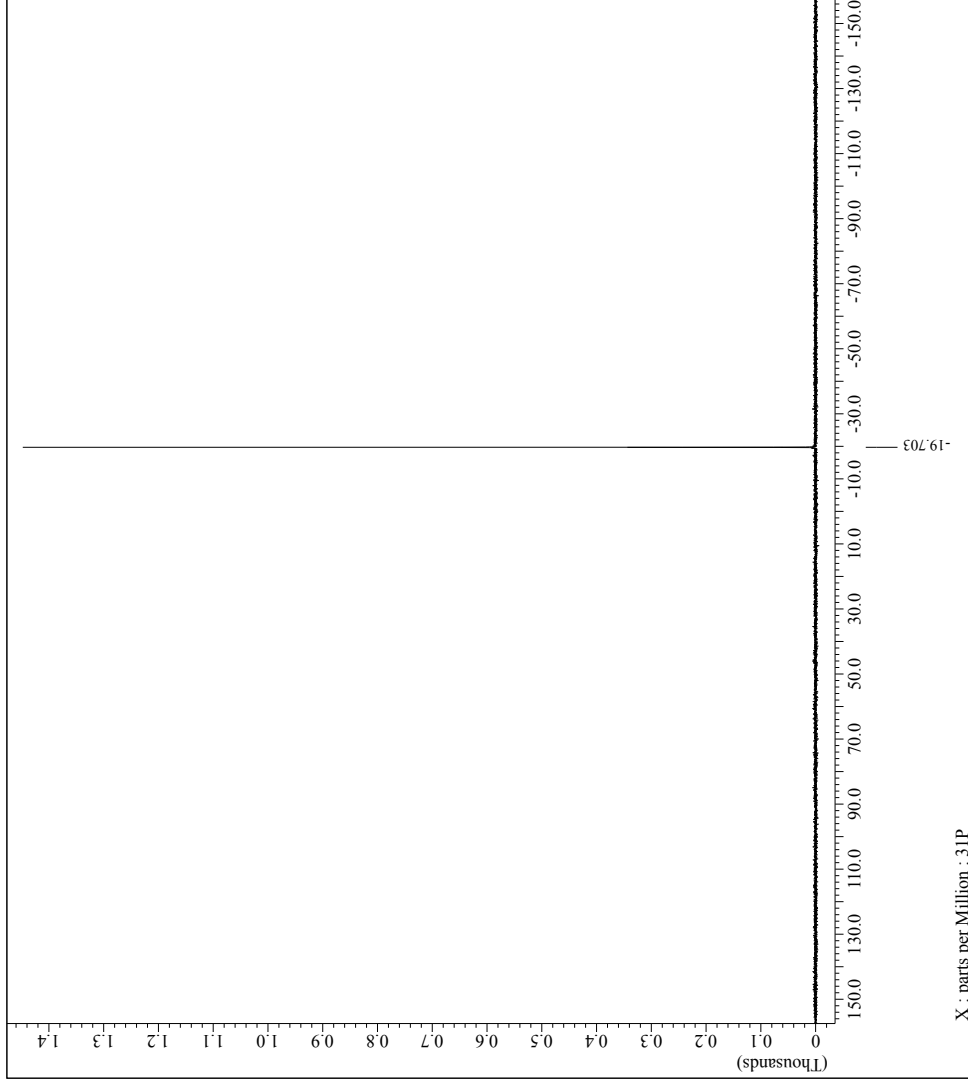

X : parts per Million : 31P

<sup>1</sup>H, <sup>13</sup>C and <sup>31</sup>P NMR, and chiral phase HPLC chart of (±)-N-(Adamantan-1-yl)-N-(2-(diphenylphosphanyl)-6-methoxyphenyl)cinnamamide ((±)-**1a**)

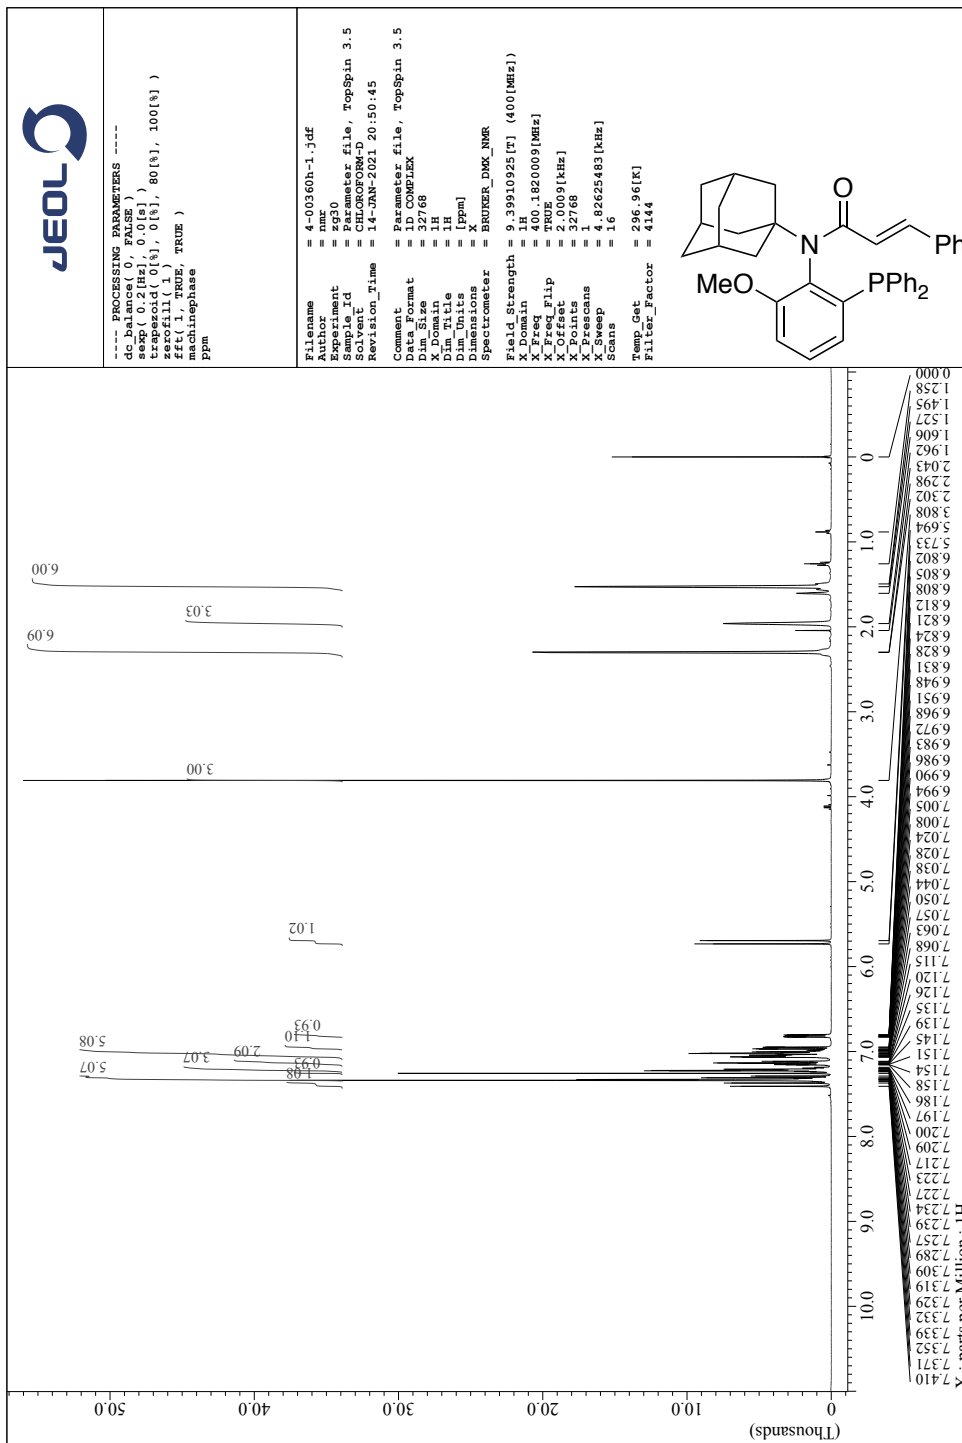

DF FILE C:\KYOUSETI\MR06MIN0201  
 847 00361C\F1414  
 DATUM 31/Jan/2019 15:30:41  
 COMNT  
 ORNUC <sup>13</sup>C  
 ZGPC30  
 EXMOD 100.63 MHz  
 OBFRQ 0.0 kHz  
 OBSEF 11066.5 Hz  
 OBFIN 131072 (ZeroFi  
 POINT 11: x4)  
 FREQU 24038.46 Hz  
 SCANS 1024  
 ACQTM 1.3631 s  
 PD 2.0 s  
 PW1 10.0 us  
 TRNUC OFF  
 PROBHD Z108618.011 (TA BBO 4  
 00S1 BBF-H-D-05-Z PLUS)  
 SPECT  
 INSTRM  
 SPCG  
 GRPPOG  
 CTEMP 25.31 °C  
 SLVNT CDCl<sub>3</sub>  
 EXREF 77.0 ppm  
 BF 0.25 Hz  
 WINDOW Exponential  
 RGAIN 203  
 Operator:

166.52  
 157.29  
 157.23  
 141.44  
 141.31  
 139.76  
 136.80  
 136.67  
 136.50  
 136.38  
 135.71  
 135.51  
 135.23  
 134.14  
 133.93  
 133.82  
 133.62  
 128.92  
 128.76  
 128.59  
 128.52  
 128.46  
 128.45  
 128.35  
 128.30  
 128.28  
 127.67  
 127.21  
 127.19  
 122.11  
 122.09  
 111.88  
 77.32  
 77.20  
 77.00  
 76.68  
 61.05  
 55.55  
 40.37  
 39.58  
 39.54  
 36.54  
 30.34

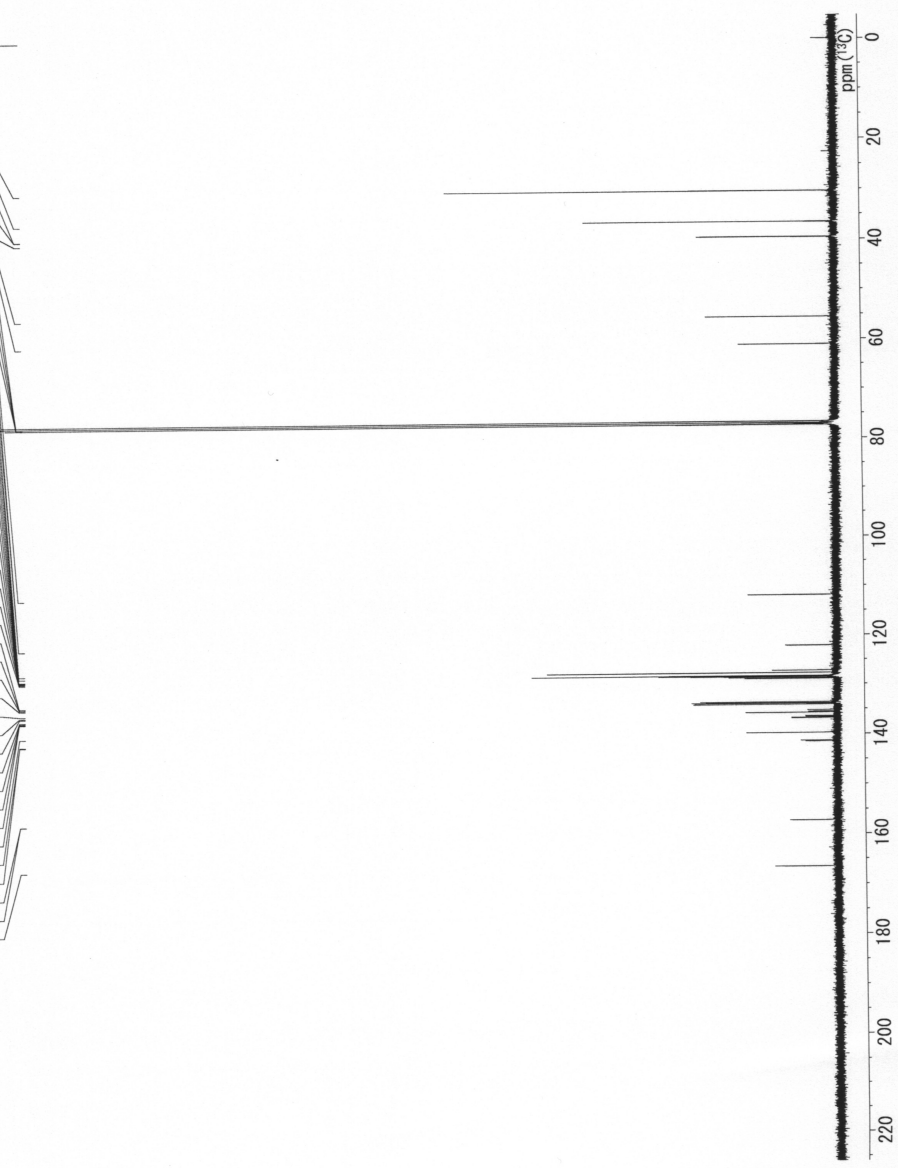

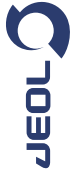

```
----- PROCESSING PARAMETERS -----  
sexp( 2.0[Hz], 0.0[s] )  
trapezoid( 0[%], 0[%], 80[%], 100[%] )  
set( file, ' ' )  
set( TRUE, TRUE )  
machinephase  
ppm
```

```
Filename = 22852p.jdf  
Author = root  
Experiment = zq9y30  
Sample_Id = Parameter file, TOPSPIN Ver  
Sample_Rev = 1  
Revision_Time = 12-APR-2019 13:43:28  
Comment = Parameter file, TOPSPIN Ver  
Data_Format = D COMPLEX  
Data_Size = 32768  
X_Domain = 31P  
X_Offset = 0 [Hz]  
X_Points = 32768  
Spectrometer = BRUKER DMX_NMR  
Field_Strength = 7.05156322[T] (300[MHz])  
X_Domain = 31P  
X_Offset = 535182[Mhz]  
X_Freq_Flip = TRUE  
X_Offset = 0 [Hz]  
X_Points = 32768  
X_Freqs = 38.5356647[Mhz]  
X_Temp = 8  
SCANS = 8  
Temp_Set = 300 [K]  
Filter_Factor = 3
```

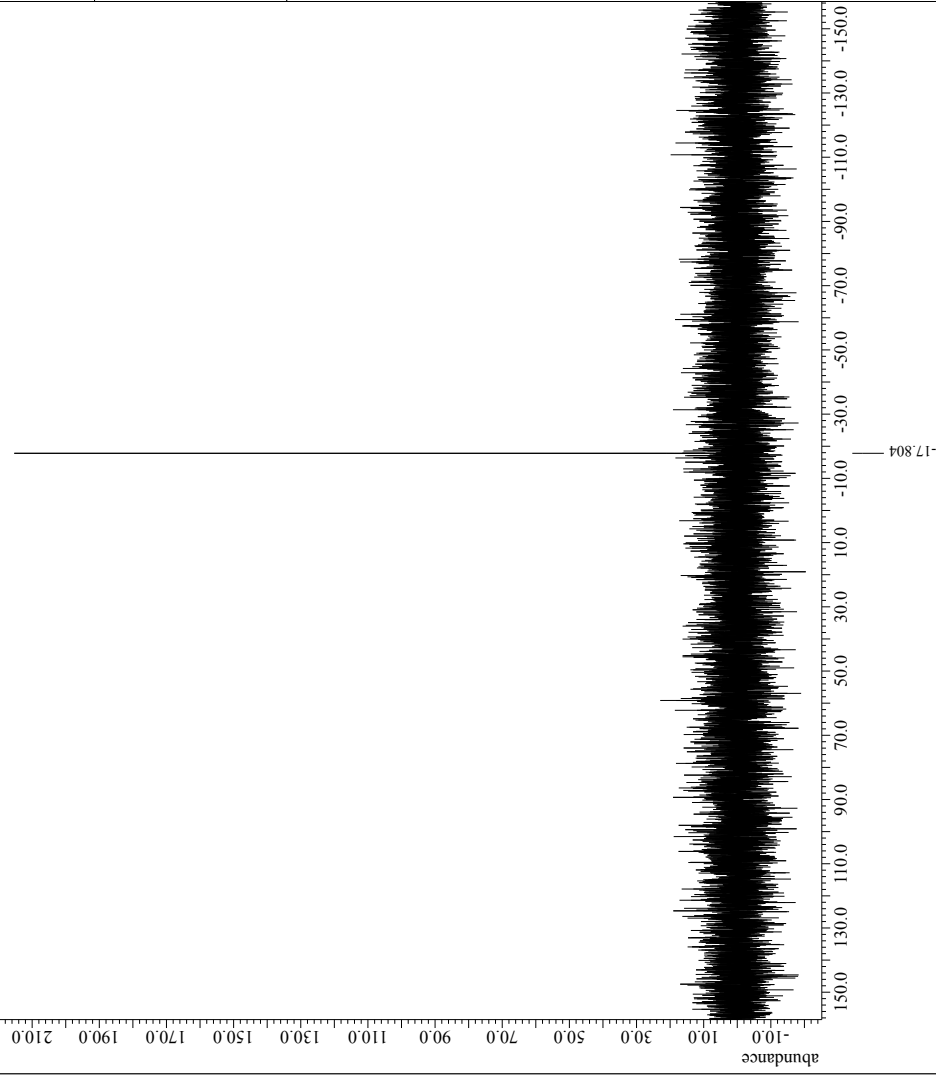

# クロマトグラム

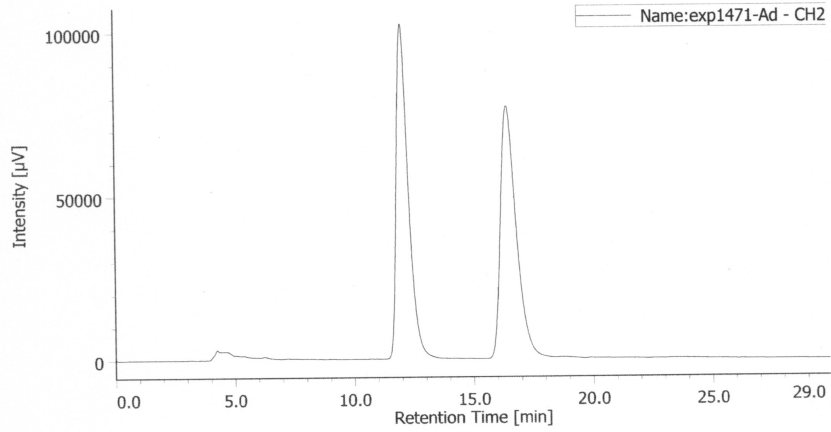

## クロマトグラム情報

|            |                               |
|------------|-------------------------------|
| ユーザー名      | 3385                          |
| 更新日時       | 2020/12/18 23:38:40           |
| コメント       | OD-H,1.0ml/min,Hex.2-Pro=98.2 |
| HPLC システム名 | HPLC-2                        |
| 測定日        | 2020/12/18 18:04:00           |
| 注入量        | 1.00 [μL]                     |
| サンプル#      | 1                             |
| プロジェクト名    | 2019system2                   |
| 取込時間       | 180.0 [min]                   |
| 測定シーケンス    | 2_466444 koki                 |
| コントロールメソッド | system2_2019                  |
| ピークIDテーブル  |                               |
| 検量線テーブル    |                               |
| 追加情報       |                               |

## チャンネル情報 + ピーク情報

|          |                |
|----------|----------------|
| クロマトグラム名 | exp1471-Ad-CH2 |
| サンプル名    |                |
| チャンネル名   | CD-2095-UV     |
| サンプリング間隔 | 500 [msec]     |
| 波形処理メソッド | (マニュアル)        |

# クロマトグラム

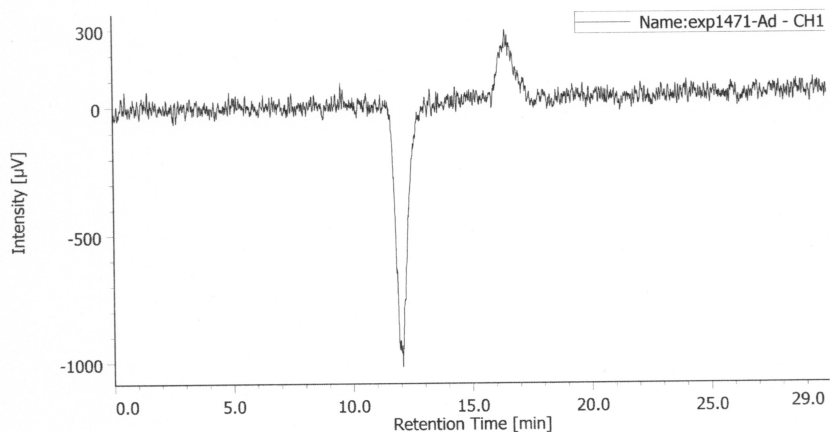

## クロマトグラム情報

|            |                               |
|------------|-------------------------------|
| ユーザー名      | 3385                          |
| 更新日時       | 2020/12/18 23:38:40           |
| コメント       | OD-H,1.0ml/min,Hex:2-Pro=98:2 |
| HPLC システム名 | HPLC-2                        |
| 測定日        | 2020/12/18 18:04:00           |
| 注入量        | 1.00 [μL]                     |
| サンプル#      | 1                             |
| プロジェクト名    | 2019system2                   |
| 取込時間       | 180.0 [min]                   |
| 測定シーケンス    | 2_466444 koki                 |
| コントロールメソッド | system2_2019                  |
| ピークIDテーブル  |                               |
| 検量線テーブル    |                               |
| 追加情報       |                               |

## チャンネル情報+ピーク情報

|          |                |
|----------|----------------|
| クロマトグラム名 | exp1471-Ad-CH1 |
| サンプル名    |                |
| チャンネル名   | CD-2095-CD     |
| サンプリング間隔 | 500 [msec]     |
| 波形処理メソッド |                |



<sup>1</sup>H, <sup>13</sup>C and <sup>31</sup>P NMR, and chiral phase HPLC chart of (±) -N-(Adamantan-2-yl)-N-(2-(diphenylphosphanyl)-6-methoxyphenyl)cinnamamide ((±)-**1b**)

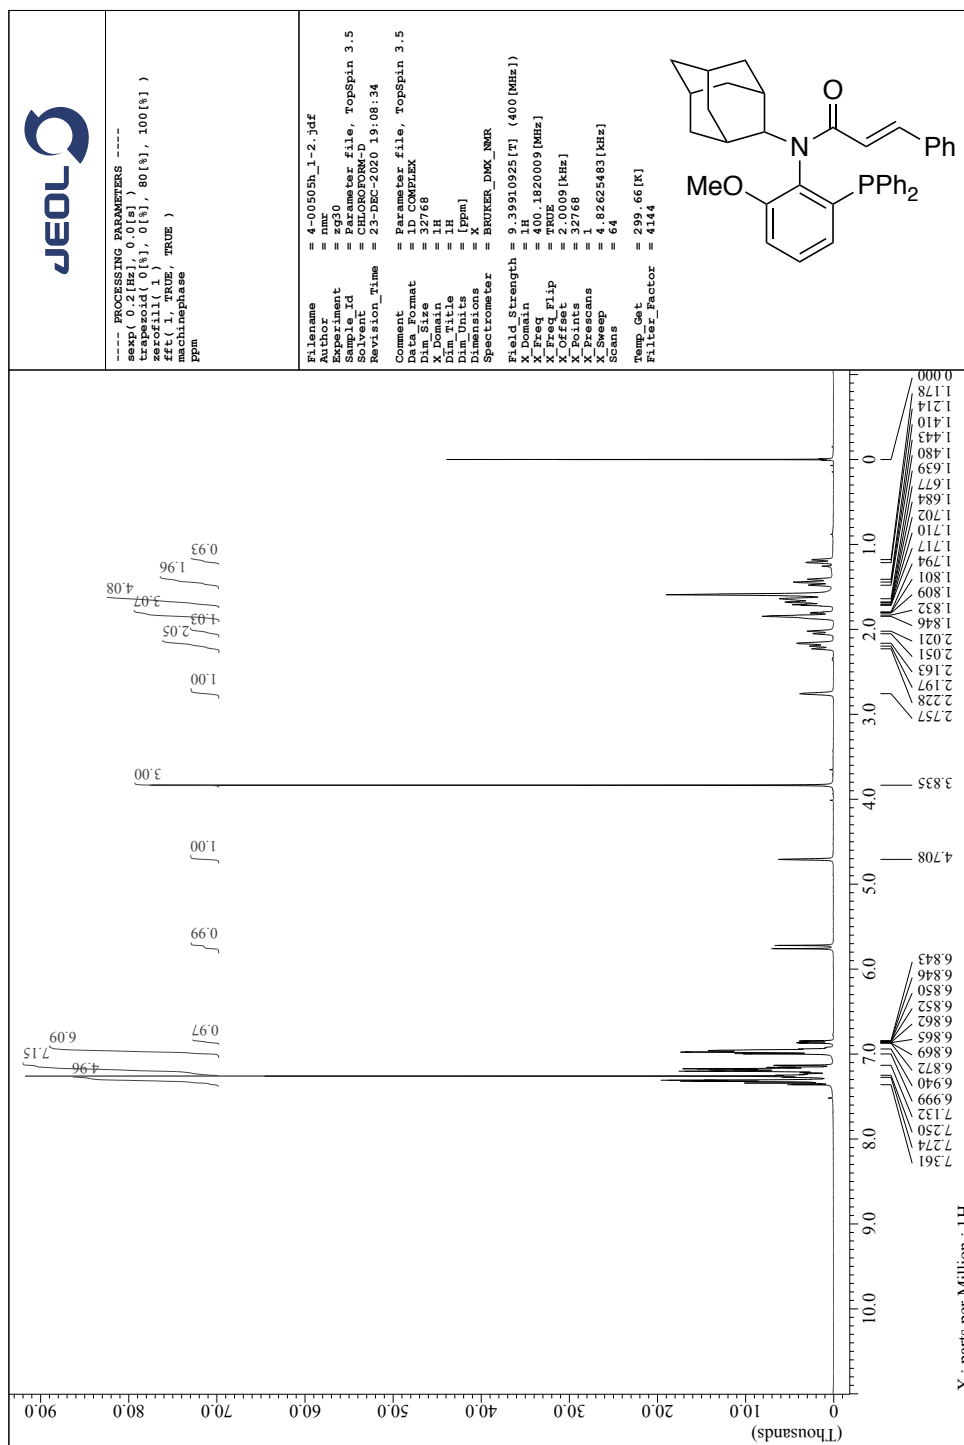



--- PROCESSING PARAMETERS ---  
sexp( 0.1[Hz], 0.0[s] )  
trapezoid( 0[%], 0[%], 80[%], 100[%] )  
zerofill( 0 )  
sfb( 0, TRUE, TRUE )  
machinephase  
ppm

Filename = 4-0859c\_1-6.jdf  
Author = nmz  
Experiment = zpgj30  
Sample file, TopSpin 3.5  
Solvent = CHLOROFORM-D  
Revision\_Time = 9-Jan-2001 18:08:00  
Comment = Parameter file, TopSpin 3.5  
Date\_Format = DD.MM.YYYY  
Data\_Size = 128 MB  
X\_Domain = 13C  
X\_Freq = 100.62640982  
X\_Offset = 11.0687881  
X\_Points = 32768  
X\_Prescans = 2  
X\_Sweep = 24.03846154 [KHz]  
Scans = 256  
Temp\_Get = 297.36 [K]  
Filter\_Factor = 832

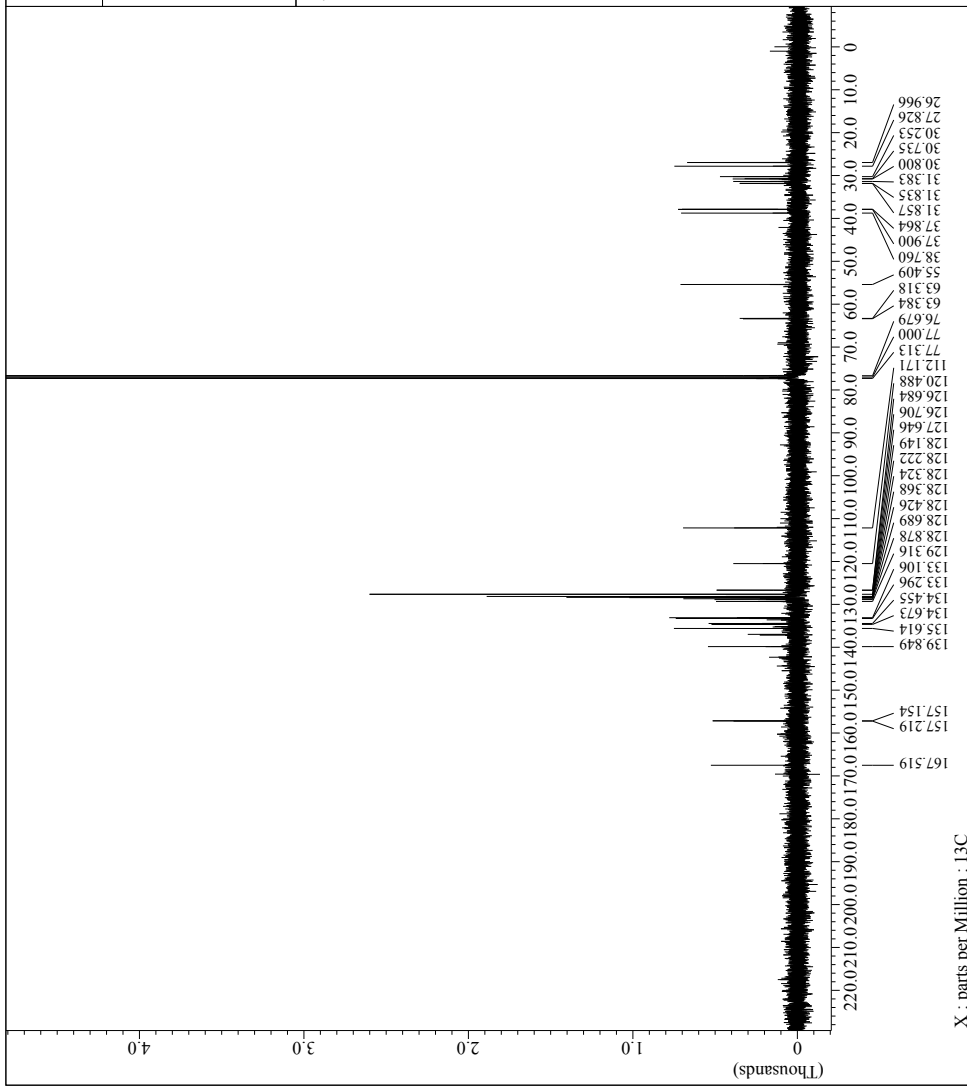



```
----- PROCESSING PARAMETERS -----
sexp( 2.0[Hz], 0.0[s] )
trapezoid( 0[%], 0[%], 80[%], 100[%] )
zerofill( )
sfb( 0[bits], TRUE )
machinephase
ppm
```

```
Filename = 2329p_1-2_1.fdf
Author = nmrsu
Experiment = zpg30
Parameter file, TopSpin 3.5
Sample_Id = CHURCOB-D
Solvent = 15_OHR-201_16:46:36
Revision_Time =
Comment = Parameter file, TopSpin 3.5
Data_Format = ID_COMPLEX
Data_Size = 37.66
Data_Units = 31P
Dim_Title = [ppm]
Dim_Units = X
Dimensions = X
Spectrometer = BRUKER_DMG_NMR
Field Strength = 9.39793489[T] (400[MHz])
X_Domain = 31P
X_Freq = 161.975595[MHz]
X_P1 = 0[Hz]
X_Offset = 0[Hz]
X_Points = 32768
X_Frescans = 1
X_Sweep = 51.02040816[MHz]
Scans = 8
Temp_Get = 289.3[K]
Filter_Factor = 392
```

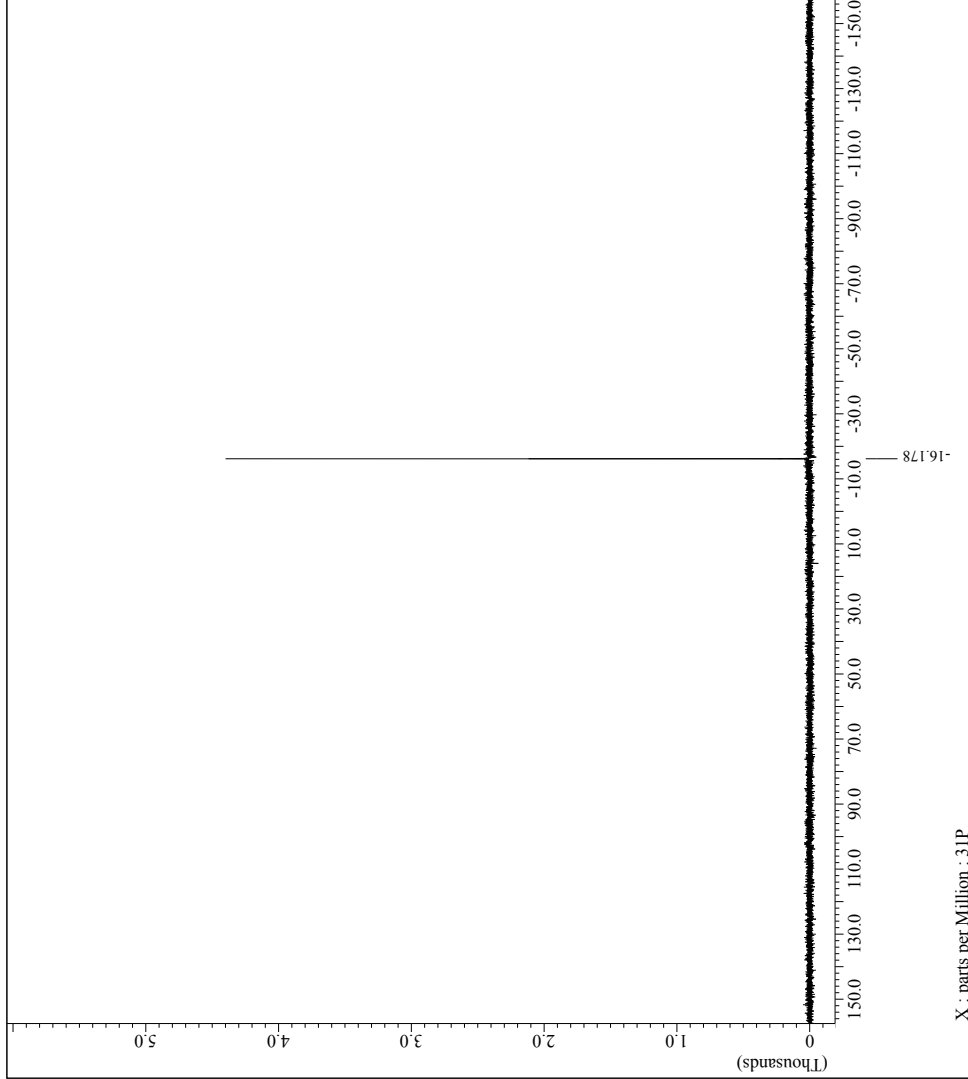

X : parts per Million : 31P

# クロマトグラム

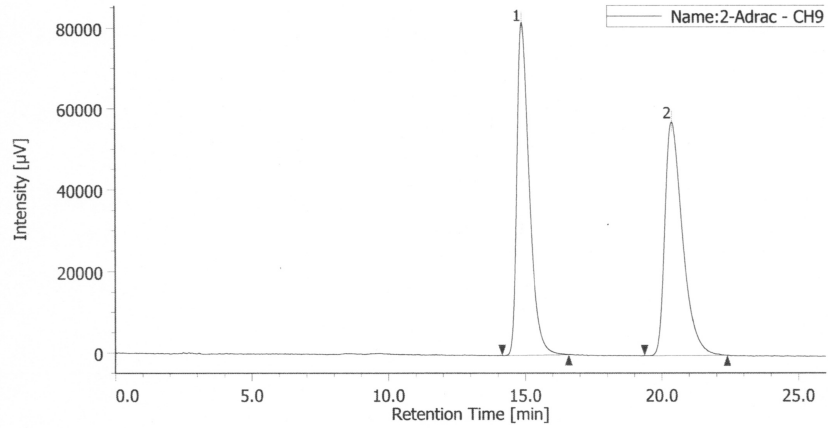

**クロマトグラム情報**  
 ユーザー名 3385  
 更新日時 2021/01/18 20:58:39  
 コメント IA,1.5ml/min,Hex:2-Pro=98.2  
 HPLC システム名 HPLC-2  
 測定日 2021/01/18 19:55:05  
 注入量 1.00 [μL]  
 サンプル# 1  
 プロジェクト名 2019system2  
 取込時間 180.0 [min]  
 測定シーケンス 2\_466463 koki  
 コントロールメソッド system2\_2019  
 ピークIDテーブル  
 検量線テーブル  
 追加情報

**チャンネル情報+ピーク情報**  
 クロマトグラム名 2-Adrac-CH9  
 サンプル名  
 チャンネル名 270.0nm  
 サンプリング間隔 200 [msec]  
 波形処理メソッド (マニュアル)

| # | ピーク名    | CH | tR [min] | 面積 [μV·sec] | 高さ [μV] | 面積%    | 高さ%    | 定量値 | NTP  | 分離度   | シメトリ係数 | 警告 |
|---|---------|----|----------|-------------|---------|--------|--------|-----|------|-------|--------|----|
| 1 | Unknown | 9  | 14.893   | 2584699     | 81897   | 50.083 | 58.820 | N/A | 5537 | 5.647 | 1.446  |    |
| 2 | Unknown | 9  | 20.383   | 2576140     | 57335   | 49.917 | 41.180 | N/A | 5034 | N/A   | 1.500  |    |

# クロマトグラム

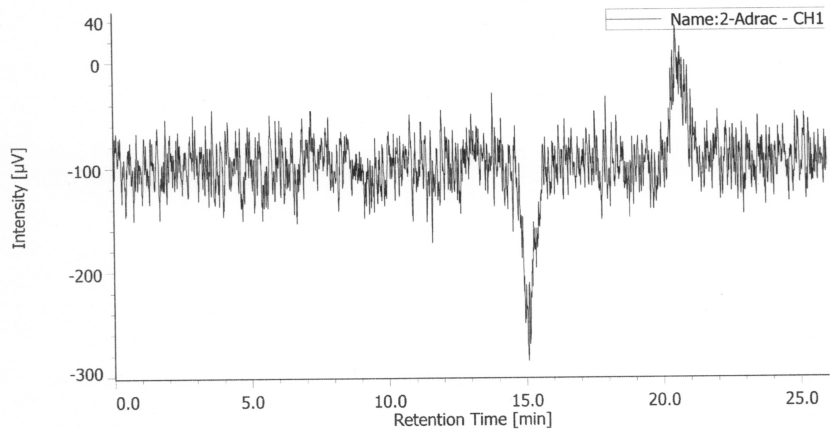

## クロマトグラム情報

|            |                             |
|------------|-----------------------------|
| ユーザー名      | 3385                        |
| 更新日時       | 2021/01/18 20:58:39         |
| コメント       | IA.1.5ml/min,Hex:2-Pro=98:2 |
| HPLC システム名 | HPLC-2                      |
| 測定日        | 2021/01/18 19:55:05         |
| 注入量        | 1.00 [μL]                   |
| サンプル#      | 1                           |
| プロジェクト名    | 2019system2                 |
| 取込時間       | 180.0 [min]                 |
| 測定シーケンス    | 2_466463 koki               |
| コントロールメソッド | system2_2019                |
| ピークIDテーブル  |                             |
| 検量線テーブル    |                             |
| 追加情報       |                             |

## チャンネル情報+ピーク情報

|          |             |
|----------|-------------|
| クロマトグラム名 | 2-Adrac-CH1 |
| サンプル名    |             |
| チャンネル名   | CD-2095-CD  |
| サンプリング間隔 | 500 [msec]  |
| 波形処理メソッド |             |

$^1\text{H}$ ,  $^{13}\text{C}$  and  $^{31}\text{P}$  NMR, and chiral phase HPLC chart of ( $\pm$ )-*N*-(Cyclohexyl)-*N*-(2-(diphenylphosphanyl)-6-methoxyphenyl)cinnamamide ( $\pm$ )-**1c**

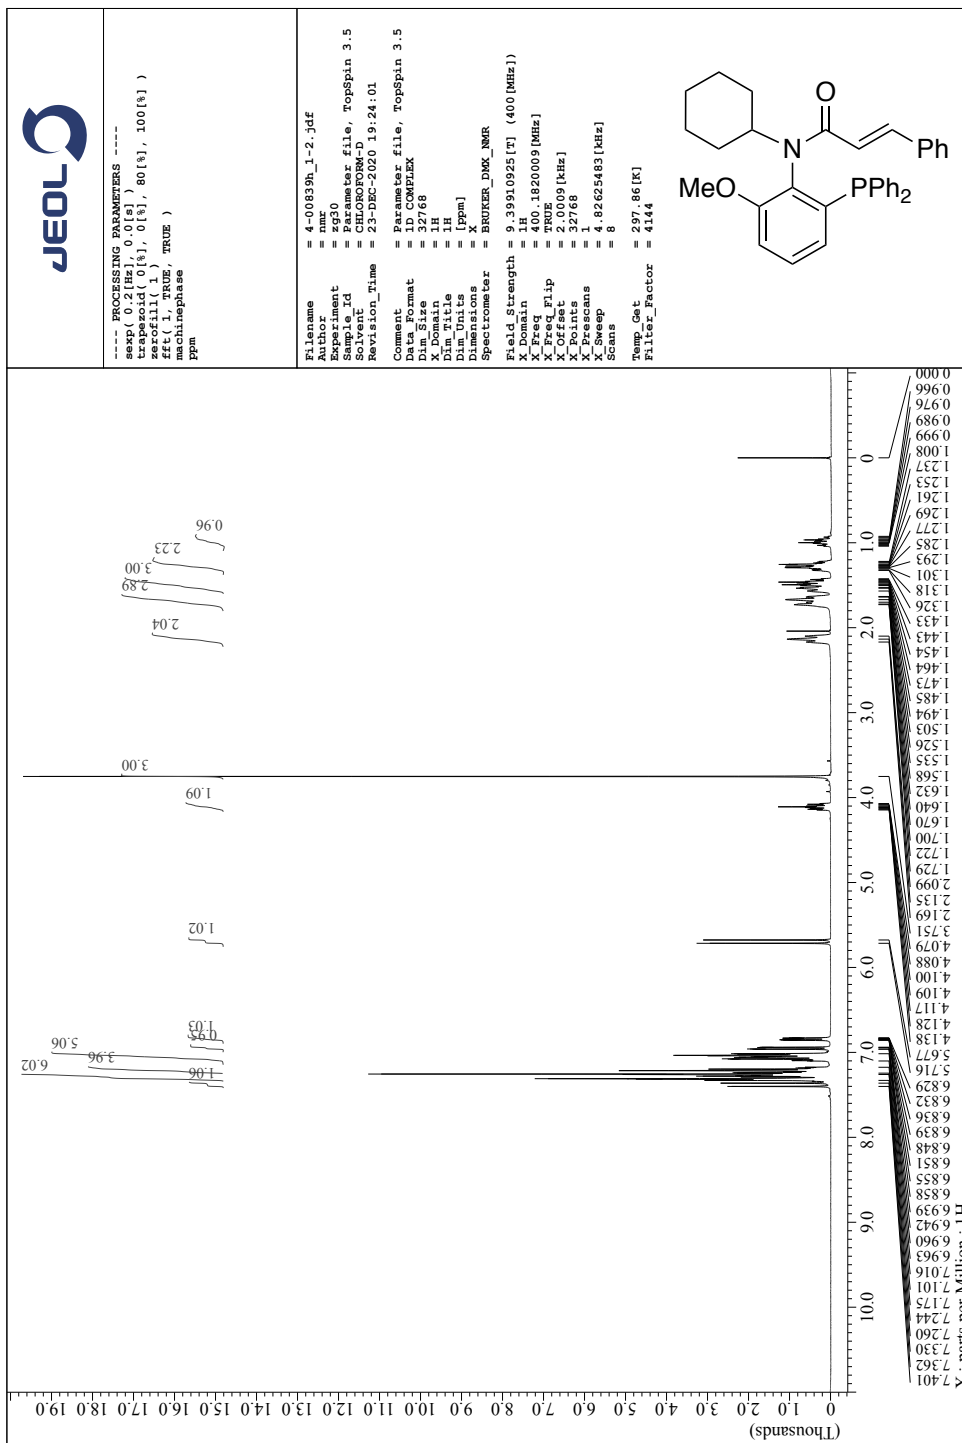

DFILF C:\VVOUSEI6\NMR\06MIN0202  
 04-0086.CY1\F1.d  
 DATIM 18/Sep/2020 00:01:03  
 COMNT  
 13C  
 ORNUC Z6PG30  
 EXMOD 100.63 MHz  
 OBFRQ 0.0 MHz  
 OBSET 11066.5 Hz  
 OBFIN 131072 (ZeroFi  
 POINT 11: x4)  
 FREQU 24038.46 Hz  
 SCANS 256  
 ACQTM 1.3631 s  
 PD 2.0 s  
 PW1 10.0  $\mu$ s  
 IRNUC OFF  
 PROBHD Z108618\_0111 (PA.BBO 4  
 OOS1 BBF-H-D-05 Z PLUS)  
 INSTRUM SPECT  
 PULSPRG  
 GRDPRG  
 CTEMP 24.21  $^{\circ}$ C  
 SOLVENT CDCl<sub>3</sub>  
 EXREF 77.0 ppm  
 F2 0.25 Hz  
 WINDOW Exponential  
 RGAIN 203  
 Operator:

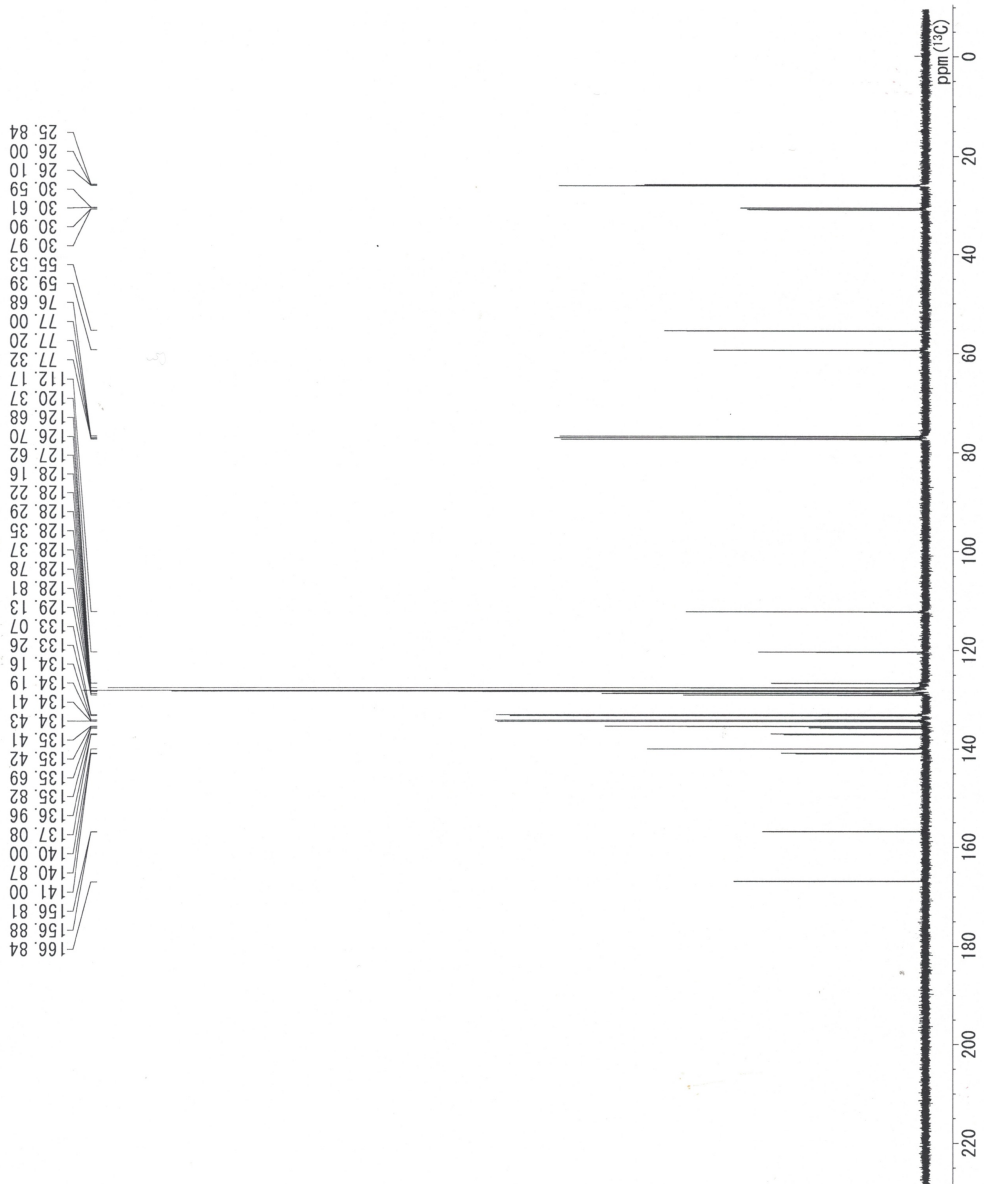



```
--- PROCESSING PARAMETERS ---  
sexp( 2.0[Hz], 0.0[s] )  
trapezoid( 0[%], 0[%], 80[%], 100[%] )  
zerofill( 0 )  
shift( 0, TRUE, TRUE )  
machinephase  
ppm
```

```
Filename = 4-0839p_1-1.jdf  
Author = nmc  
Experiment = zpgq30  
Sample_Id = Parameter file, TopSpin 3.5  
Solvent = H2O@300  
Revision_Time = 27-OCT-2020 19:48:17  
Comment = Parameter file, TopSpin 3.5  
Data_Format = 1D, COMPLEX  
Data_Size = 32768  
X_Domain = 31P  
Dim_Title = 31P  
Dim_Units = [ppm]  
Dimensions = X  
Spectrometer = BRUKER_DMG_NMR  
Field_Strength = 9.39910925[T] (400[MHz])  
X_Domain = 31P  
X_Freq = 161.995835[MHz]  
X_P1 = 1000000000  
X_Offset = 0[Hz]  
X_Points = 32768  
X_Frescans = 1  
X_Sweep = 51.02040816[MHz]  
Scans = 8  
Temp_Get = 297.96[K]  
Filter_Factor = 392
```

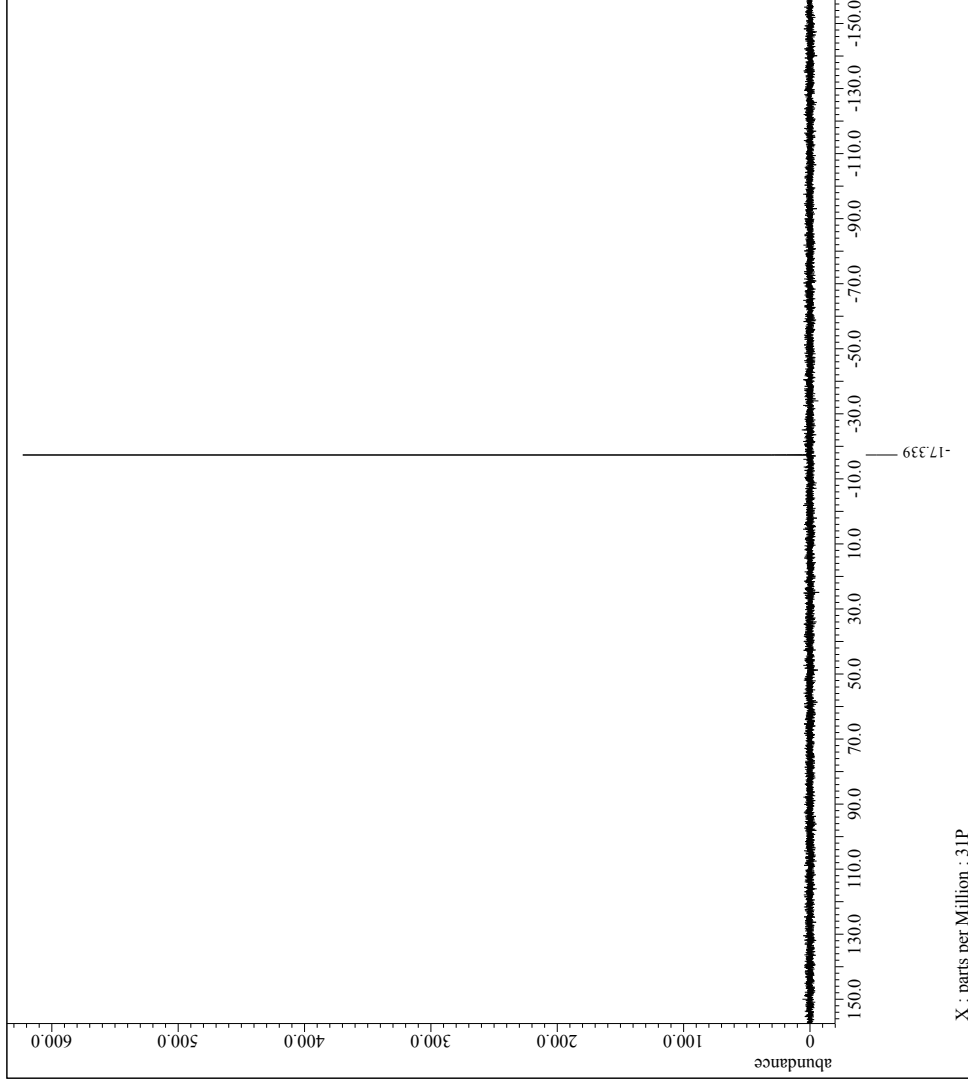



# クロマトグラム

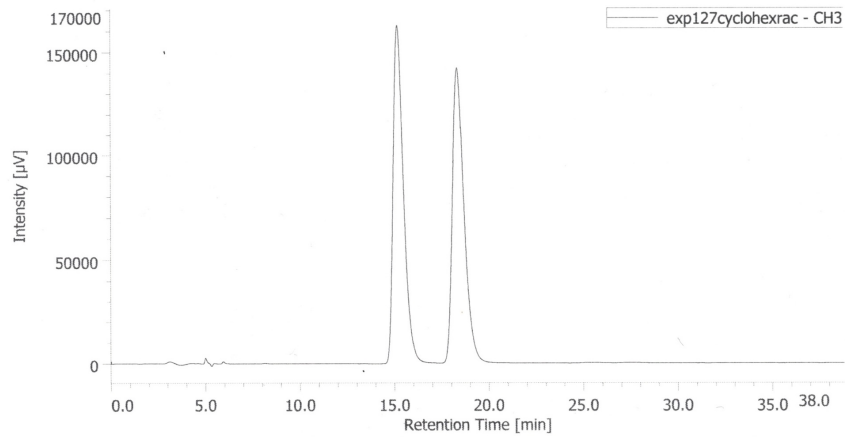

クロマトグラム情報  
ユーザー名 3385  
更新日時 2020/09/17 17:07:59  
コメント OD-H, 0.8 mL/min, hex:2-Pro=98:2  
HPLC システム名 SYSTEM-3  
測定日 2020/09/17 16:29:09  
注入量 1.0 [μL]  
サンプル# 1  
プロジェクト名 2019system3  
取込時間 180.0 [min]  
測定シーケンス 3-650 koki  
コントロールメソッド 2019system3  
ピークIDテーブル  
検量線テーブル  
追加情報

チャンネル情報+ピーク情報  
クロマトグラム名 exp127cyclohexrac-CH3  
サンプル名  
チャンネル名 UV-2075  
サンプリング間隔 500 [msec]  
波形処理メソッド

## クロマトグラム

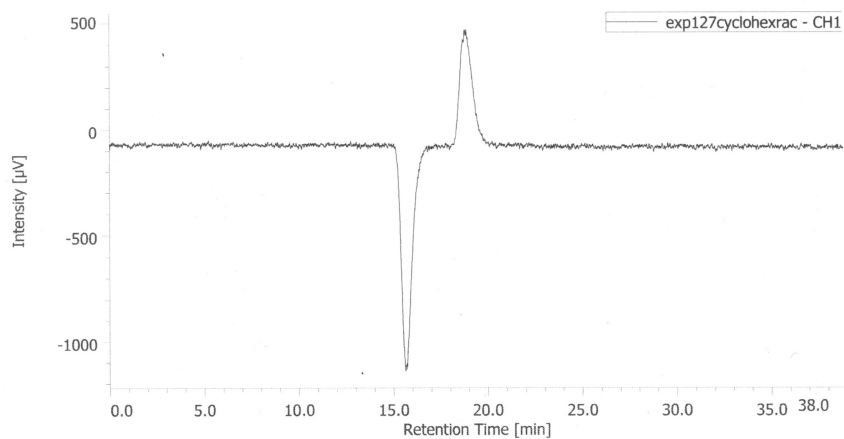

### クロマトグラム情報

|            |                                  |
|------------|----------------------------------|
| ユーザー名      | 3385                             |
| 更新日時       | 2020/09/17 17:07:59              |
| コメント       | OD-H. 0.8 mL/min, hex:2-Pro=98:2 |
| HPLC システム名 | SYSTEM-3                         |
| 測定日        | 2020/09/17 16:29:09              |
| 注入量        | 1.0 [μL]                         |
| サンプル#      | 1                                |
| プロジェクト名    | 2019system3                      |
| 取込時間       | 180.0 [min]                      |
| 測定シーケンス    | 3-650 koki                       |
| コントロールメソッド | 2019system3                      |
| ピークIDテーブル  |                                  |
| 検量線テーブル    |                                  |
| 追加情報       |                                  |

### チャンネル情報+ピーク情報

|          |                       |
|----------|-----------------------|
| クロマトグラム名 | exp127cyclohexrac-CH1 |
| サンプル名    |                       |
| チャンネル名   | CD-2095_CD            |
| サンプリング間隔 | 500 [msec]            |
| 波形処理メソッド |                       |

$^1\text{H}$ ,  $^{13}\text{C}$  and  $^{31}\text{P}$  NMR, and chiral phase HPLC chart of (-)-*N*-(Adamantan-1-yl)-*N*-(2-(diphenylphosphaneyl)-6-methoxyphenyl)cinnamamide ((-)-**1a**)

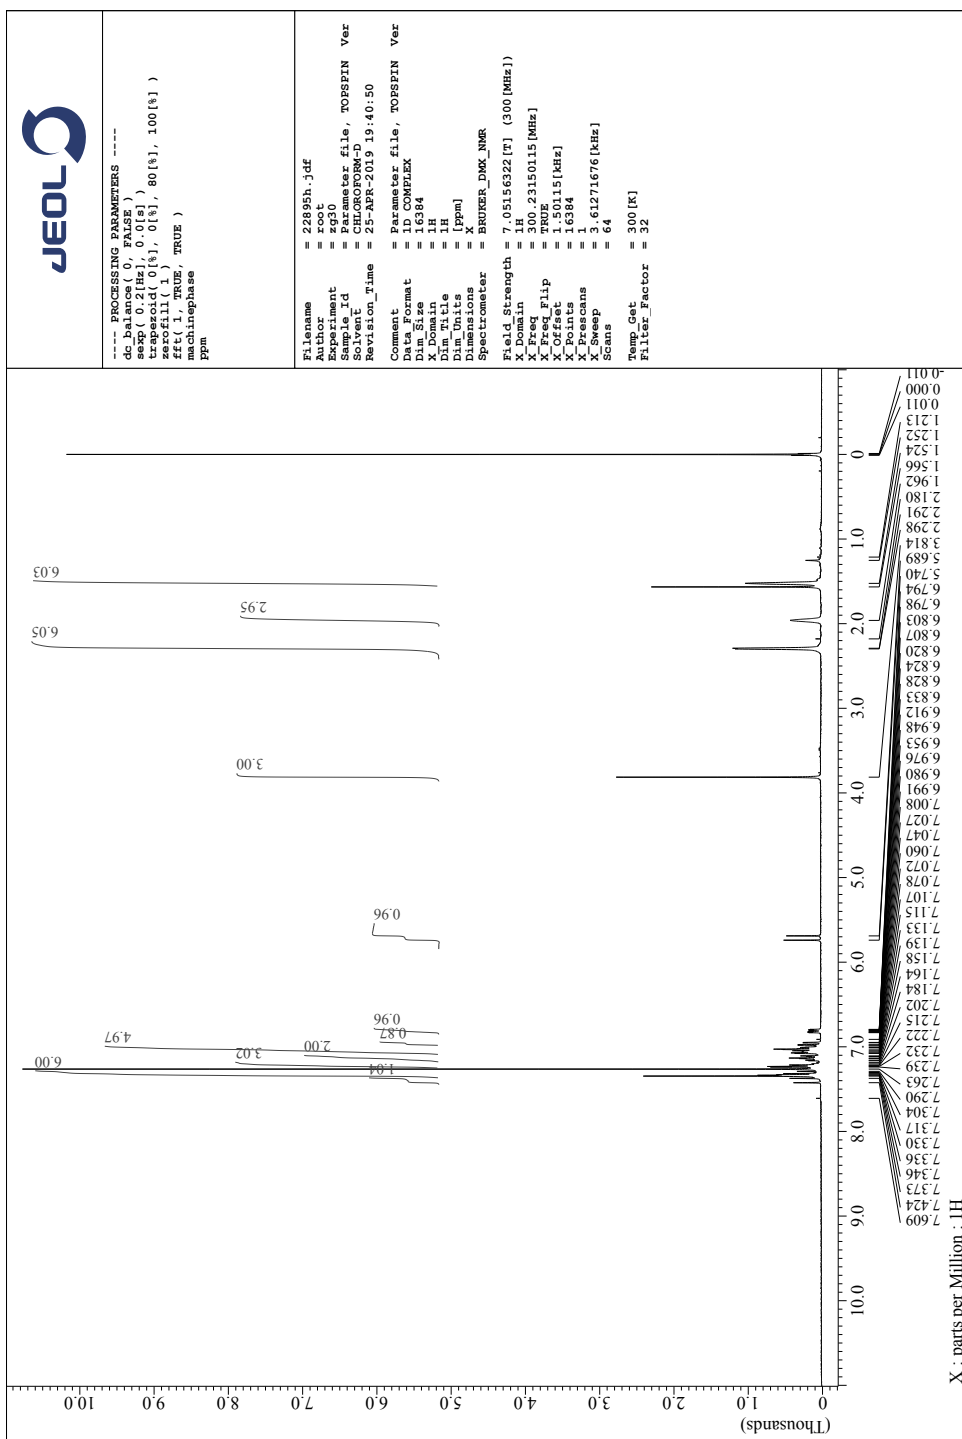

DPFILE C:\VYOUSEI\NMR\06\IN0201  
 84-0035CV1111d  
 DATE 29/Jun/2019 18:49:26  
 COM1  
<sup>13</sup>C  
 ZGPC30  
 EXMOD 100.63 MHz  
 OBFREQ 0.0 kHz  
 OBSET 11066.5 Hz  
 OBFIN 131072 (ZeroF1  
 POINT 1:\*)  
 FREQ1 24038.46 Hz  
 SCANS 512  
 ACQTM 1.3631 s  
 PD 2.0 s  
 PW1 10.0 μs  
 TRNLC OFF  
 PROBD 2108618.0111 (PA BBO 4  
 OOS1 BFF-H-D-05.Z PLUS)  
 INST100  
 PULPROG  
 GRDPRG  
 CTEMP 25.21 °C  
 SLVNT CDCL3  
 EXREF 77.0 ppm  
 BF 0.25 Hz  
 WINDOW Exponential  
 RGAIN 203  
 Operator

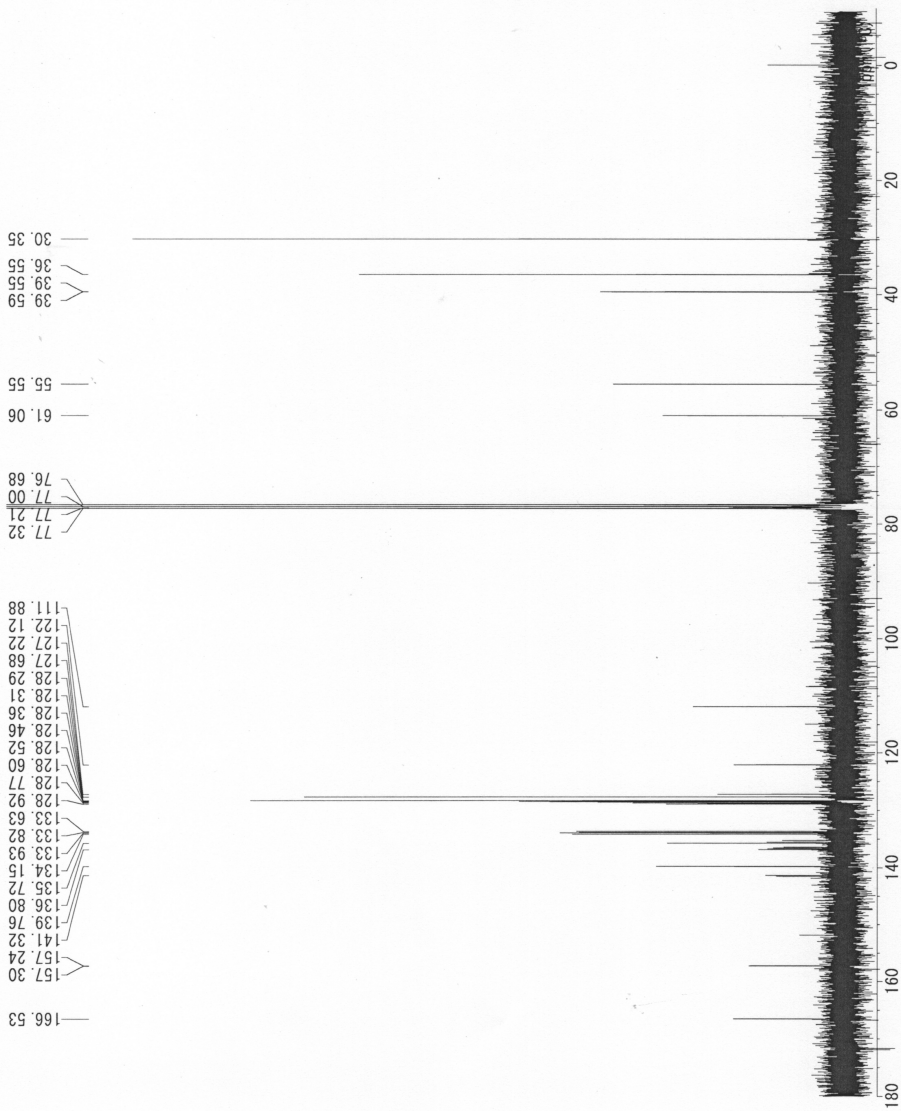



```
----- PROCESSING PARAMETERS -----  
sexp( 2.0[Hz], 0.0[s] )  
trapezoid( 0[%], 0[%], 80[%], 100[%] )  
set( file, ' ' )  
set( TRUE, TRUE )  
machinephase  
ppm
```

```
Filename = 22899p.jdf  
Author = root  
Experiment = zq9q30  
Sample_Id = Parameter file, TOPSPIN Ver  
Spectrum = 22899p.jdf  
Revision_Time = 12-APR-2019 13:49:30  
Comment = Parameter file, TOPSPIN Ver  
Data_Format = D COMPLEX  
S = 68  
X_Domain = 31P  
Dim_Title = 31P  
Dim_Units = [ppm]  
Spectrum = BRUKER DMX_NMR  
Field_Strength = 7.05156322[T] (300[MHz])  
X_Domain = 31P 535182[MHz]  
X_Offset = TRUE  
X_Freq_Flip = TRUE  
X_Offset = 0[Hz]  
X_Points = 32768  
X_Fscans = 8  
X_Temp = 38.53566457[KHz]  
SCANS = 8  
Temp_Get = 300[K]  
Filter_Factor = 3
```

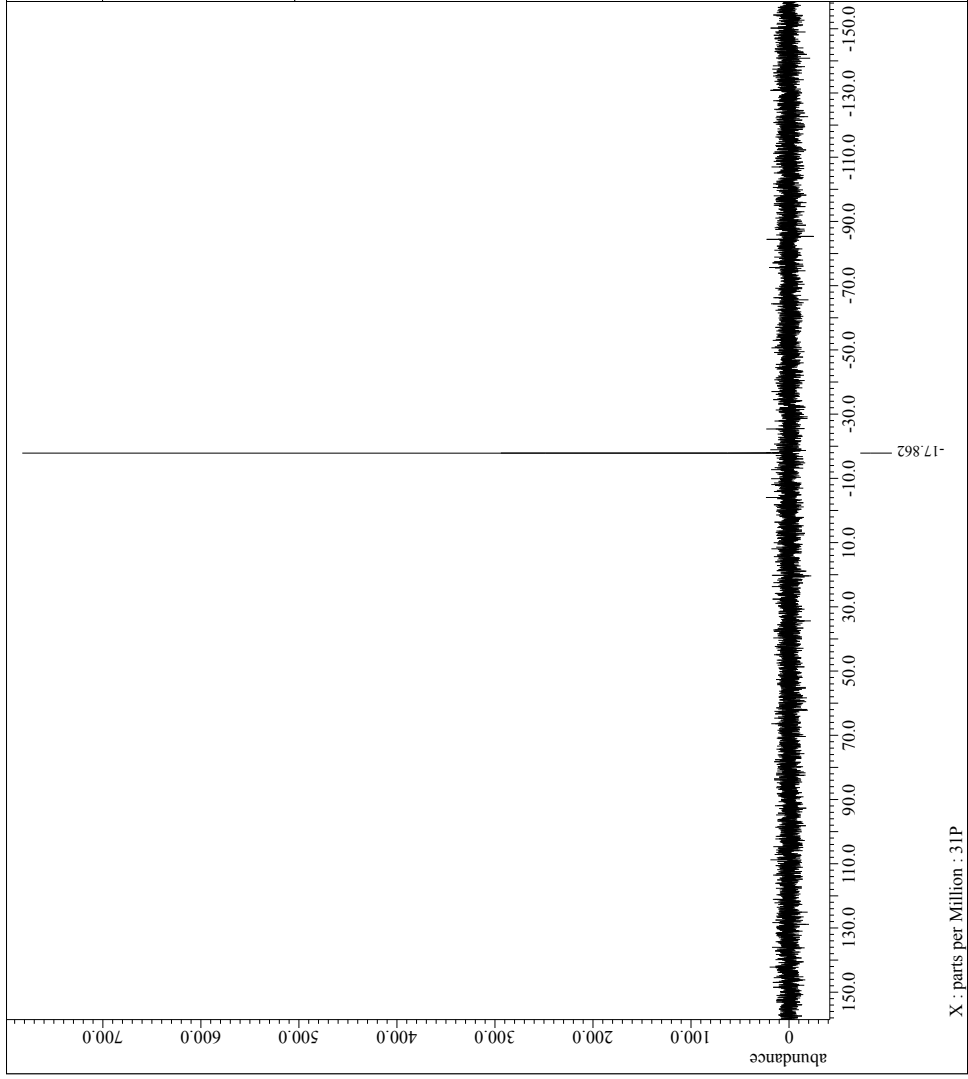

# クロマトグラム

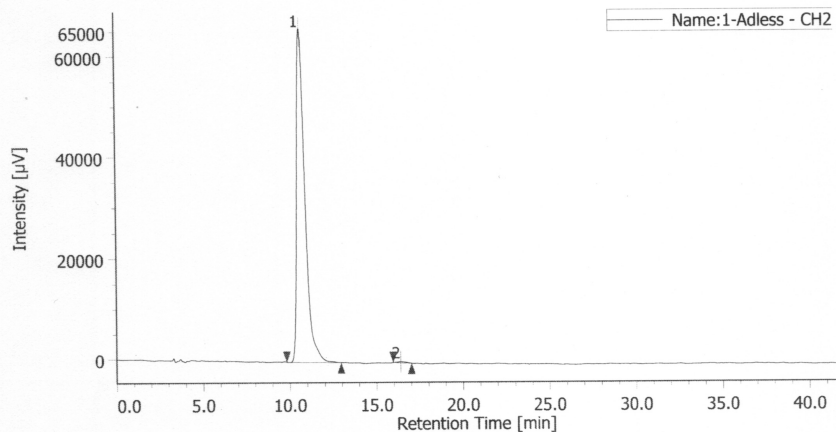

**クロマトグラム情報**  
 ユーザー名 3385  
 更新日時 2021/01/20 13:26:18  
 コメント OD-H,1.0ml/min,Hex:2-Pro=98:2  
 HPLC システム名 HPLC-2  
 測定日 2021/01/20 12:44:44  
 注入量 1.00 [μL]  
 サンプル# 1  
 プロジェクト名 2019system2  
 取込時間 180.0 [min]  
 測定シーケンス 2\_466471 koki  
 コントロールメソッド system2\_2019  
 ピークIDテーブル  
 検量線テーブル  
 追加情報

**チャンネル情報+ピーク情報**  
 クロマトグラム名 1-Adless-CH2  
 サンプル名  
 チャンネル名 CD-2095-UV  
 サンプル間隔 500 [msec]  
 波形処理メソッド (マニュアル)

| # | ピーク名    | CH | tR [min] | 面積 [μV·sec] | 高さ [μV] | 面積%    | 高さ%    | 定量値 | NTP  | 分離度   | シメトリ係数 | 警告    |
|---|---------|----|----------|-------------|---------|--------|--------|-----|------|-------|--------|-------|
| 1 | Unknown | 2  | 10.683   | 2141953     | 66196   | 99.667 | 99.678 | N/A | 2793 | 6.356 |        | 1.492 |
| 2 | Unknown | 2  | 16.392   | 7166        | 214     | 0.333  | 0.322  | N/A | 4365 | N/A   |        | 1.205 |

# クロマトグラム

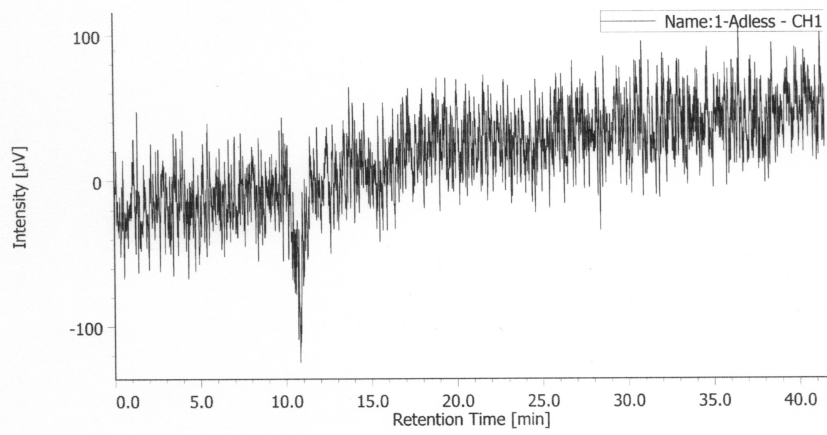

## クロマトグラム情報

|            |                               |
|------------|-------------------------------|
| ユーザー名      | 3385                          |
| 更新日時       | 2021/01/20 13:26:18           |
| コメント       | OD-H,1.0ml/min,Hex:2-Pro=98:2 |
| HPLC システム名 | HPLC-2                        |
| 測定日        | 2021/01/20 12:44:44           |
| 注入量        | 1.00 [µL]                     |
| サンプル#      | 1                             |
| プロジェクト名    | 2019system2                   |
| 取込時間       | 180.0 [min]                   |
| 測定シーケンス    | 2_466471 koki                 |
| コントロールメソッド | system2_2019                  |
| ピークIDテーブル  |                               |
| 検量線テーブル    |                               |
| 追加情報       |                               |

## チャンネル情報+ピーク情報

|          |              |
|----------|--------------|
| クロマトグラム名 | 1-Adless-CH1 |
| サンプル名    |              |
| チャンネル名   | CD-2095-CD   |
| サンプリング間隔 | 500 [msec]   |
| 波形処理メソッド |              |

<sup>1</sup>H, <sup>13</sup>C and <sup>31</sup>P NMR, and chiral phase HPLC chart of (+)-N-(Adamantan-1-yl)-N-(2-(diphenylphosphanyl)-6-methoxyphenyl)cinnamamide ((+)-**1a**)

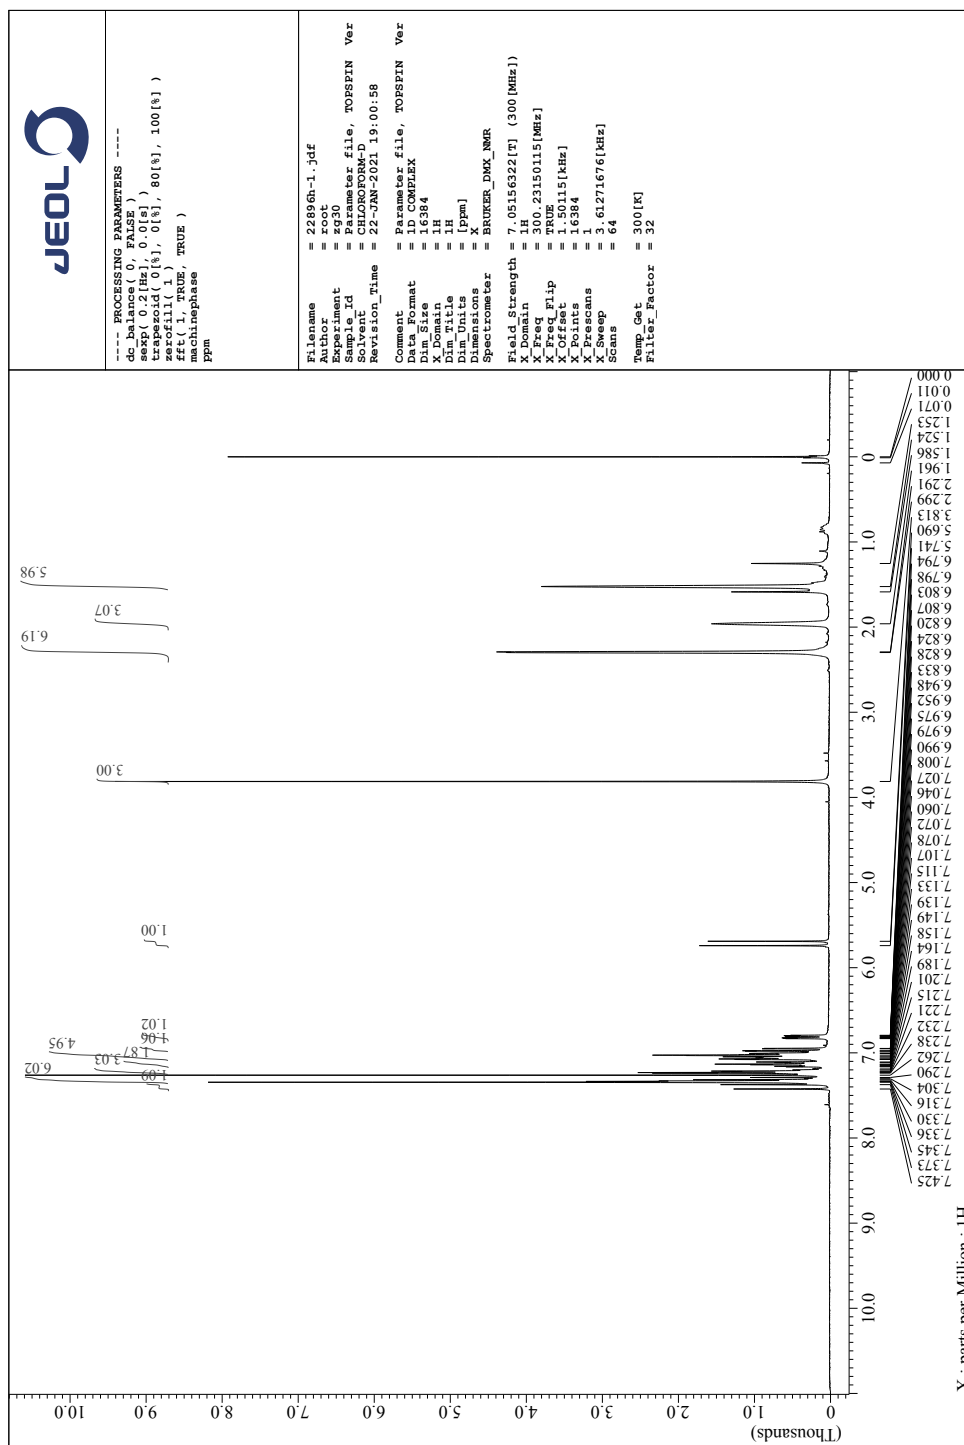



DFILE C:\KYOU\SEI\6NRV06\MINO201  
 874-00381C\1\Fid  
 DATIM 05/Mar/2019 21:22:06  
 COMNT  
 OBNUC <sup>13</sup>C  
 EXMOD ZGPC30  
 OBFREQ 100.63 MHz  
 OBSET 0.0 kHz  
 OBFIN 11066.5 Hz  
 POINT 131072 (ZeroF1  
 11:~4)  
 FREQU 24038.46 Hz  
 SCANS 1024  
 PCQTM 1.3631 s  
 PUL 2.0 s  
 PW 10.0  $\mu$ s  
 IRENUC OFF  
 PROGRD 7108618.0111 (PA BB0 4  
 00S1 BBF-H-D-05.7 PLUS)  
 SPECT  
 INSTRUM  
 PULPROG  
 GROPROC  
 CTEMP 25.71  $^{\circ}$ C  
 SLVNT CDCl<sub>3</sub>  
 EXREF 77.0 ppm  
 BF 0.25 Hz  
 WINDOW Exponential  
 RGAIN 203  
 Operator \_\_\_\_\_

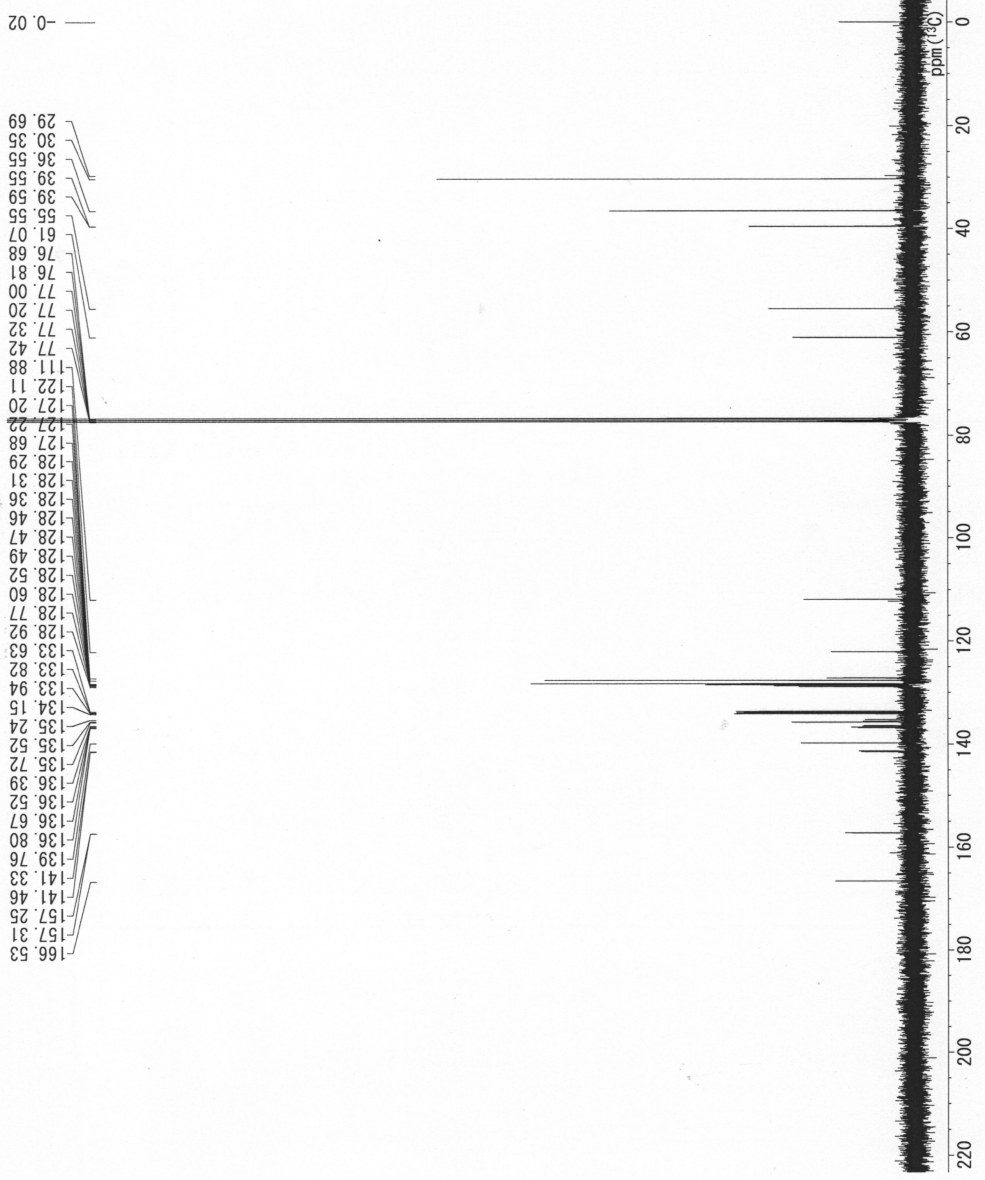



```
----- PROCESSING PARAMETERS -----  
sexp( 2.0[Hz], 0.0[s] )  
trapezoid( 0[%], 0[%], 80[%], 100[%] )  
setfill( )  
set( TRUE, TRUE )  
machinename  
ppm
```

```
Filename = 22896p.jdf  
Author = root  
Experiment = zq9q30  
Sample_Id = Parameter file, TOPSPIN Ver  
Spectrum = 22896p.jdf  
Revision_Time = 12-APR-2019 13:45:57  
Comment = Parameter file, TOPSPIN Ver  
Data_Format = D COMPLEX  
S = 32768  
X_Domain = 31P  
Dim_1 = 31P  
Dim_Title = [ppm]  
Dim_Units = [ppm]  
Dimension = 1  
Spectrum = BRUKER_DMX_NMR  
Field_Strength = 7.05156322[T] (300[MHz])  
X_Domain = 31P  
X_Offset = 535182[MHz]  
X_Freq_Flip = TRUE  
X_Offset = 0[Hz]  
X_Points = 32768  
X_Freqs = 38.53566457[MHz]  
X_Scans = 8  
Temp_Get = 300[K]  
Filter_Factor = 3
```

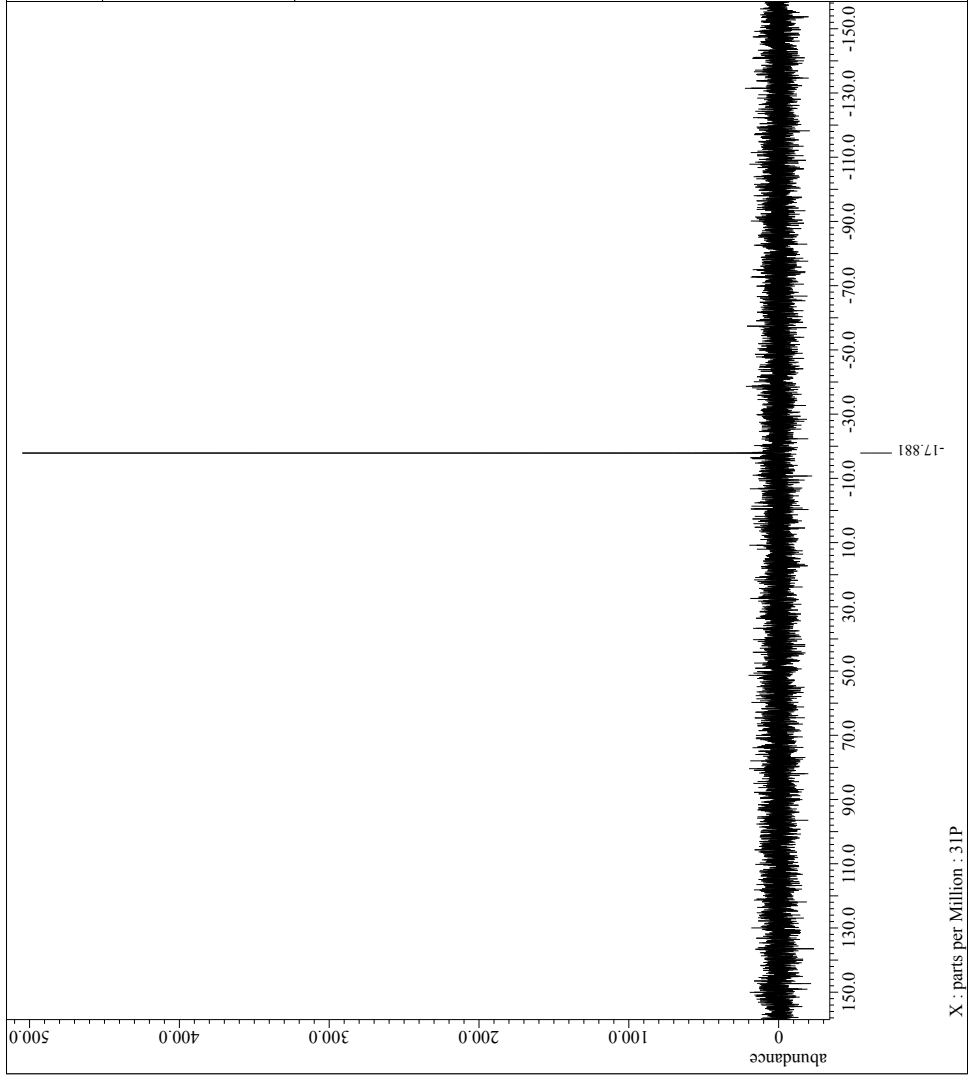

X : parts per Million : 31P

# クロマトグラム

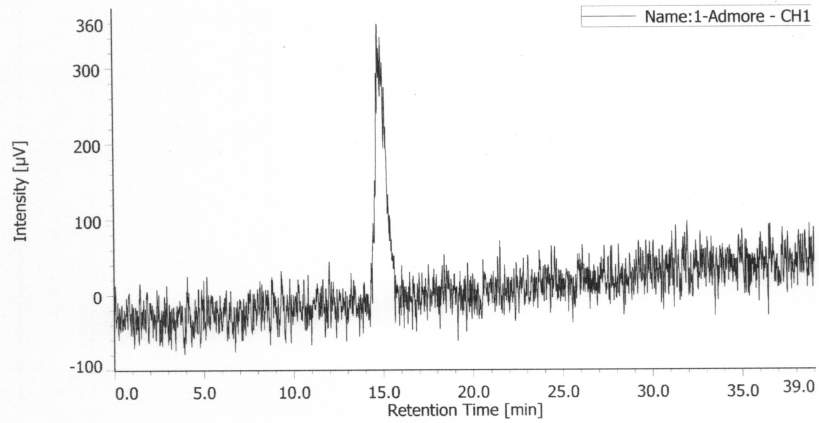

クロマトグラム情報  
ユーザー名 3385  
更新日時 2021/01/19 15:51:20  
コメント OD-H,1.0ml/min,Hex:2-Pro=98.2  
HPLC システム名 HPLC-2  
測定日 2021/01/19 15:12:16  
注入量 1.00 [μL]  
サンプル# 1  
プロジェクト名 2019system2  
取込時間 180.0 [min]  
測定シーケンス 2\_466465 koki  
ピークIDテーブル system2\_2019  
検量線テーブル  
追加情報

チャンネル情報+ピーク情報  
クロマトグラム名 1-Admore-CH1  
サンプル名  
チャンネル名 OD-2095-CD  
サンプリング間隔 500 [msec]  
波形処理メソッド

$^1\text{H}$ ,  $^{13}\text{C}$  and  $^{31}\text{P}$  NMR, and chiral phase HPLC chart of (+)-*N*-(Adamantan-2-yl)-*N*-(2-(diphenylphosphaneyl)-6-methoxyphenyl)cinnamamide ((+)-**1b**)

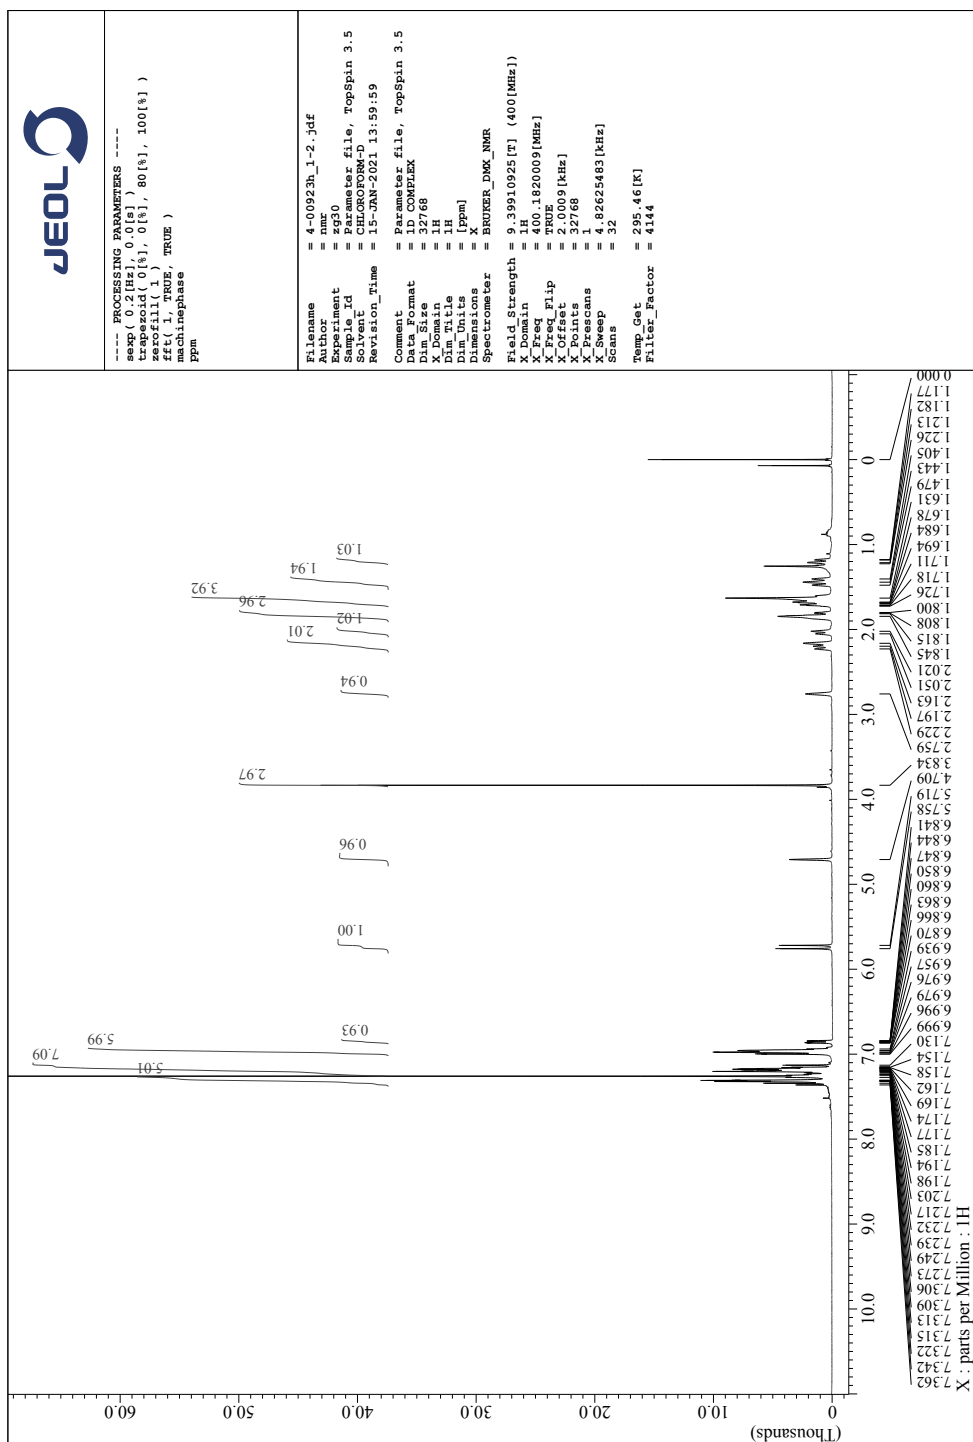



```
----- PROCESSING PARAMETERS -----  
sexp( 0.1[Hz], 0.0[s] )  
trapezoid( 0[%], 0[%], 80[%], 100[%] )  
zerofill( )  
sfb( 1[Hz], TRUE )  
machinephase  
ppm
```

```
Filename = 4-00923c_1-2.jdf  
Author = nmz  
Experiment = zpgq30  
Sample_Id = Parameter file, TopSpin 3.5  
Solvent = CHLOROFORM-D  
Revision_Time = 15-Jan-2011 14:16:32  
Comment = Parameter file, TopSpin 3.5  
Date_Format = ID_COMPLEX  
Data_Size = 15.68  
X_Domain = 13C  
Dim_Title = 13C  
Dim_Units = [ppm]  
Dimensions = X  
Spectrometer = BRUKER_DMG_NMR  
Field_Strength = 9.39910925 [T] (400[MHz])  
X_Domain = 13C  
X_Freq = 100.63640982 [MHz]  
X_P1 = 12.50 [us]  
X_P2 = 12.50 [us]  
X_Offset = 11.068788 [kHz]  
X_Points = 32768  
X_Frescans = 2  
X_Sweep = 24.03846154 [kHz]  
Scans = 236  
Temp_Get = 296.16 [K]  
Filter_Factor = 832
```

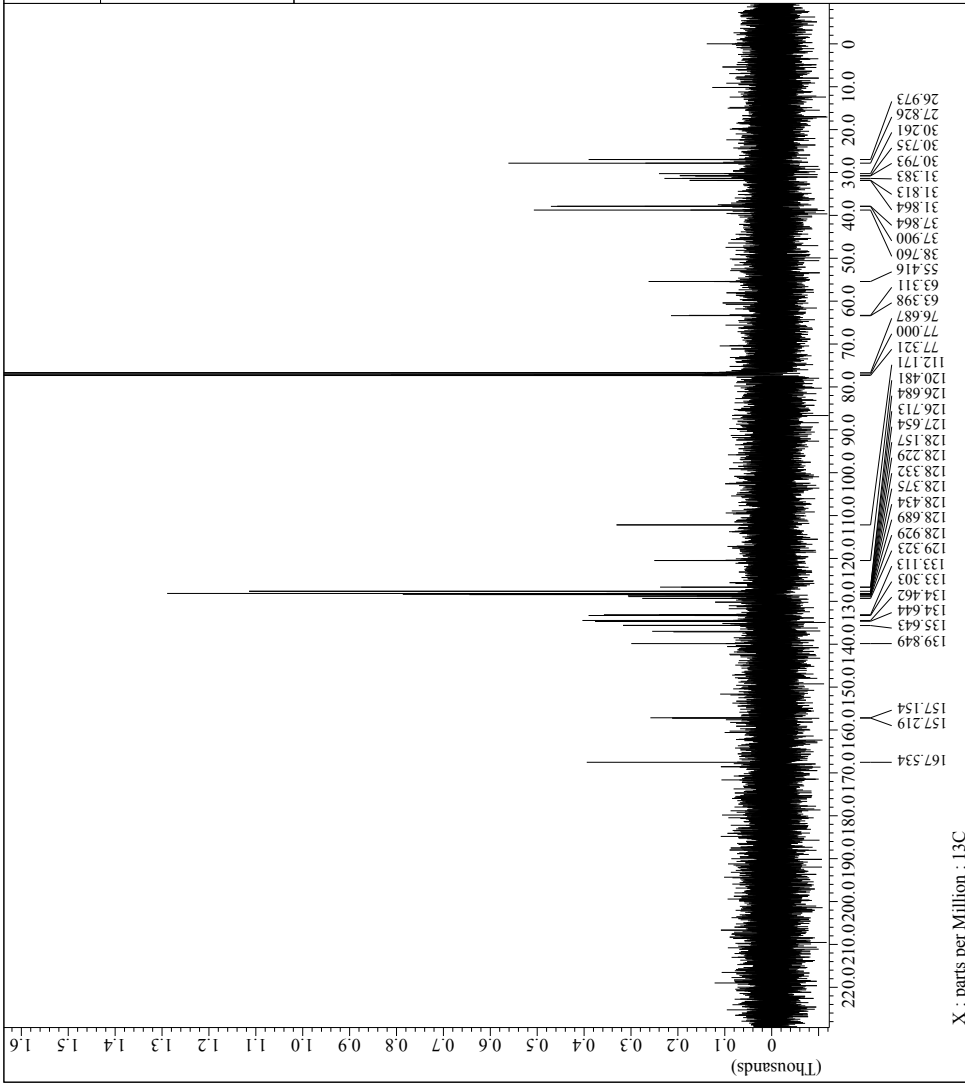



```
----- PROCESSING PARAMETERS -----  
sexp( 2.0[Hz], 0.0[s] )  
trapezoid( 0[%], 0[%], 80[%], 100[%] )  
zerofill( )  
sfb( 0, TRUE, TRUE )  
machinephase  
ppm
```

```
Filename = 4-0923p_1-2.jdf  
Author = nmc  
Experiment = zpgj30  
Parameter file, TopSpin 3.5  
Sample_Id = CHURCOB-D-  
Solvent = 15-0HR-201 14:22:58  
Revision_Time  
Comment = Parameter file, TopSpin 3.5  
Date_Format = ID_COMPLEX  
Data_Size = 31768  
X_Domain = 31P  
Dim_Title = 31P  
Dim_Units = [ppm]  
Dimensions = X  
Spectrometer = BRUKER_DMG_NMR  
Field Strength = 9.39910925 [T] (400[MHz])  
X_Domain = 31P  
X_Freq = 161.995835 [MHz]  
X_P1 = 0.0 [Hz]  
X_Offset = 0 [Hz]  
X_Points = 32768  
X_Frescans = 1  
X_Sweep = 51.02040816 [kHz]  
Scans = 8  
Temp_Get = 295.56 [K]  
Filter_Factor = 392
```

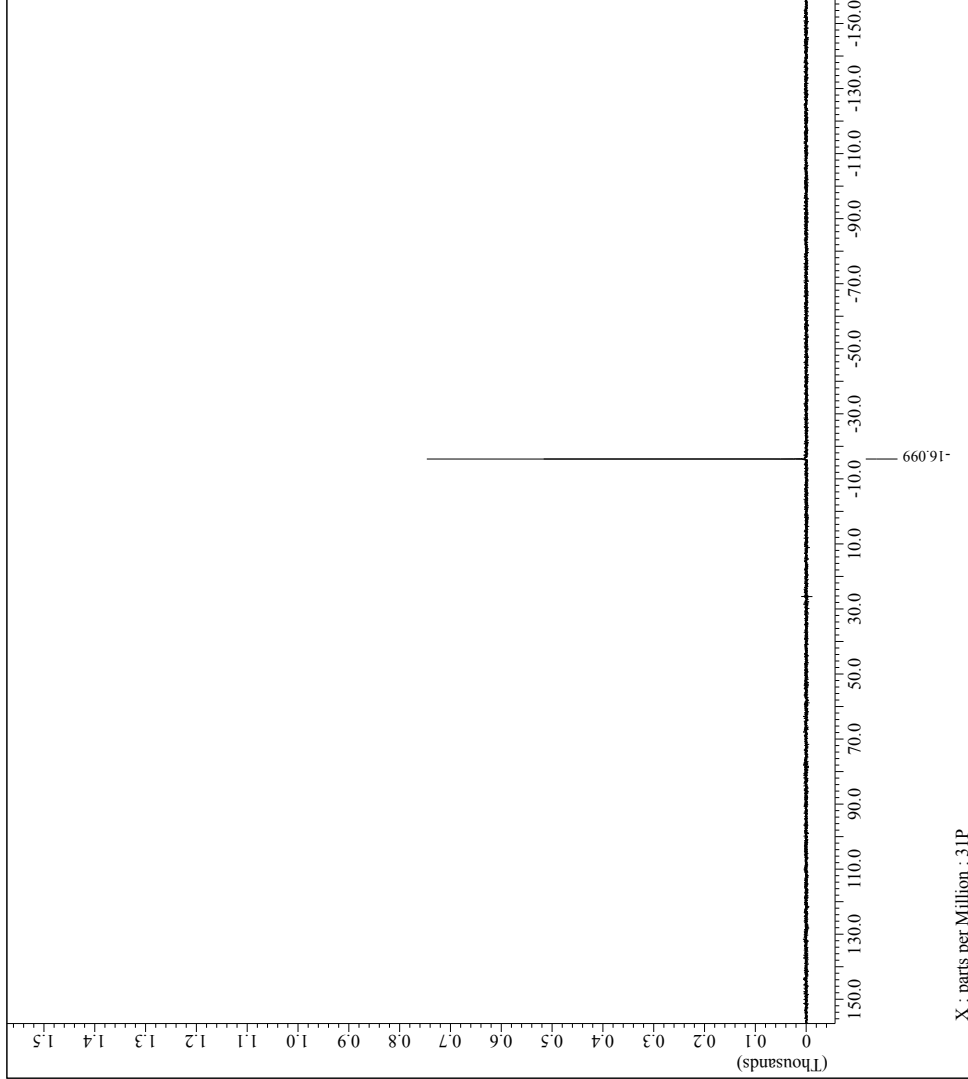

# クロマトグラム

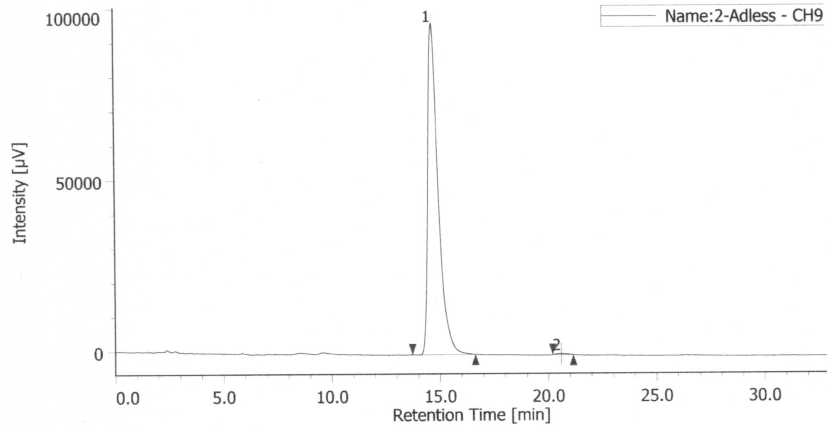

**クロマトグラム情報**  
 ユーザー名 3385  
 更新日時 2021/01/18 20:58:38  
 コメント IA,1.5ml/min,Hex:2-Pro=98.2  
 HPLC システム名 HPLC-2  
 測定日 2021/01/18 18:02:59  
 注入量 1.00 [μL]  
 サンプル# 1  
 プロジェクト名 2019system2  
 取込時間 180.0 [min]  
 測定シーケンス 2,466460 koki  
 コントロールメソッド system2\_2019  
 ピークIDテーブル  
 検量線テーブル  
 追加情報

**チャンネル情報+ピーク情報**  
 クロマトグラム名 2-Adless-CH9  
 サンプル名  
 チャンネル名 270.0nm  
 サンプリング間隔 200 [msec]  
 波形処理メソッド (マニュアル)

| # | ピーク名    | CH | tR [min] | 面積 [μVsec] | 高さ [μV] | 面積%    | 高さ%    | 定量値 | NTP  | 分離度   | シノドリー係数 | 警告 |
|---|---------|----|----------|------------|---------|--------|--------|-----|------|-------|---------|----|
| 1 | Unknown | 9  | 14.683   | 3228463    | 96616   | 99.692 | 99.690 | N/A | 4913 | 6.278 | 1.551   |    |
| 2 | Unknown | 9  | 20.587   | 9965       | 301     | 0.308  | 0.310  | N/A | 6179 | N/A   | 1.218   |    |

## クロマトグラム

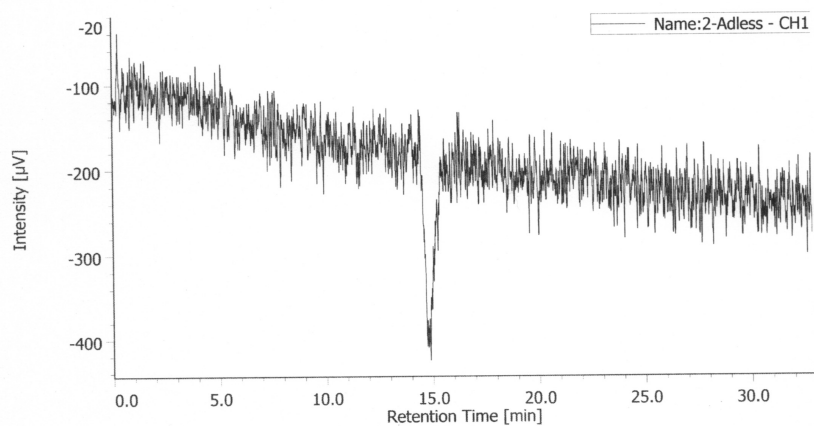

クロマトグラム情報  
ユーザー名 3385  
更新日時 2021/01/18 20:58:38  
コメント IA,1.5ml/min,Hex:2-Pro=98.2  
HPLC システム名 HPLC-2  
測定日 2021/01/18 18:02:59  
注入量 1.00 [μL]  
サンプル# 1  
プロジェクト名 2019system2  
取込時間 180.0 [min]  
測定シーケンス 2.466460 koki  
コントロールメソッド system2\_2019  
ピークIDテーブル  
検量線テーブル  
追加情報

チャンネル情報+ピーク情報  
クロマトグラム名 2-Adless-CH1  
サンプル名  
チャンネル名 CD-2095-CD  
サンプリング間隔 500 [msec]  
波形処理メソッド



<sup>1</sup>H, <sup>13</sup>C and <sup>31</sup>P NMR, and chiral phase HPLC chart of (-)-N-(Adamantan-2-yl)-N-(2-(diphenylphosphaneyl)-6-methoxyphenyl)cinnamamide ((-)-**1b**)

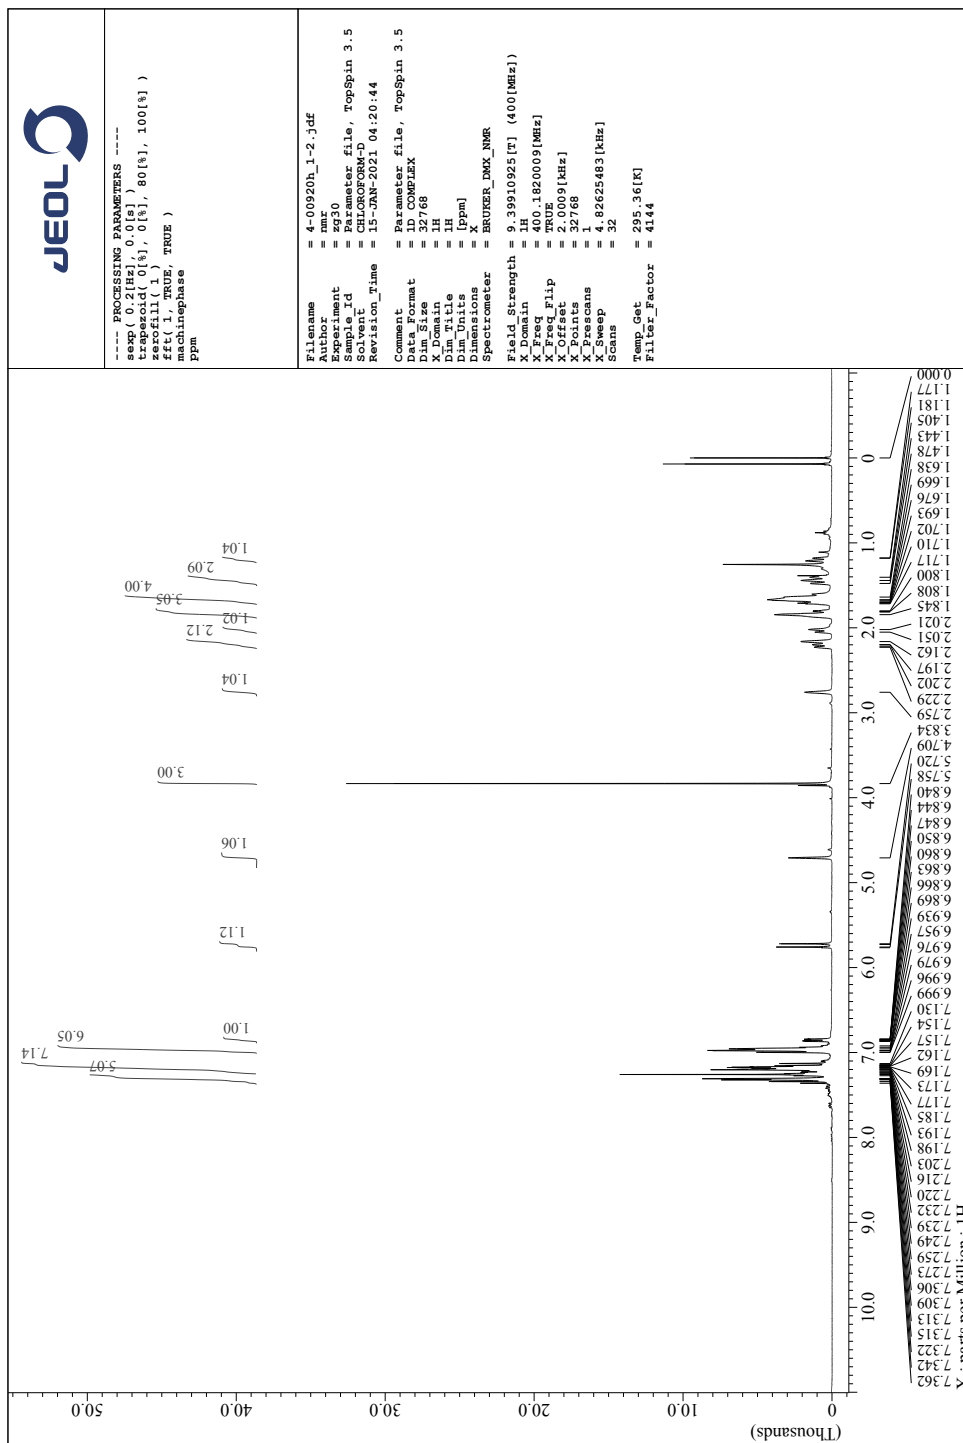



```
----- PROCESSING PARAMETERS -----
sexp( 0.1[Hz], 0.0[s] )
trapezoid( 0[%], 0[%], 80[%], 100[%] )
zerofill( )
gpc( 100, TRUE )
machinephase
ppm
```

```
Filename = 4-00920c_1-3.jdf
Author = nmz
Experiment = zpgj30
Parameter file, TopSpin 3.5
Sample_Id = CHURCH&D-1
Solvent = 15_uhr-201_04.37.28
Revision_Time =
Comment = Parameter file, TopSpin 3.5
Date_Format = ID_COMPLEX
File_Size = 136
X_Domain = 13C
X_Freq = 100.62640982
X_Offset = 11.0687881
X_Phase = 2
X_Points = 32768
X_Prescans = 24.03846154
X_Sweep = 236
Scans =
Temp_Get = 295.76[K]
Filter_Factor = 832
```

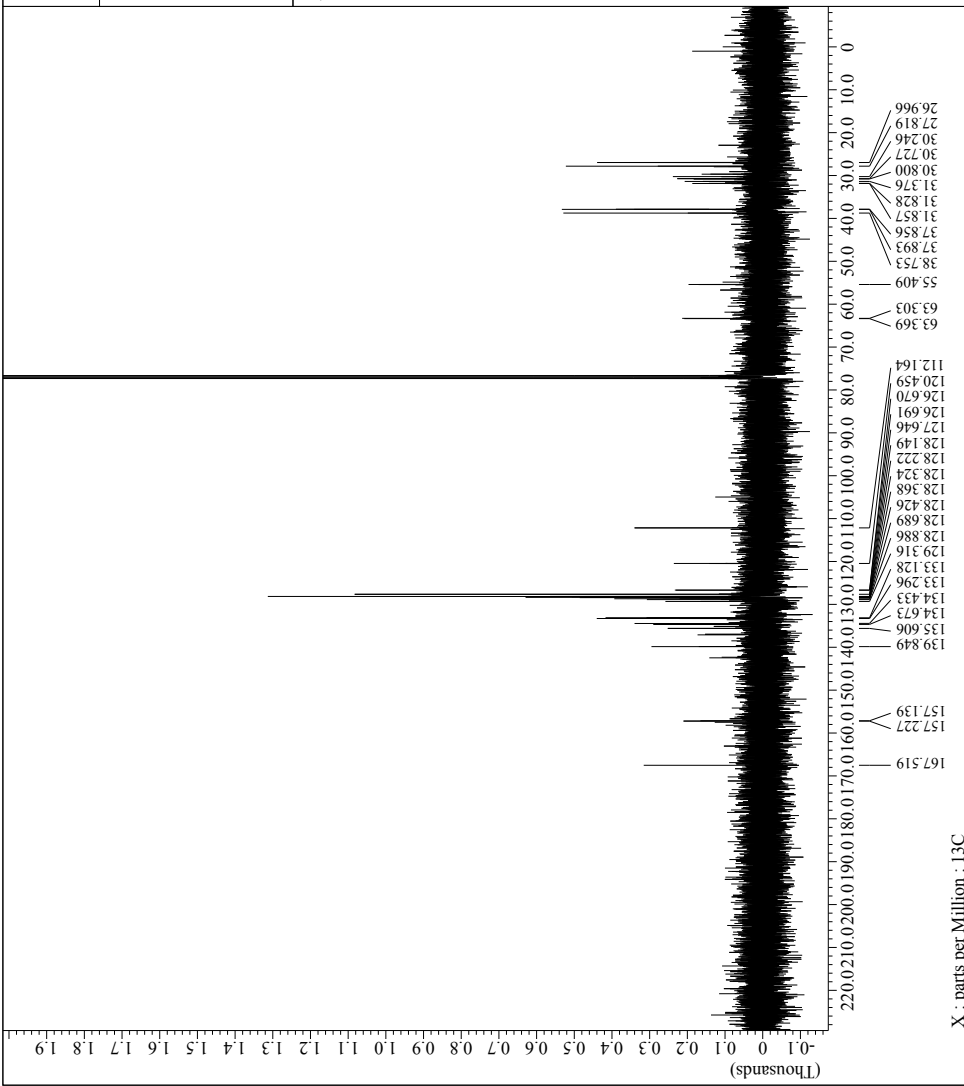

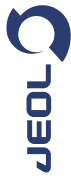

```

---- PROCESSING PARAMETERS ----
sexp( 2.0[Hz], 0.0[s] )
trapezoid( 0[%], 0[%], 80[%], 100[%] )
zerofill( 0 )
sfb( 16[bits], TRUE )
machinephase
ppm

```

```

Filename = 4-00920p_1-2.jdf
Author = nmc
Experiment = zpqj30
Parameter file, TopSpin 3.5
Sample_Id = CHURCOB-D-
Solvent = CHURCOB-D-
Revision_Time = 15-Jan-2001 04:40:25
Comment = Parameter file, TopSpin 3.5
Data_Format = ID_COMPLEX
Data_Size = 31768
X_Domain = 31P
Dim_Title =
Dim_Units = [ppm]
Dimensions = X
Spectrometer = BRUKER_DMG_NMR
Field Strength = 9.39910925[T] (400[Mhz])
X_Domain = 31P
X_Freq = 161.995835[Mhz]
X_P1 = 161.995835[Mhz]
X_Offset = 0[Hz]
X_Points = 32768
X_Frescans = 1
X_Sweep = 51.02040816[Mhz]
Scans = 8
Temp_Get = 295.46[K]
Filter_Factor = 392

```

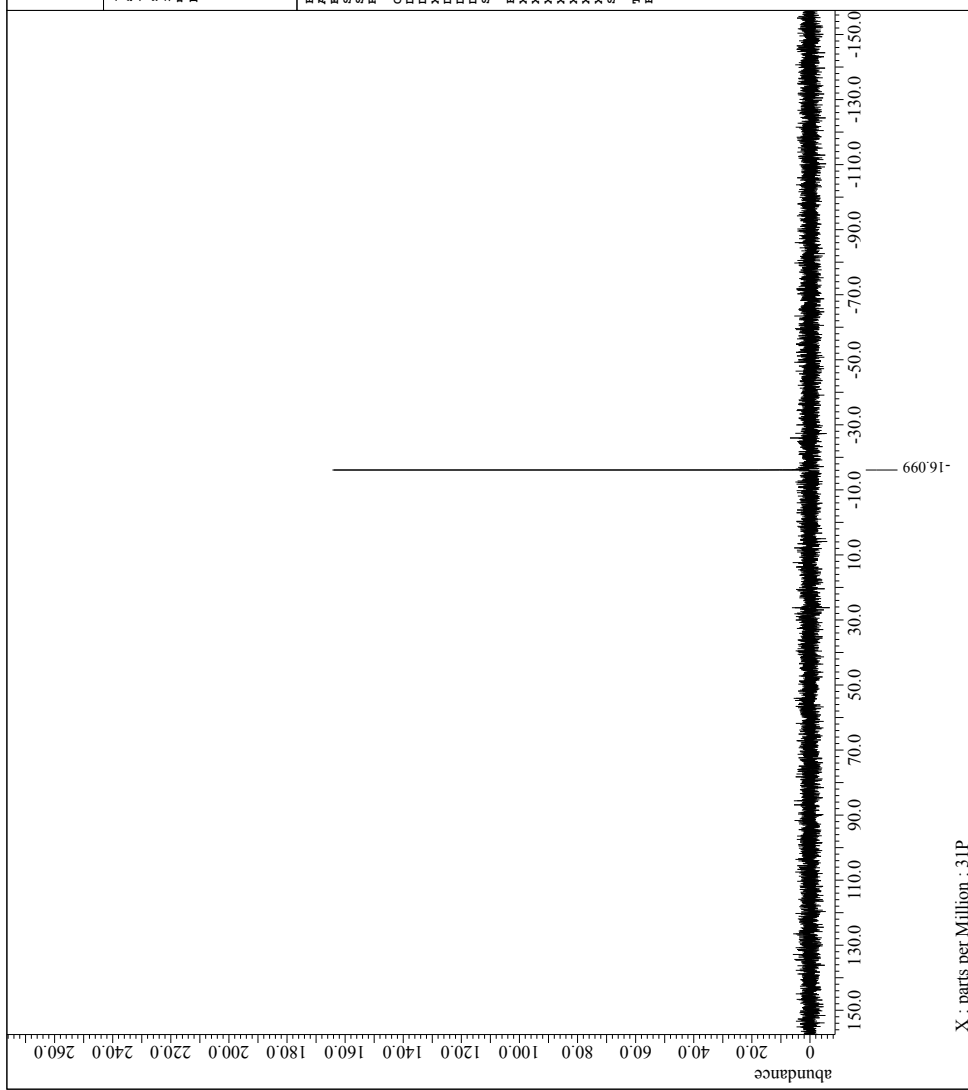

X : parts per Million : 31P

# クロマトグラム

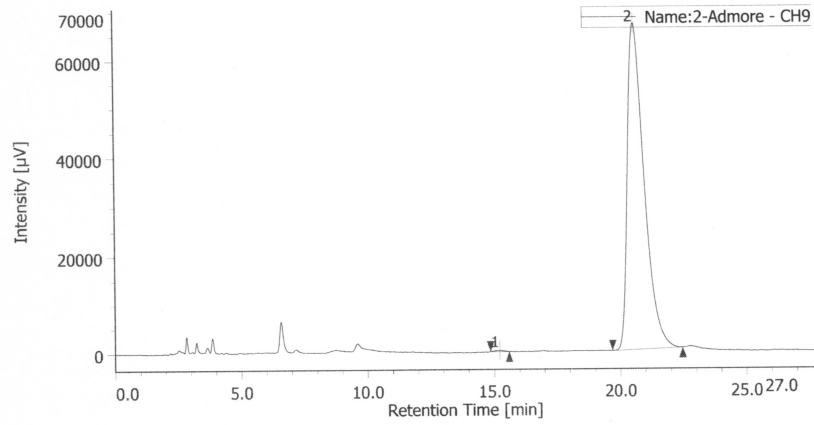

**クロマトグラム情報**  
 ユーザー名 3385  
 更新日時 2021/01/18 20:58:38  
 コメント IA,1.5ml/min,Hex:2-Pro=98:2  
 HPLC システム名 HPLC-2  
 測定日 2021/01/18 19:14:11  
 注入量 1.00 [μL]  
 サンプル# 1  
 プロジェクト名 2019system2  
 取込時間 180.0 [min]  
 測定シーケンス 2.466462 koki  
 コントロールメソッド system2\_2019  
 ピークIDテーブル  
 検量線テーブル  
 追加情報

**チャンネル情報+ピーク情報**  
 クロマトグラム名 2-Admore-CH9  
 サンプル名  
 チャンネル名 270.0nm  
 サンプル間隔 200 [msec]  
 波形処理メソッド (マニュアル)

| # | ピーク名    | CH | TR [min] | 面積 [μVsec] | 高さ [μV] | 面積%    | 高さ%    | 定置値 | NTP  | 分離度   | シフト | 係数 | 警告    |
|---|---------|----|----------|------------|---------|--------|--------|-----|------|-------|-----|----|-------|
| 1 | Unknown | 9  | 15.207   | 5576       | 226     | 0.182  | 0.337  | N/A | 6274 | 5.555 |     |    | 0.997 |
| 2 | Unknown | 9  | 20.600   | 3060459    | 66834   | 99.818 | 99.663 | N/A | 4884 | N/A   |     |    | 1.512 |

# クロマトグラム

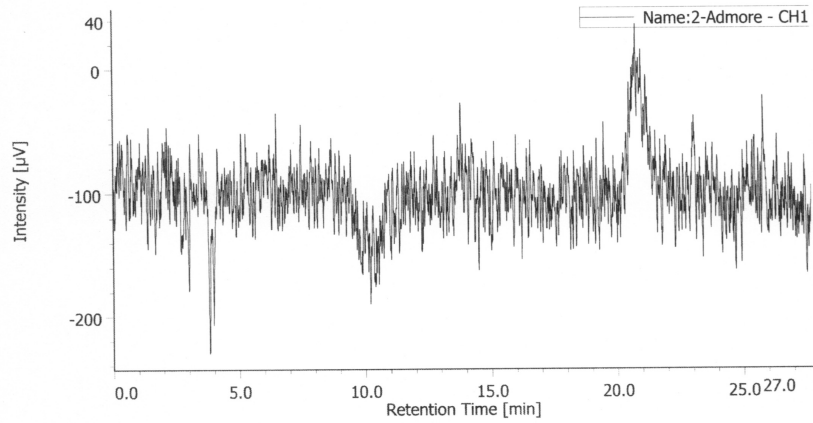

クロマトグラム情報  
ユーザー名 3385  
更新日時 2021/01/18 20:58:38  
コメント IA,1.5ml/min,Hex:2-Pro=98:2  
HPLC システム名 HPLC-2  
測定日 2021/01/18 19:14:11  
注入量 1.00 [μL]  
サンプル# 1  
プロジェクト名 2019system2  
取込時間 180.0 [min]  
測定シーケンス 2\_466462 koki  
コントロールメソッド system2\_2019  
ピークIDテーブル  
検量線テーブル  
追加情報

チャンネル情報+ピーク情報  
クロマトグラム名 2-Admore-CH1  
サンプル名  
チャンネル名 CD-2095-CD  
サンプリング間隔 500 [msec]  
波形処理メソッド

<sup>1</sup>H, <sup>13</sup>C and <sup>31</sup>P NMR, and chiral phase HPLC chart of (aR)-(-)-N-(Cyclohexyl)-N-(2-(diphenylphosphaneyl)-6-methoxyphenyl)cinnamamide ((aR)-(-)-1c)

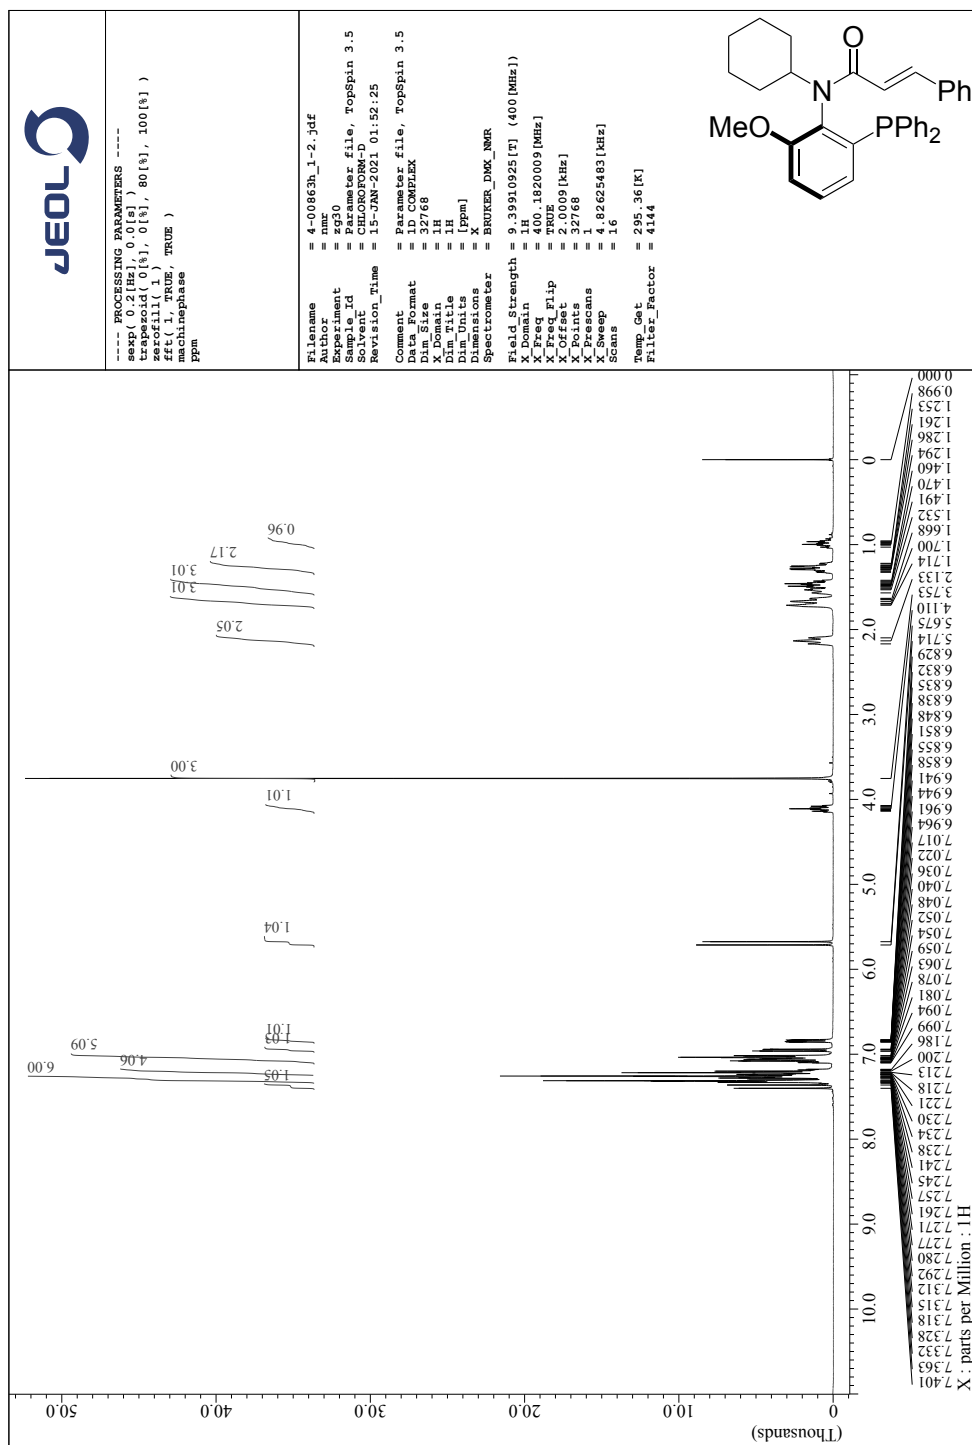



```
----- PROCESSING PARAMETERS -----  
sexp( 0.1[Hz], 0.0[s] )  
trapezoid( 0[%], 0[%], 80[%], 100[%] )  
zerofill( 0 )  
sfb( 0, TRUE, TRUE )  
machinephase  
ppm
```

```
Filename = 4-0863c_1-3.jdf  
Author = nmz  
Experiment = zpgq30  
Sample_Id = Parameter file, TopSpin 3.5  
Solvent = CHLOROFORM-D  
Revision_Time = 15-Jan-2011 02:16:21  
Comment = Parameter file, TopSpin 3.5  
Date_Format = DD.MM.YYYY  
F2_Size = 128.68  
F2_Domain = 13C  
Dim_Title = 13C  
Dim_Units = [ppm]  
Dimensions = X  
Spectrometer = BRUKER_DMG_NMR  
Field_Strength = 9.39910925 [T] (400[MHz])  
X_Domain = 13C  
X_Freq = 100.62640982 [MHz]  
X_Offset = 0.000000 [ppm]  
X_Phase = 0.000000 [deg]  
X_Points = 32768  
X_Frescans = 2  
X_Sweep = 24.03846154 [kHz]  
Scans = 512  
Temp_Get = 296.06 [K]  
Filter_Factor = 832
```

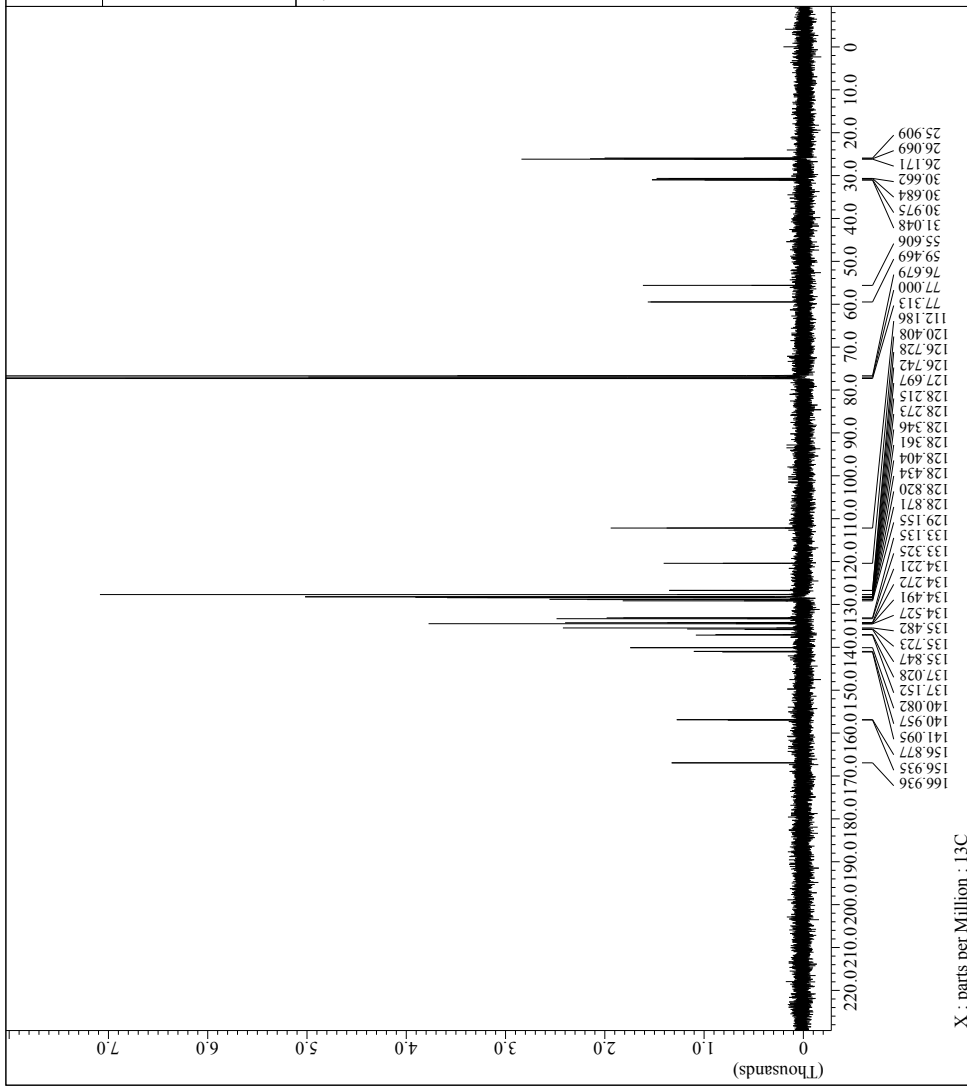

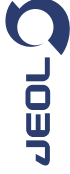

```
--- PROCESSING PARAMETERS ---  
sexp( 2.0[Hz], 0.0[s] )  
trapezoid( 0[%], 0[%], 80[%], 100[%] )  
zerofill( )  
sfb( 0[Hz], TRUE )  
machinephase
```

```
Filename = 4-0863p_1-2.jdf  
Author = nmr  
Experiment = zpgq30  
Parameter file, TopSpin 3.5  
Sample_Id = CHURCHORD-  
Revision_Time = 15_Oct-2011_02:18:21  
Comment = Parameter file, TopSpin 3.5  
Data_Format = 1D_COMPLEX  
Data_Size = 32768  
X_Domain = 31P  
Dim_Title = [ppm]  
Dimensions = X  
Spectrometer = BRUKER_DMG_NMR  
Field_Strength = 9.39910925[T] (400[MHz])  
X_Domain = 31P  
X_Freq = 161.995833[MHz]  
X_Offset = 0[Hz]  
X_Points = 32768  
X_Frescans = 1  
X_Sweep = 51.02040816[MHz]  
Scans = 8  
Temp_Get = 295.46[K]  
Filter_Factor = 392
```

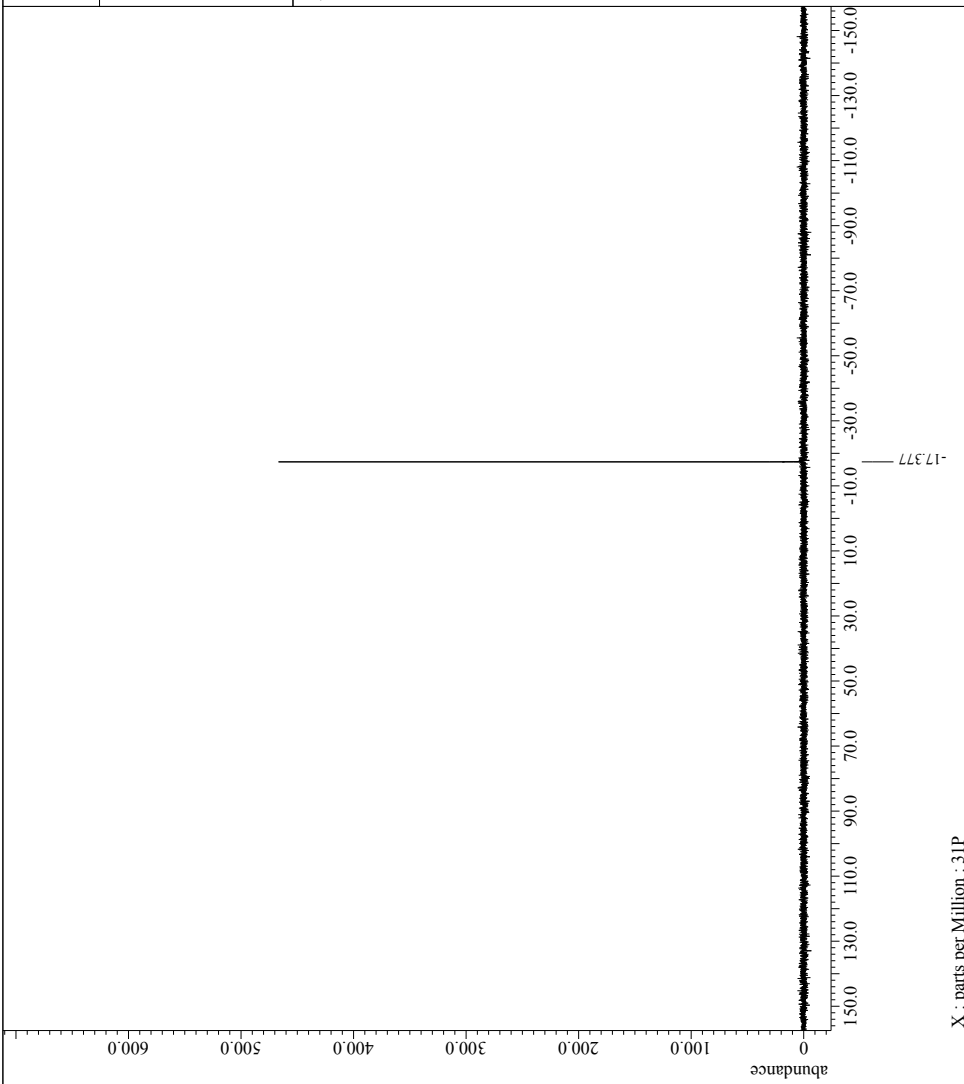



# クロマトグラム

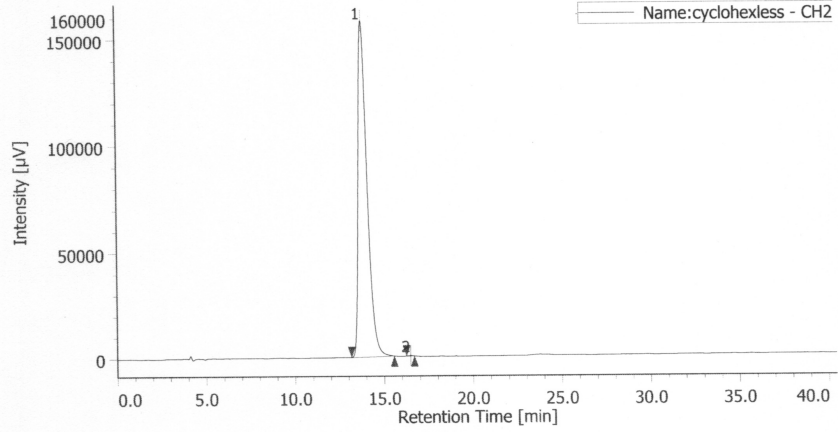

## クロマトグラム情報

ユーザー名 3385  
 更新日時 2021/01/18 16:16:16  
 コメント OD-H,0.8ml/min,Hex:2-Pro=98.2  
 HPLC システム名 HPLC-2  
 測定日 2020/10/07 14:58:12  
 注入量 1.00 [μL]  
 サンプル# 1  
 プロジェクト名 2019system2  
 取込時間 180.0 [min]  
 測定シーケンス 2\_466373 koki  
 コントロールメソッド system2\_2019  
 ピークIDテーブル  
 検量線テーブル  
 追加情報

## チャンネル情報+ピーク情報

クロマトグラム名 cyclohexless-CH2  
 サンプル名  
 チャンネル名 CD-2095-UV  
 サンプル間隔 500 [msec]  
 波形処理メソッド (マニュアル)

| # | ピーク名    | CH | tR [min] | 面積 [μV-sec] | 高さ [μV] | 面積%    | 高さ%    | 定量値 | NTP   | 分離度   | シグマ   | 係数 | 警告 |
|---|---------|----|----------|-------------|---------|--------|--------|-----|-------|-------|-------|----|----|
| 1 | Unknown | 2  | 13.842   | 5510842     | 158005  | 99.960 | 99.911 | N/A | 3792  | 3.857 | 1.407 |    |    |
| 2 | Unknown | 2  | 16.467   | 2194        | 140     | 0.040  | 0.089  | N/A | 20004 | N/A   | 0.996 |    |    |

# クロマトグラム

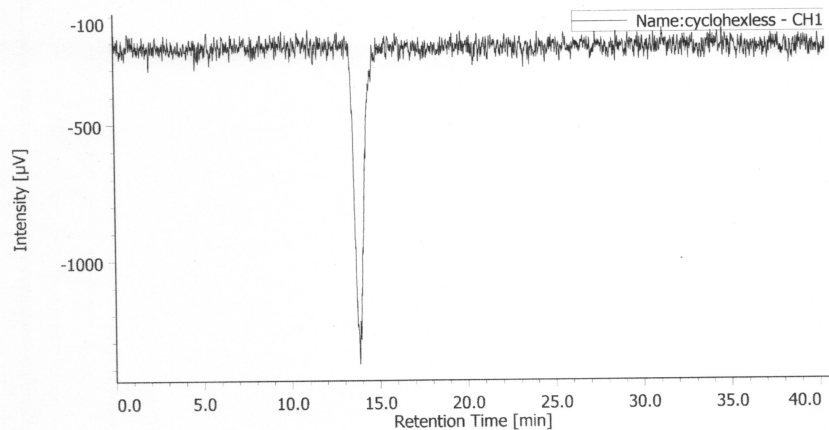

## クロマトグラム情報

|            |                               |
|------------|-------------------------------|
| ユーザー名      | 3385                          |
| 更新日時       | 2021/01/18 16:16:16           |
| コメント       | OD-H,0.8ml/min,Hex:2-Pro=98.2 |
| HPLC システム名 | HPLC-2                        |
| 測定日        | 2020/10/07 14:58:12           |
| 注入量        | 1.00 [μL]                     |
| サンプル#      | 1                             |
| プロジェクト名    | 2019system2                   |
| 取込時間       | 180.0 [min]                   |
| 測定シーケンス    | 2_466373 koki                 |
| コントロールメソッド | system2_2019                  |
| ピークIDテーブル  |                               |
| 検量線テーブル    |                               |
| 追加情報       |                               |

## チャンネル情報+ピーク情報

|          |                  |
|----------|------------------|
| クロマトグラム名 | cyclohexless-CH1 |
| サンプル名    |                  |
| チャンネル名   | CD-2095-CD       |
| サンプリング間隔 | 500 [msec]       |
| 波形処理メソッド |                  |

$^1\text{H}$ ,  $^{13}\text{C}$  and  $^{31}\text{P}$  NMR, and chiral phase HPLC chart of (aS)-(+)-N-(Cyclohexyl)-N-(2-(diphenylphosphanyl)-6-methoxyphenyl)cinnamamide ((aS)-(+)-**1c**)

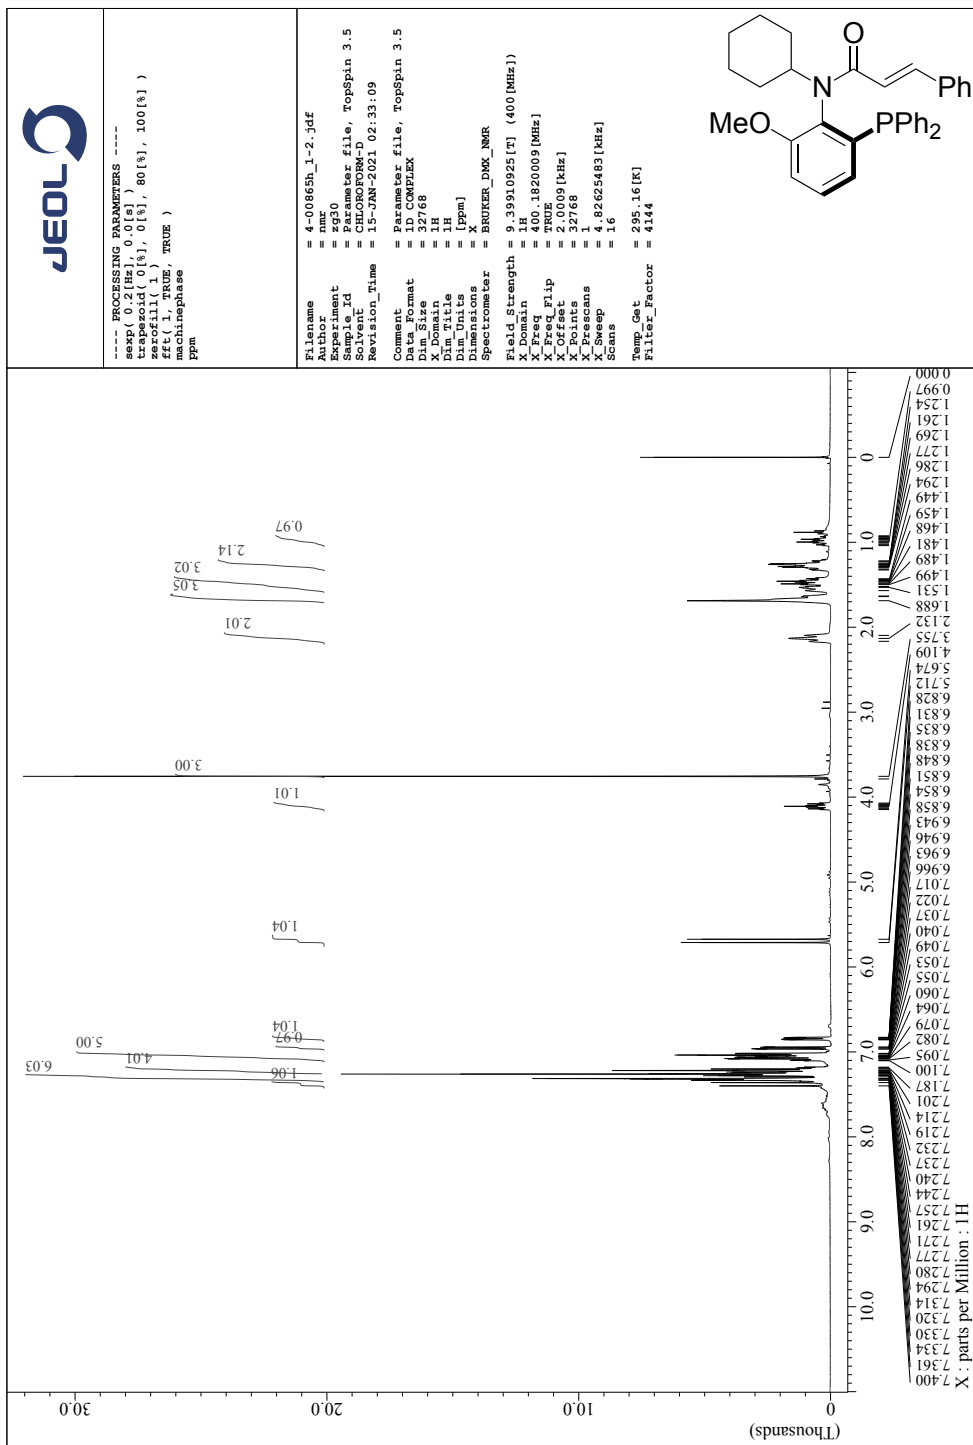



```
----- PROCESSING PARAMETERS -----  
sexp( 0.1[Hz], 0.0[s] )  
trapezoid( 0[%], 0[%], 80[%], 100[%] )  
zerofill( 0 )  
sfb( 0, TRUE, TRUE )  
machinephase  
ppm
```

```
Filename = 4-0865c_1-5.jdf  
Author = nmz  
Experiment = zpgj30  
Parameter file, TopSpin 3.5  
Sample_Id = CHURCHOR-D-  
Revision_Time = 15_Oct-2011_02:47:51  
Comment = Parameter file, TopSpin 3.5  
Date_Format = DD_MM_YY  
Data_Size = 15.86  
X_Dim = 13C  
Dim_Title = 13C  
Dim_Units = [ppm]  
Dimensions = X  
Spectrometer = BRUKER_DMG_NMR  
Field_Strength = 9.39910925 [T] (400[MHz])  
X_Domain = 13C  
X_Freq = 100.63640982 [MHz]  
X_P1 = 12.50 [ppm]  
X_Offset = 11.068788 [kHz]  
X_Points = 32768  
X_Freescans = 2  
X_Sweep = 24.03846154 [kHz]  
Scans = 1024  
Temp_Get = 296.06 [K]  
Filter_Factor = 832
```

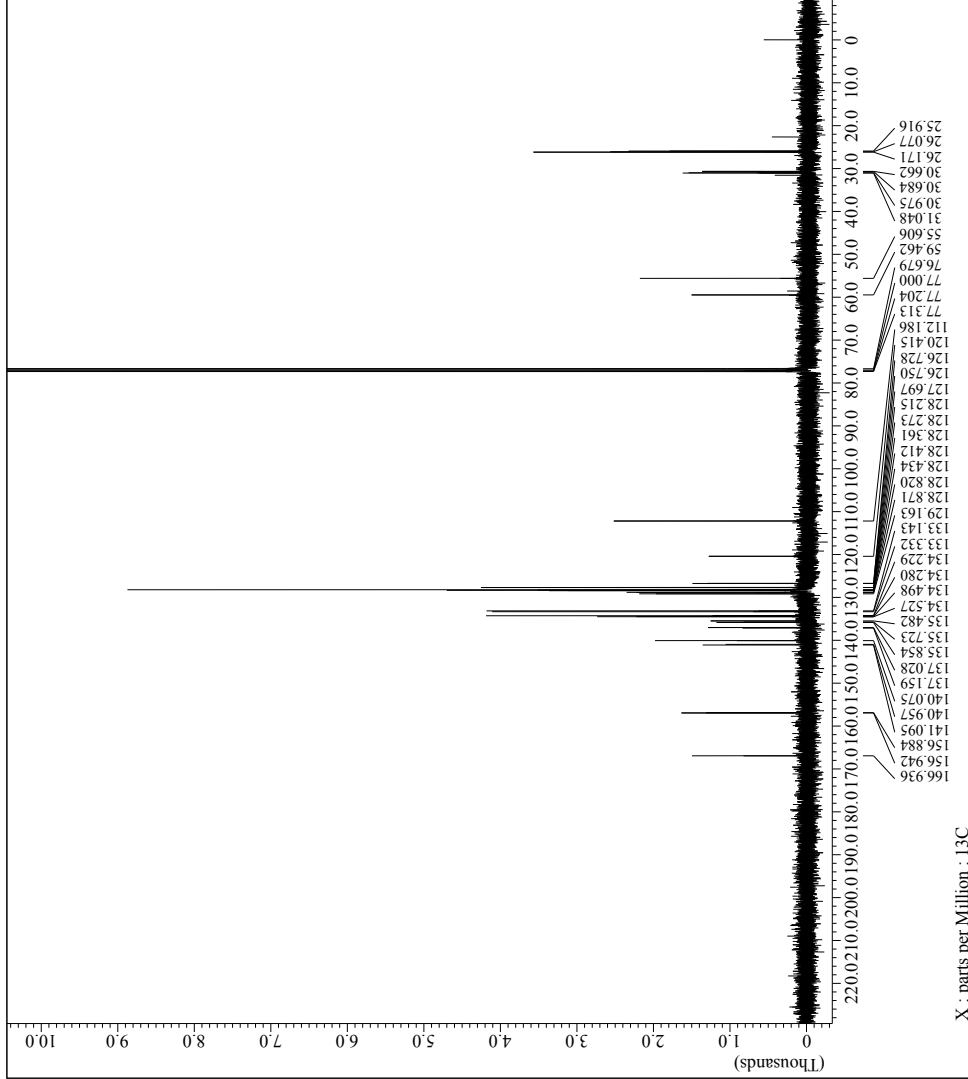



```

--- PROCESSING PARAMETERS ---
sexp( 2.0[Hz], 0.0[s] )
trapezoid( 0[%], 0[%], 80[%], 100[%] )
zerofill( 0 )
machinephase( TRUE )
ppm

```

```

Filename = 4-00945p_1-2.jdf
Author = nmr
Experiment = zpgq30
Sample_Id = Parameter file, TopSpin 3.5
Solvent = CHLOROFORM-D
Revision_Time = 15_Oct-2011_14:32:18
Comment = Parameter file, TopSpin 3.5
Data_Format = 1D_COMPLEX
Data_Size = 32768
X_Domain = 31P
Dim_Title = 31P
Dim_Units = [ppm]
Dimensions = X
Spectrometer = BRUKER_DMG_NMR
Field_Strength = 9.39910925[T] (400[MHz])
X_Domain = 31P
X_Freq = 161.995835[MHz]
X_P1 = 12.00[MHz]
X_Offset = 0[Hz]
X_Points = 32768
X_Frescans = 1
X_Sweep = 51.02040816[MHz]
Scans = 8
Temp_Get = 295.46[K]
Filter_Factor = 392

```

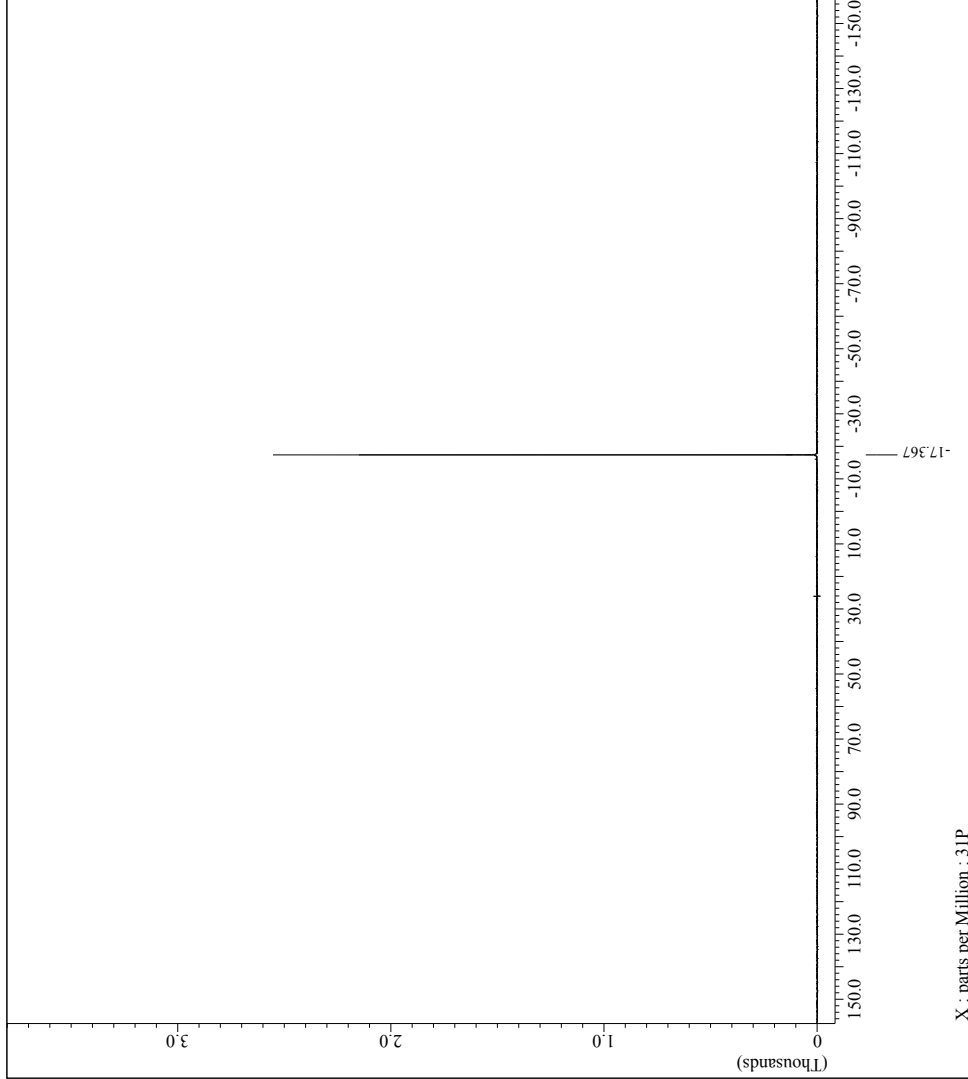

# クロマトグラム

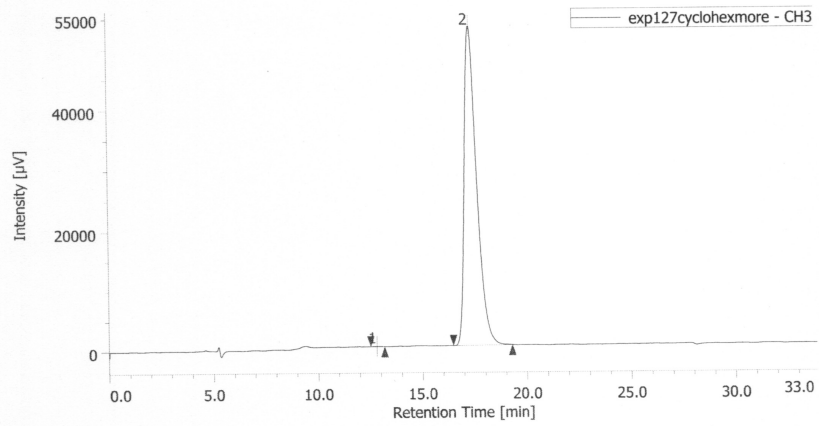

**クロマトグラム情報**  
 ユーザー名 3385  
 更新日時 2020/09/17 16:21:45  
 コメント OD-H, 0.8 mL/min, hex:2-Pro=98.2  
 HPLC システム名 SYSTEM-3  
 測定日 2020/09/17 15:47:49  
 注入量 1.0 [μL]  
 サンプル# 1  
 プロジェクト名 2019system3  
 取込時間 180.0 [min]  
 測定シーケンス 3-649 koki  
 コントロールメソッド 2019system3  
 ピークIDテーブル  
 検量線テーブル  
 追加情報

**チャンネル情報+ピーク情報**  
 クロマトグラム名 exp127cyclohexmore-CH3  
 サンプル名  
 チャンネル名 UV-2075  
 サンプリング間隔 500 [msec]  
 波形処理メソッド (マニュアル)

| # | ピーク名    | CH | tR [min] | 面積 [μV·sec] | 高さ [μV] | 面積%    | 高さ%    | 定量値 | NTP  | 分離度   | シムドリ | 係数    | 警告 |
|---|---------|----|----------|-------------|---------|--------|--------|-----|------|-------|------|-------|----|
| 1 | Unknown | 3  | 12.808   | 828         | 37      | 0.038  | 0.070  | N/A | 4465 | 5.004 |      | 1.130 |    |
| 2 | Unknown | 3  | 17.342   | 2152939     | 52795   | 99.962 | 99.930 | N/A | 4365 | N/A   |      | 1.338 |    |

## クロマトグラム

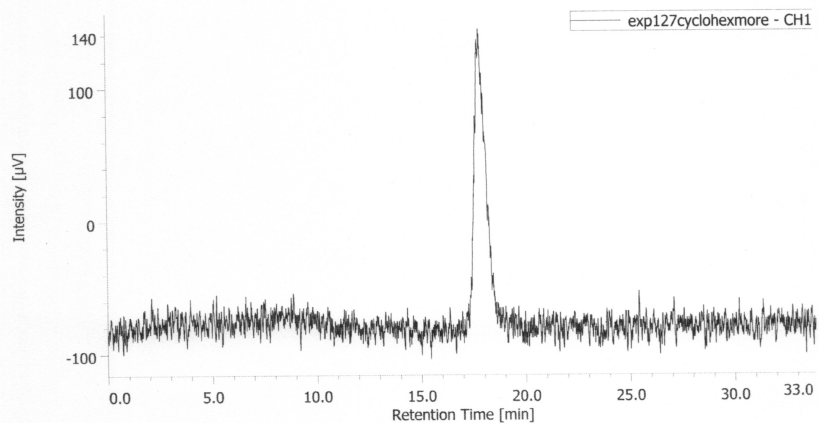

クロマトグラム情報  
ユーザー名 3385  
更新日時 2020/09/17 16:21:45  
コメント OD-H, 0.8 mL/min, hex:2-Pro=98.2  
HPLC システム名 SYSTEM-3  
測定日 2020/09/17 15:47:49  
注入量 1.0 [μL]  
サンプル# 1  
プロジェクト名 2019system3  
取込時間 180.0 [min]  
測定シーケンス 3-649 koki  
コントロールメソッド 2019system3  
ピークIDテーブル  
検量線テーブル  
追加情報

チャンネル情報+ピーク情報  
クロマトグラム名 exp127cyclohexmore-CH1  
サンプル名  
チャンネル名 CD-2095\_CD  
サンプリング間隔 500 [msec]  
波形処理メソッド

<sup>1</sup>H and <sup>13</sup>C NMR, and chiral phase HPLC chart of (*S*)-**4a**

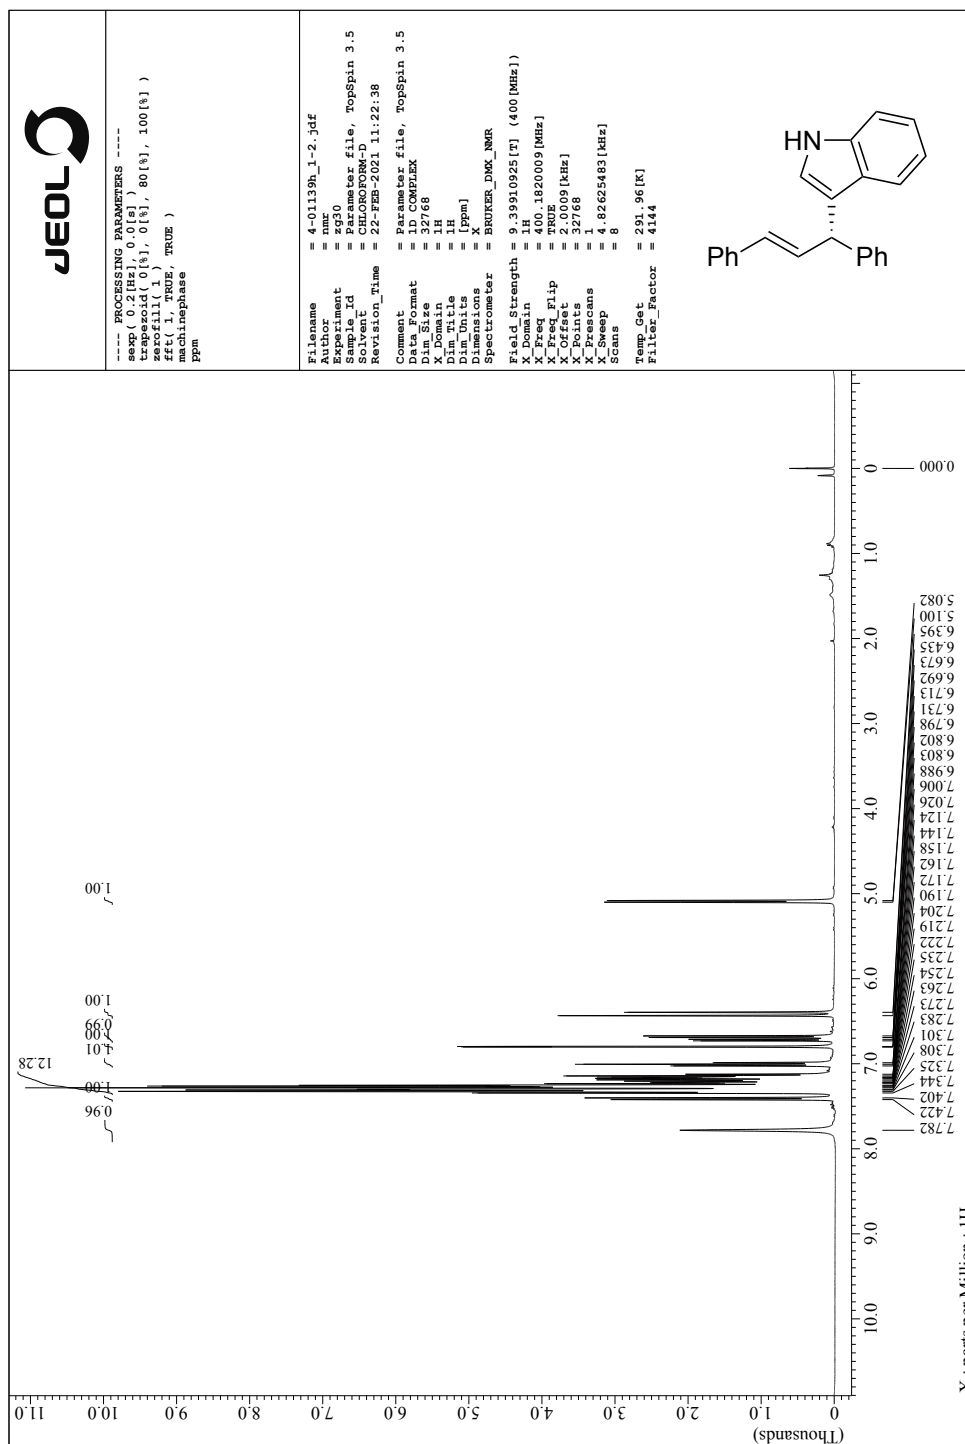



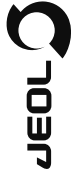

```
----- PROCESSING PARAMETERS -----  
sexp( 0.1[Hz], 0.0[s] )  
trapezoid( 0[%], 0[%], 80[%], 100[%] )  
zerofill( 0 )  
scale( 1.0, TRUE )  
machinephase  
ppm
```

```
Filename = 4-01139c_1-2.jdf  
Author = mxr  
Experiment = zjpx30  
Sample_Id = Parameter file, TopSpin 3.5  
Solvent = CHLOROFORM-D  
Revision_Time = 22-FEB-2021 10:53:14  
Comment = Parameter file, TopSpin 3.5  
Data_Format = ID COMPLEX  
Dim_Size = 12768  
Sweep = 2  
Dim_Title = 13C  
Dim_Units = [ppm]  
Dimensions = X  
Spectrometer = BRUKER_DMX_NMR  
Field_Strength = 9.39910925[T] (400[MHz])  
X_Domain = 13C  
X_Freq = 100.6364982[MHz]  
X_P1_Prog = zgpg30  
X_P1_Flip = 180  
X_Offset = 110668788[kHz]  
X_Points = 32768  
X_Prescans = 2  
X_Sweep = 24.03846154 [kHz]  
Scans = 128  
Temp_Get = 292.66[K]  
Filter_Factor = 832
```

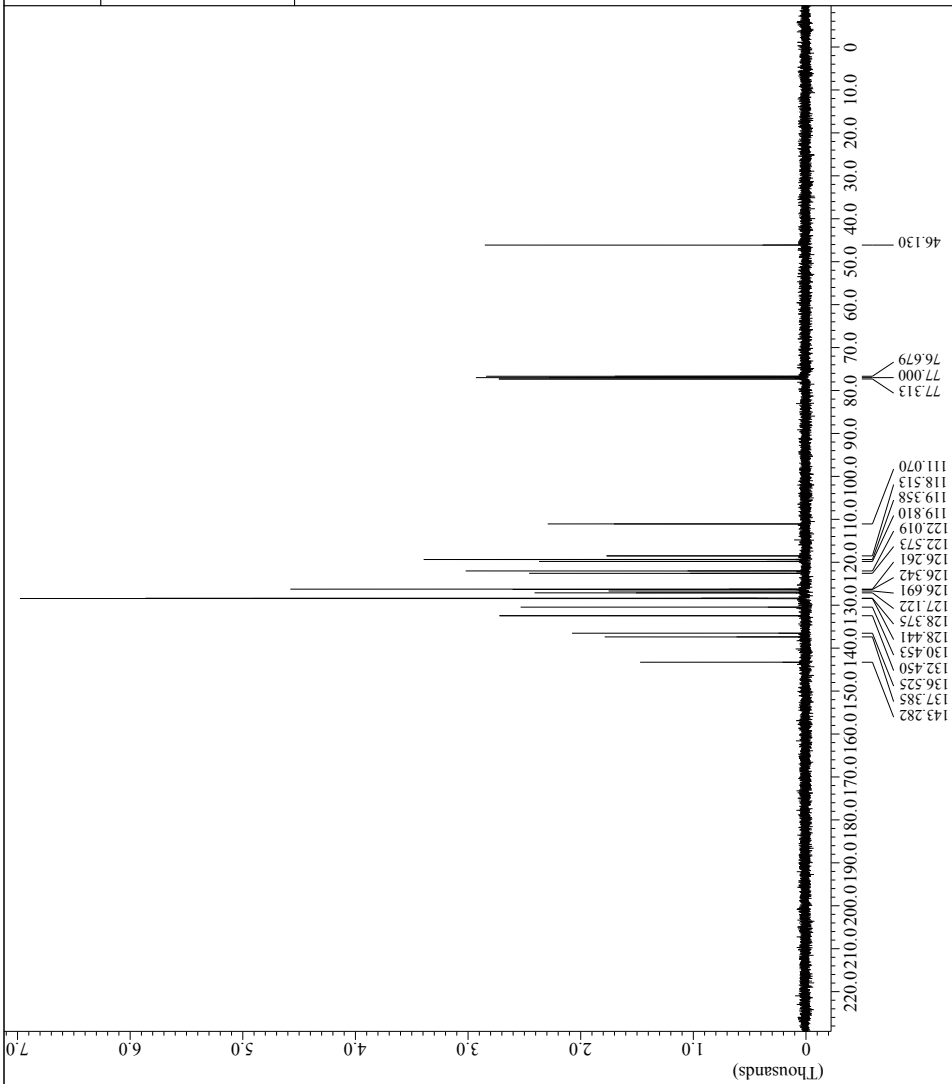

# クロマトグラム

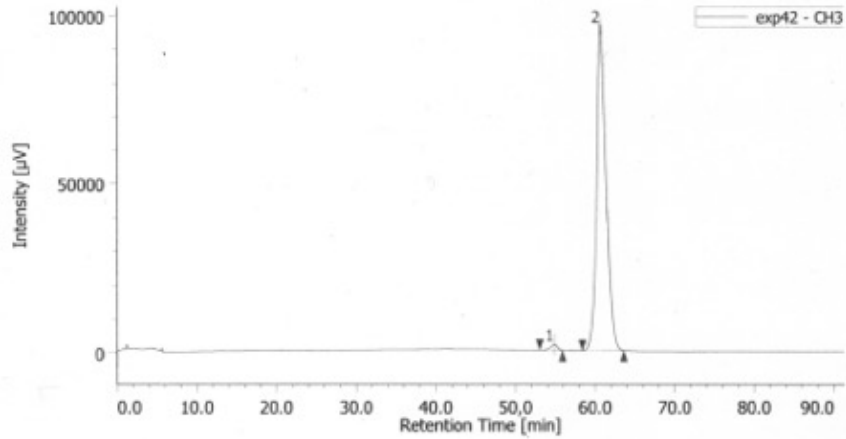

**クロマトグラム情報**  
 ユーザー名 3385  
 更新日時 2021/02/03 20:00:15  
 コメント IB.0.7ml/min,Hex:EtOH=99:1,254nm  
 HPLC システム名 HPLC-1  
 測定日 2021/02/03 18:28:56  
 注入量 1.00 [μL]  
 サンプル# 1  
 プロジェクト名 2019system1  
 取込時間 180.0 [min]  
 測定シーケンス 1,00750 takaya  
 エントロールメソッド 2019system1  
 ピークIDテーブル  
 検量線テーブル  
 追加情報

**チャンネル情報+ピーク情報**  
 クロマトグラム名 exp42-CH3  
 サンプル名  
 チャンネル名 UV-2075  
 サンプリング間隔 500 [msec]  
 波形処理メソッド (マニュアル)

| # | ピーク名    | CH | TR [min] | 面積 [μVsec] | 高さ [μV] | 面積%    | 高さ%    | 定置値 | NTP   | 分離度   | シフトリー係数 | 警告 |
|---|---------|----|----------|------------|---------|--------|--------|-----|-------|-------|---------|----|
| 1 | Unknown | 3  | 54.867   | 111136     | 1719    | 1.379  | 1.744  | N/A | 17822 | 3.185 | 0.820   |    |
| 2 | Unknown | 3  | 60.708   | 7950262    | 96837   | 98.621 | 98.256 | N/A | 14256 | N/A   | 1.192   |    |

# Chiral phase HPLC chart of (±)-4a

## クロマトグラム

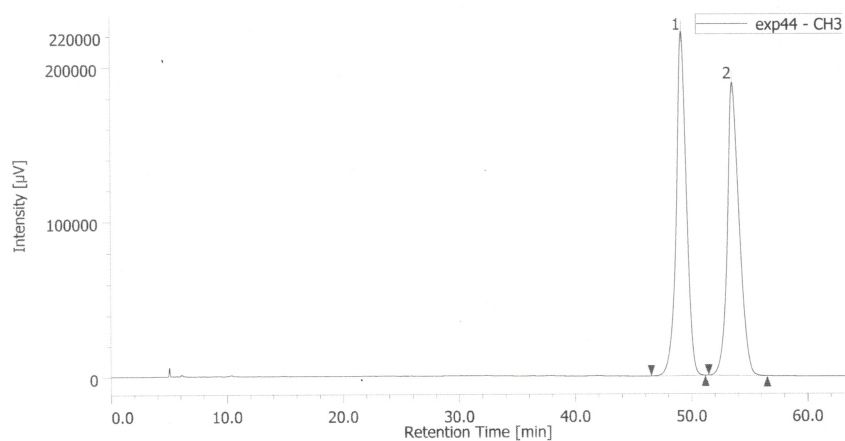

クロマトグラム情報  
 ユーザー名 3385  
 更新日時 2019/01/11 17:59:19  
 コメント IB, 0.7 mL/min, Hex:EtOH=99:1, UV 254 nm, CD 254 nm  
 HPLC システム名 HPLC-1  
 測定日 2019/01/11 16:09:57  
 注入量 1.00 [μL]  
 サンプル# 1  
 プロジェクト名 2017system1  
 取込時間 180.0 [min]  
 測定シーケンス 1.5765 koki  
 コントロールメソッド system1\_2017  
 ピークIDテーブル  
 検量線テーブル  
 追加情報

チャンネル情報+ピーク情報  
 クロマトグラム名 exp44-CH3  
 サンプル名  
 チャンネル名 UV-2075  
 サンプル間隔 500 [msec]  
 波形処理メソッド (マニュアル)

| # | ピーク名    | CH | tR [min] | 面積 [μV·sec] | 高さ [μV] | 面積%  | 高さ%  |
|---|---------|----|----------|-------------|---------|------|------|
| 1 | Unknown | 3  | 49.183   | 13438067    | 221778  | 50.1 | 54.0 |
| 2 | Unknown | 3  | 53.542   | 13381284    | 188978  | 49.9 | 46.0 |

<sup>1</sup>H and <sup>13</sup>C NMR, and chiral phase HPLC chart of (*S*)-**4b**

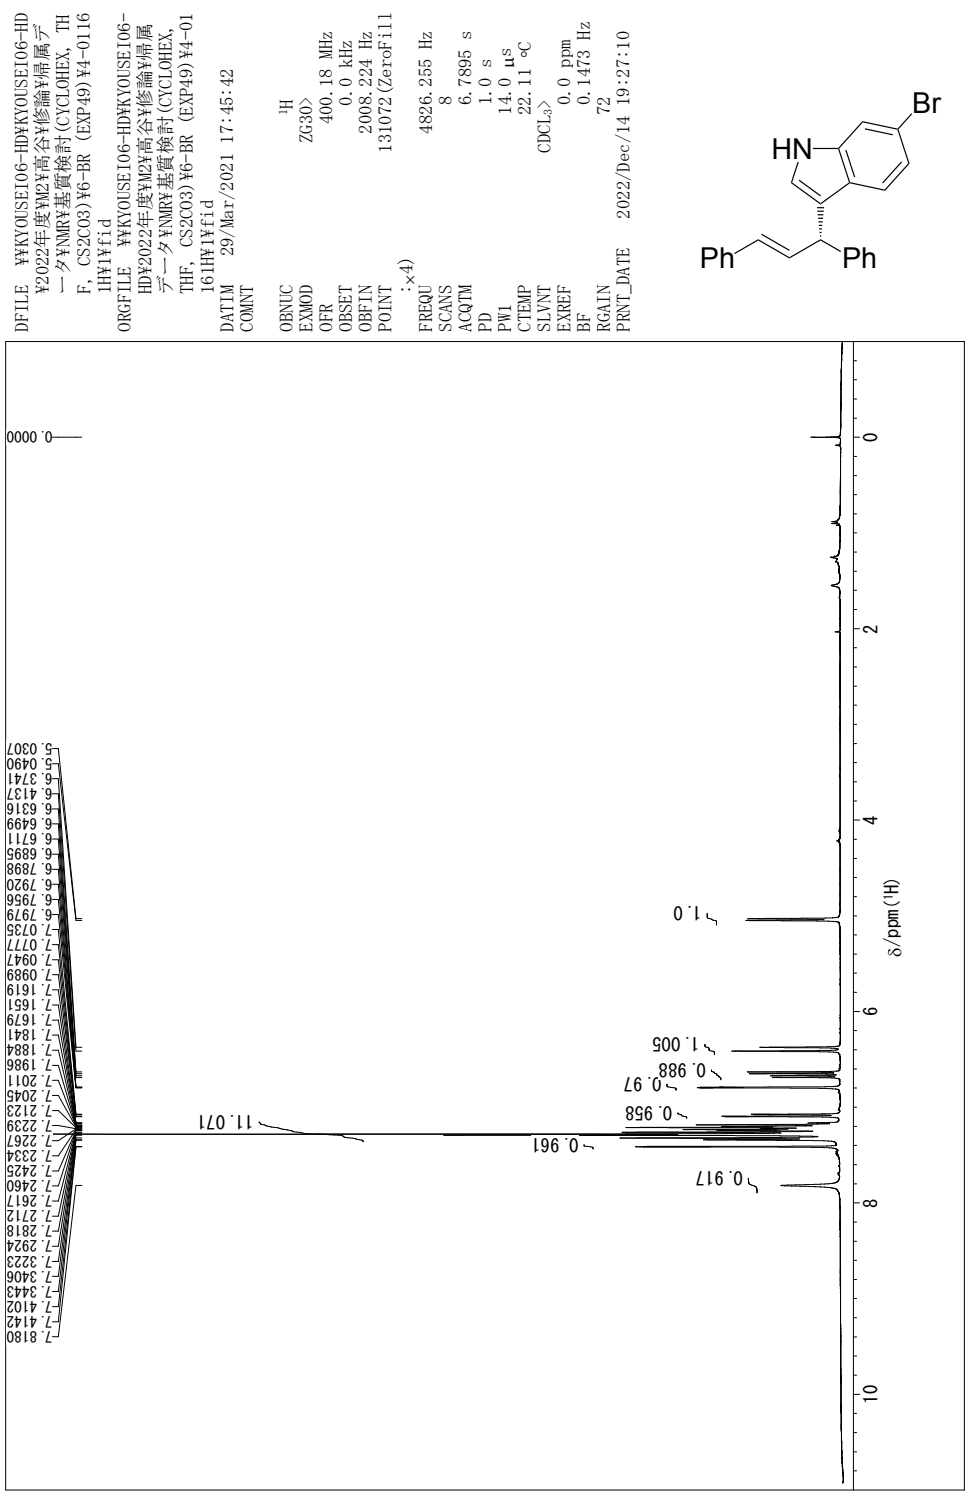

DFILF YYKYOUSEI06-HDKYOUSEI06-HD  
 Y2022年度YMZ研高谷修論帰属予  
 一夕NMRY基質検討(CYClOHEX, TH  
 F, CS2C03)Y6-BR (EXP49)Y4-0116  
 1CY1Yfid  
 ORGFILF YYKYOUSEI06-HDKYOUSEI06-  
 HDY2022年度YMZ研高谷修論帰属  
 予一夕NMRY基質検討(CYClOHEX,  
 THF, CS2C03)Y6-BR (EXP49)Y4-01  
 161CY1Yfid  
 DATIM 29/Mar/2021 18:04:31  
 COMNT

<sup>13</sup>C  
 ZGFG30>  
 100.63 MHz  
 0.0 kHz  
 11066.5 Hz  
 131072 (Zerofil1)  
 24038.46 Hz  
 256  
 1.3631 s  
 2.0 s  
 10.0 μs  
 22.81 °C  
 CDCl<sub>3</sub>>  
 77.0 ppm  
 0.7336 Hz  
 203  
 2022/Dec/14 19:33:42

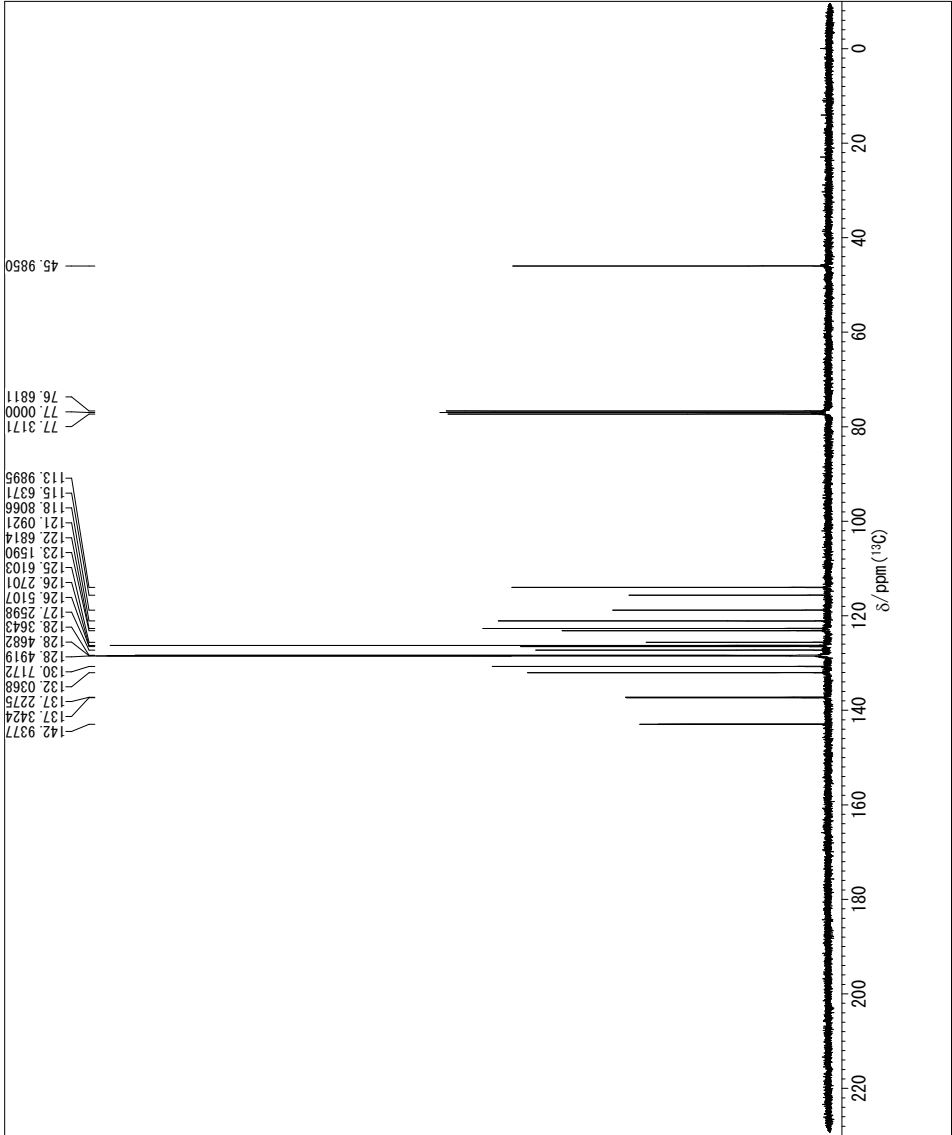

# クロマトグラム

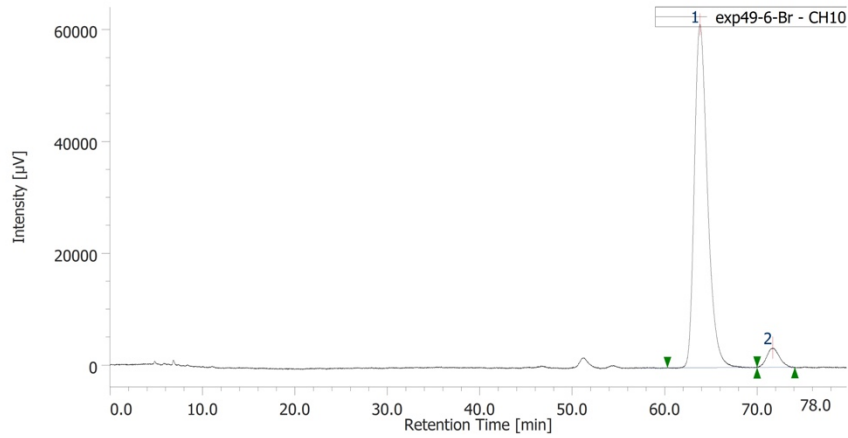

**クロマトグラム情報**  
 ユーザー名 3385  
 更新日時 2023/01/25 15:11:03  
 コメント IA-3, 0.9 mL/min, Hex:2-PrOH=98:2, UV 254 nm, CD 254 nm  
 HPLC システム名 HPLC-1  
 測定日 2023/01/25 13:39:50  
 注入量 1.00 [μL]  
 サンプル# 1  
 プロジェクト名 2022system1  
 取込時間 180.0 [min]  
 測定シーケンス 1-2279 takaya  
 コントロールメソッド system1\_2017  
 ピークIDテーブル  
 検量線テーブル  
 追加情報

**チャンネル情報 + ピーク情報**  
 クロマトグラム名 exp49-6-Br-CH10  
 サンプル名  
 チャンネル名 254.0nm  
 サンプル間隔 100 [msec]  
 波形処理メソッド (マニュアル)

| # | ピーク名    | CH | tR [min] | 面積 [μV·sec] | 高さ [μV] | 面積%  | 高さ%  |
|---|---------|----|----------|-------------|---------|------|------|
| 1 | Unknown | 10 | 63.790   | 6054665     | 61392   | 94.9 | 94.7 |
| 2 | Unknown | 10 | 71.668   | 325998      | 3457    | 5.11 | 5.33 |

Chiral phase HPLC chart of (±)-4b

クロマトグラム

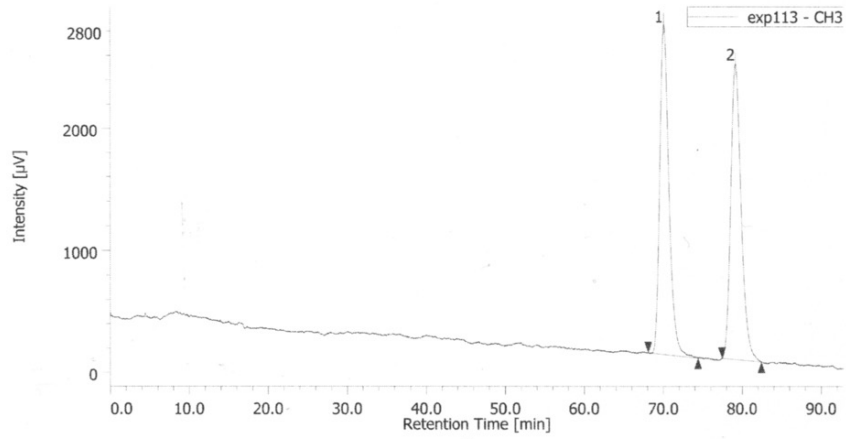

クロマトグラム情報  
 ユーザー名 3385  
 更新日時 2012/05/01 18:08:54  
 コメント IA-3,flow0.9,Hex:2-pro=98.2  
 HPLC システム名 HPLC-1  
 測定日 2012/05/01 16:36:05  
 注入量 1.00 [μL]  
 サンプル# 1  
 プロジェクト名 2012system1  
 取込時間 600.0 [min]  
 測定シーケンス 1\_1338 ishikawa  
 コントロールメソッド 2009system1\_温度制御なし\_600min  
 ピークIDテーブル  
 検量線テーブル  
 追加情報

チャンネル情報+ピーク情報  
 クロマトグラム名 exp113-CH3  
 サンプル名 6-Br(rac)  
 チャンネル名 UV-2075  
 サンプル間隔 500 [msec]  
 波形処理メソッド (マニュアル)

| # | ピーク名    | CH | tR [min] | 面積 [μV·sec] | 高さ [μV] | 面積%    | 高さ%    | 定量値 | NTP   | 分離度   | シメトリ係数 | 警告 |
|---|---------|----|----------|-------------|---------|--------|--------|-----|-------|-------|--------|----|
| 1 | Unknown | 3  | 70.050   | 218281      | 2705    | 49.681 | 52.760 | N/A | 18789 | 4.135 | 1.300  |    |
| 2 | Unknown | 3  | 79.092   | 221087      | 2422    | 50.319 | 47.240 | N/A | 18272 | N/A   | 1.254  |    |

<sup>1</sup>H and <sup>13</sup>C NMR, and chiral phase HPLC chart of (*S*)-**4c**

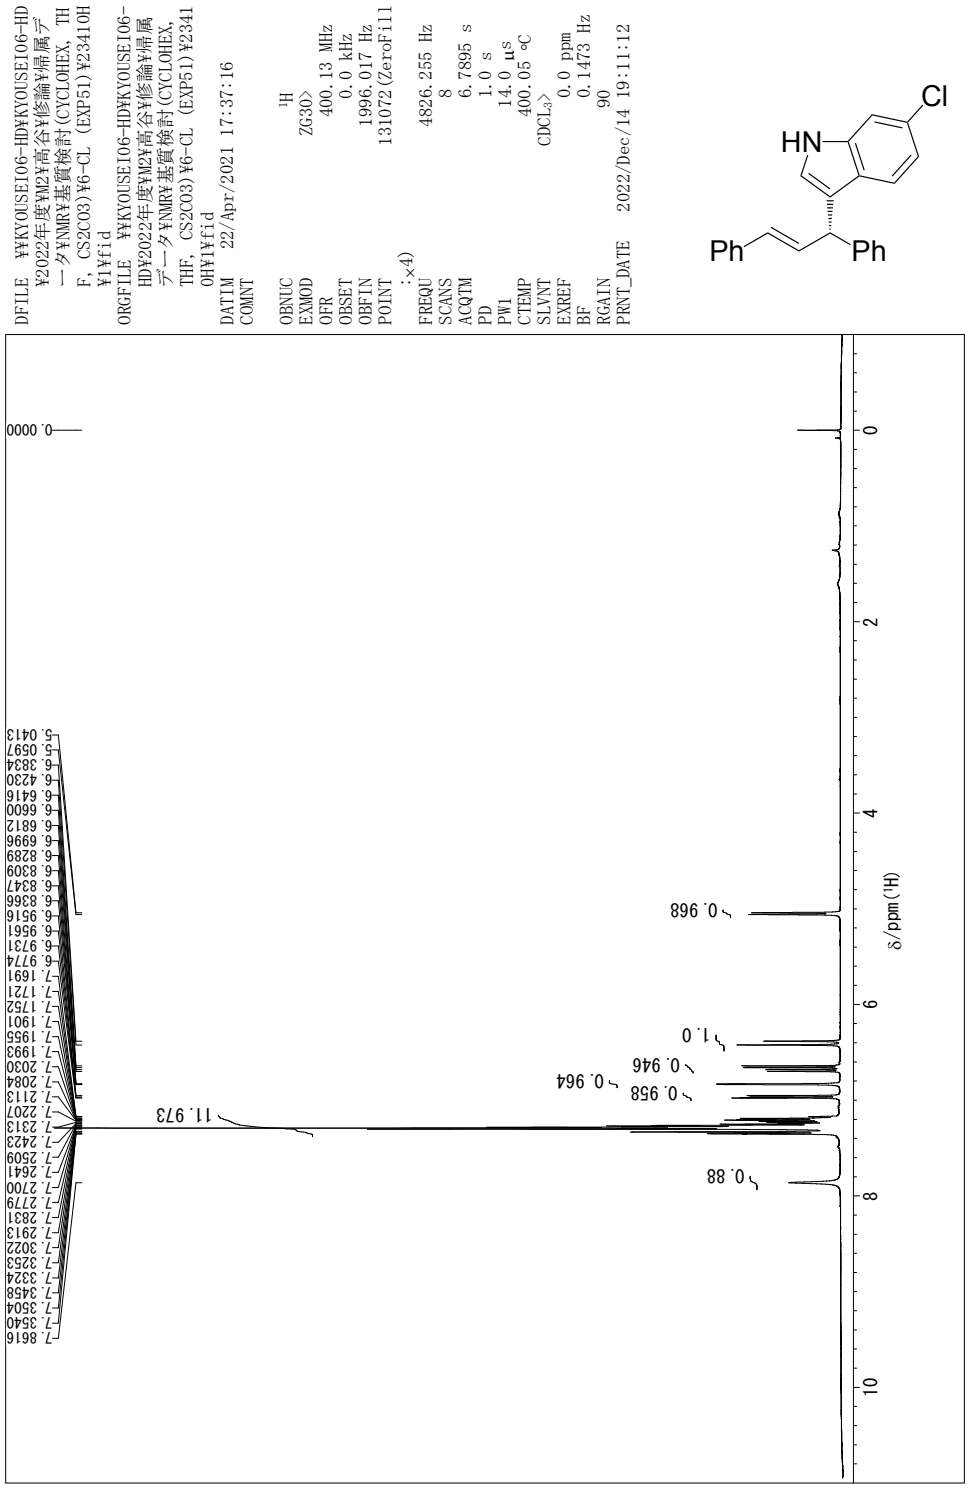



DFILE YKYOUSETI06-HDKYOUSETI06-HD  
 ¥2022年度¥M2¥高谷¥修論¥帰属¥  
 一々¥NMR¥基質¥検討(CYCLOHEX, TH  
 F, CS2C03) ¥6-CL (EXP51) ¥23410C  
 ¥1¥fid  
 ORGFILE YKYOUSETI06-HDKYOUSETI06-  
 HD¥2022年度¥M2¥高谷¥修論¥帰属¥  
 一々¥NMR¥基質¥検討(CYCLOHEX,  
 TH, CS2C03) ¥6-CL (EXP51) ¥2341  
 0C¥1¥fid  
 DATIM 22/Apr/2021 17:53:18  
 COMNT

OBNUC <sup>13</sup>C  
 EXMOD ZGPC30>  
 OFR 100.61 MHz  
 OBSSET 0.0 kHz  
 OBFIN 11067.71 Hz  
 POINT 131072(ZeroFill  
 :x4)  
 FREQU 24038.46 Hz  
 SCANS 256  
 ACQTM 1.3631 s  
 PD 2.0 s  
 PWL 9.0 µs  
 CTEMP 400.05 °C  
 SLVNT CDCl<sub>3</sub>>  
 EXREF 77.0 ppm  
 BF 0.7336 Hz  
 RGAIN 2050  
 PRNT\_DATE 2022/Dec/14 19:17:23

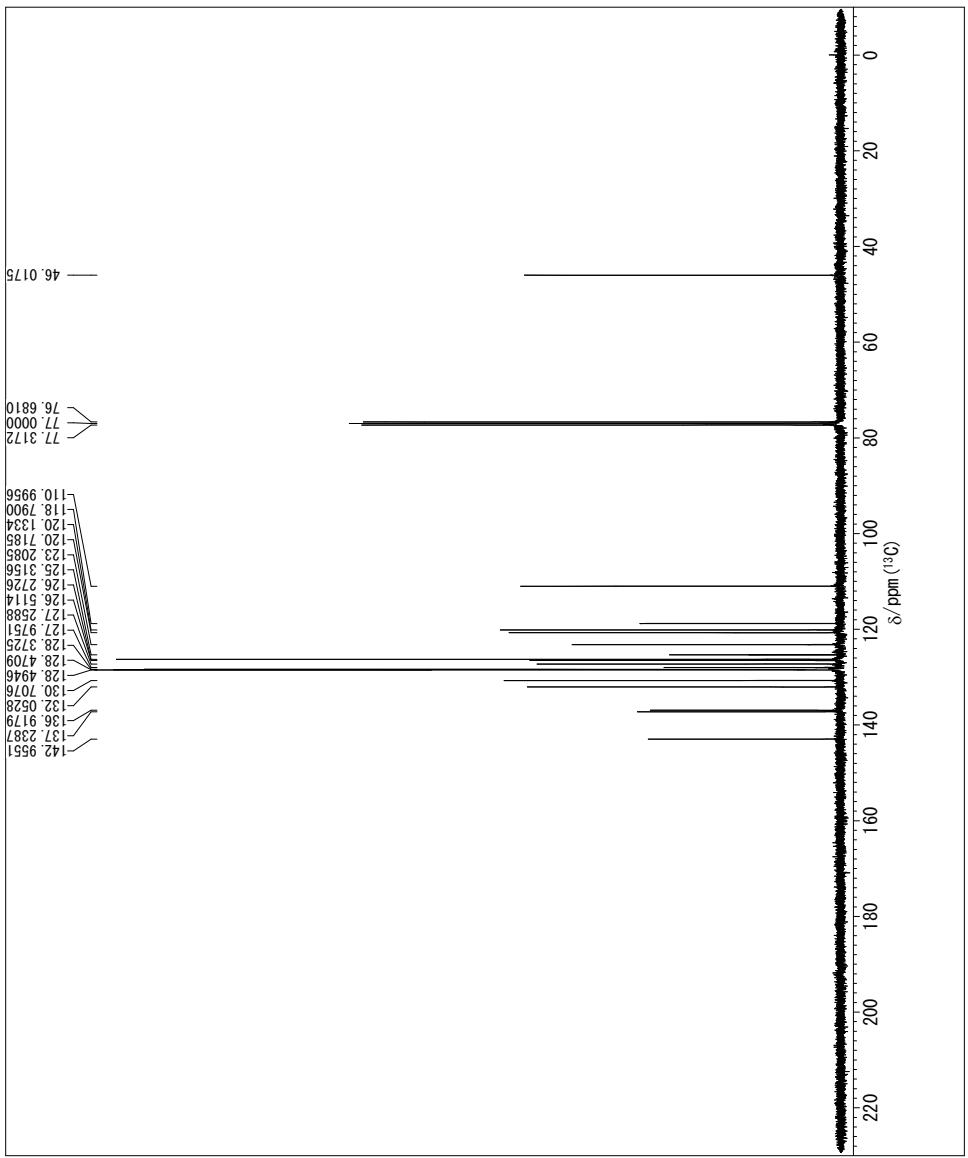

# クロマトグラム

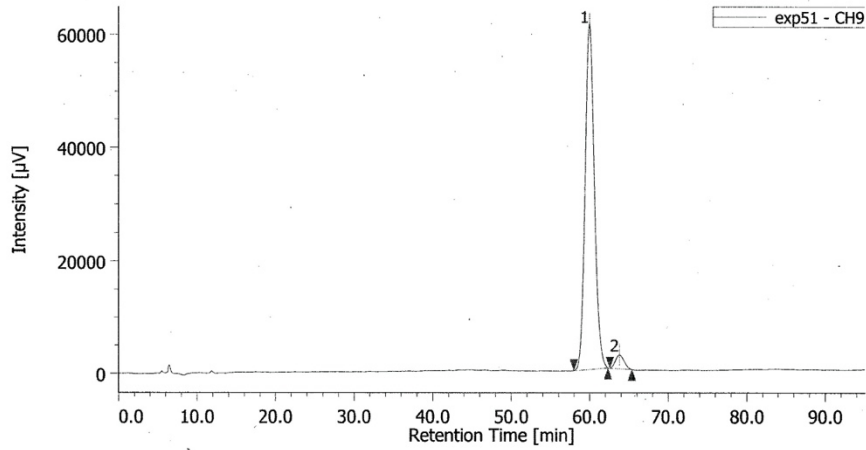

**クロマトグラム情報**  
 ユーザー名 3385  
 更新日時 2021/04/30 15:50:46  
 コメント IA-3,0.7ml/min,Hex:EtOH=99:1,254nm  
 HPLC システム名 HPLC-1  
 測定日 2021/04/30 14:15:43  
 注入量 1.00 [μL]  
 サンプル# 1  
 プロジェクト名 2019system1  
 取込時間 180.0 [min]  
 測定シーケンス 1-00816 takaya  
 コントロールメソッド 2019system1  
 ピークIDテーブル  
 検量線テーブル  
 追加情報

**チャンネル情報+ピーク情報**  
 クロマトグラム名 exp51-CH9  
 サンプル名  
 チャンネル名 254.0nm  
 サンプル間隔 200 [msec]  
 波形処理メソッド (マニュアル)

| # | ピーク名    | CH | tR [min] | 面積 [μV·sec] | 高さ [μV] | 面積%    | 高さ%    | 定量値 | NTP   | 分離度   | シメトリ係数 | 警告 |
|---|---------|----|----------|-------------|---------|--------|--------|-----|-------|-------|--------|----|
| 1 | Unknown | 9  | 59.953   | 5007969     | 61039   | 96.493 | 96.169 | N/A | 12658 | 1.835 | 1.127  |    |
| 2 | Unknown | 9  | 63.773   | 182031      | 2431    | 3.507  | 3.831  | N/A | 15599 | N/A   | 1.100  |    |

Chiral phase HPLC chart of (±)-4c

クロマトグラム

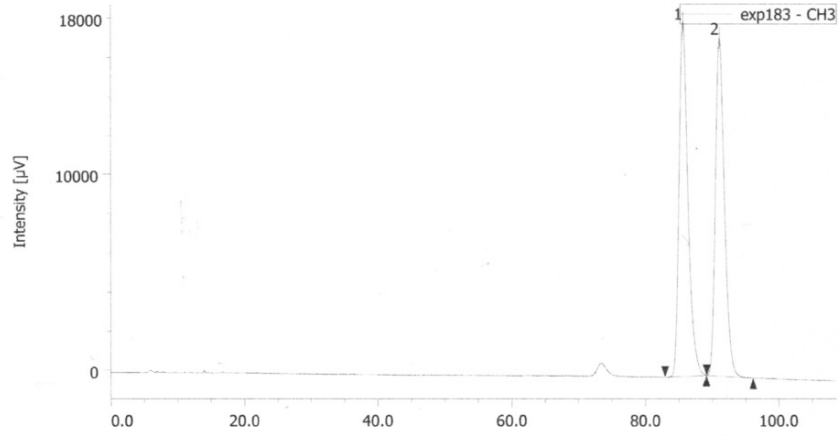

**クロマトグラム情報**  
 ユーザー名 3385  
 更新日時 2012/07/10 17:49:11  
 コメント IA-3,flow0.5,Hex:EtOH=99:1  
 HPLC システム名 HPLC-2  
 測定日 2012/07/10 16:00:35  
 注入量 1.00 [μL]  
 サンプル# 1  
 プロジェクト名 2012system2  
 取込時間 600.0 [min]  
 測定シーケンス 2.1360 ishikawa  
 コントロールメソッド 2009system2\_600min  
 ピークIDテーブル  
 検量線テーブル  
 追加情報

**チャンネル情報+ピーク情報**  
 クロマトグラム名 exp183-CH3  
 サンプル名 6-Cl(rac)  
 チャンネル名 UV-970  
 サンプル間隔 500 [msec]  
 波形処理メソッド (マニュアル)

| # | ピーク名    | CH | LR [min] | 面積 [μVsec] | 高さ [μV] | 面積%    | 高さ%    | 定量値 | NTP   | 分離度   | シメトリ係数 | 警告 |
|---|---------|----|----------|------------|---------|--------|--------|-----|-------|-------|--------|----|
| 1 | Unknown | 3  | 85.625   | 1667051    | 18113   | 50.897 | 51.179 | N/A | 21126 | 2.272 | 1.338  |    |
| 2 | Unknown | 3  | 91.058   | 1627576    | 17278   | 49.103 | 48.821 | N/A | 22304 | N/A   | 1.243  |    |

<sup>1</sup>H and <sup>13</sup>C NMR, and chiral phase HPLC chart of (*S*)-**4d**

DFILE ¥¥KYOUSEI06-HDKYOUSEI06-HD  
 ¥2022年度¥M2¥高谷¥修論¥帰属¥  
 一夕¥NMR¥基質¥検討 (CYCLOHEX, TH  
 F, CS2C03) ¥6-F (EXP59) ¥6-F (4-0  
 1355H). RMI  
 ORGFILE ¥¥KYOUSEI06-HDKYOUSEI06-  
 HD¥2022年度¥M2¥高谷¥修論¥帰属¥  
 デ一夕¥NMR¥基質¥検討 (CYCLOHEX,  
 THF, CS2C03) ¥6-F (EXP59) ¥4-013  
 55H1¥fid  
 DATIM 02/Aug/2021 10:40:03  
 COMNT  
 OBNIC <sup>1</sup>H  
 EXM0D ZG30>  
 OFR 400.18 MHz  
 OBESE 0.0 kHz  
 OBFIN 2008.224 Hz  
 POINT 131072 (ZeroFill  
 :x4)  
 FREQU 4826.255 Hz  
 SCANS 8  
 ACQTM 6.7895 s  
 PD 1.0 s  
 PWI 14.0 µs  
 CTEMP 23.91 °C  
 SLVNT CDCl<sub>3</sub>>  
 EXREF 0.0 ppm  
 BF 0.1473 Hz  
 RGAIN 64  
 PRNT\_DATE 2022/Dec/14 18:46:35

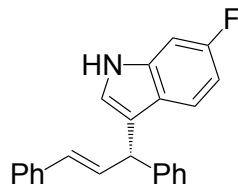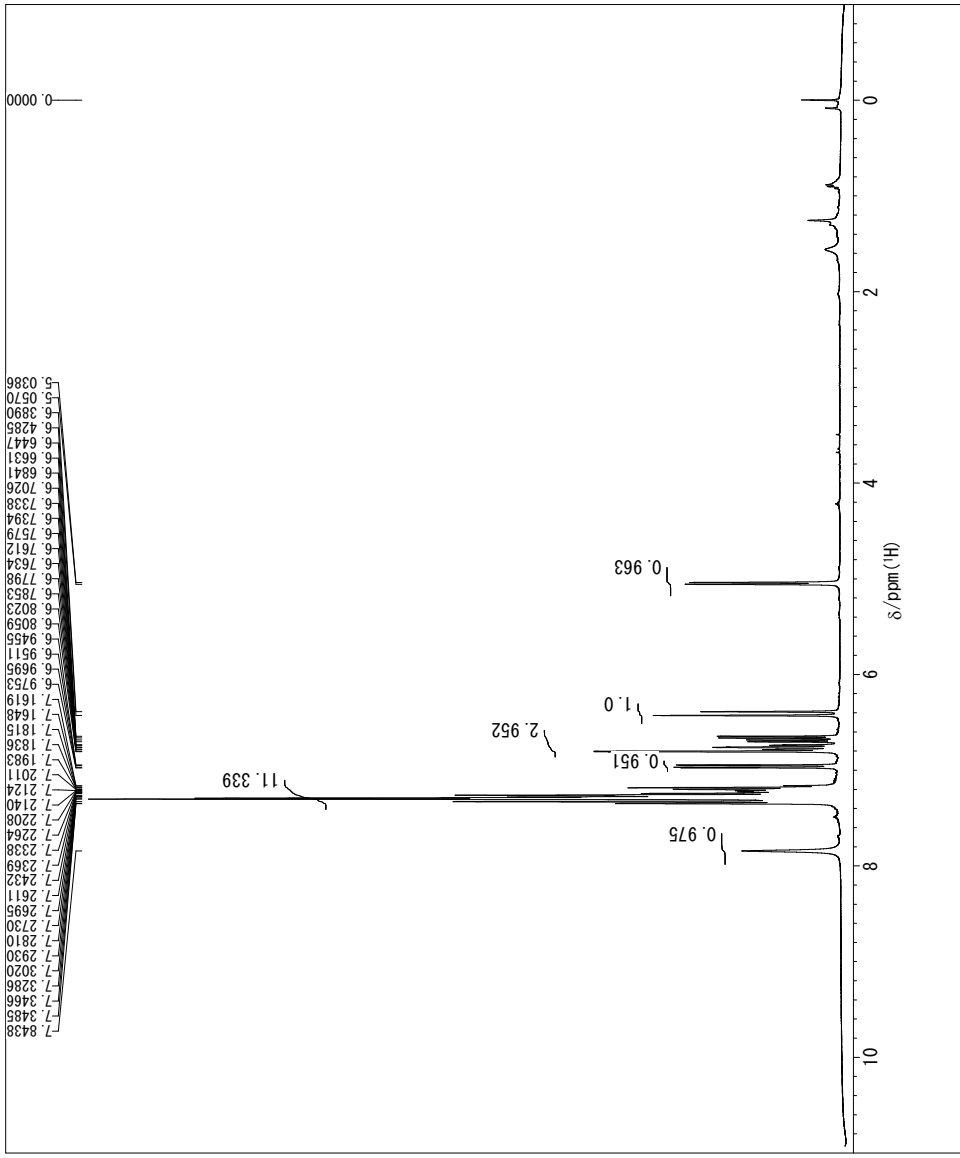

DFILE YKYOUSETI06-HDKYOUSETI06-HD  
 ¥2022年度¥M2¥高谷¥修論¥帰属¥  
 一夕¥NMR¥基質検討(CYCLOHEX, TH  
 F, CS2C03) ¥6-F (EXP59) ¥4-01355  
 C¥H¥fid  
 ORGFILE YKYOUSETI06-HDKYOUSETI06-  
 HD¥2022年度¥M2¥高谷¥修論¥帰属¥  
 一夕¥NMR¥基質検讨(CYCLOHEX,  
 TH, CS2C03) ¥6-F (EXP59) ¥4-013  
 55C¥H¥fid  
 DATIM 02/Aug/2021 10:58:56  
 COMNT

OBNUC <sup>13</sup>C  
 EXMOD ZGPC30>  
 OFR 100.63 MHz  
 OBSSET 0.0 kHz  
 OBFIN 11066.5 Hz  
 POINT 131072(ZeroFill  
 :x4)  
 FREQU 24038.46 Hz  
 SCANS 256  
 ACQTM 1.3631 s  
 PD 2.0 s  
 PWL 10.0 µs  
 SLVNT 24.81 °C  
 EXREF CDCl<sub>2</sub>>  
 BF 77.0 ppm  
 RGAIN 0.7336 Hz  
 203  
 PRNT\_DATE 2022/Dec/14 18:53:49

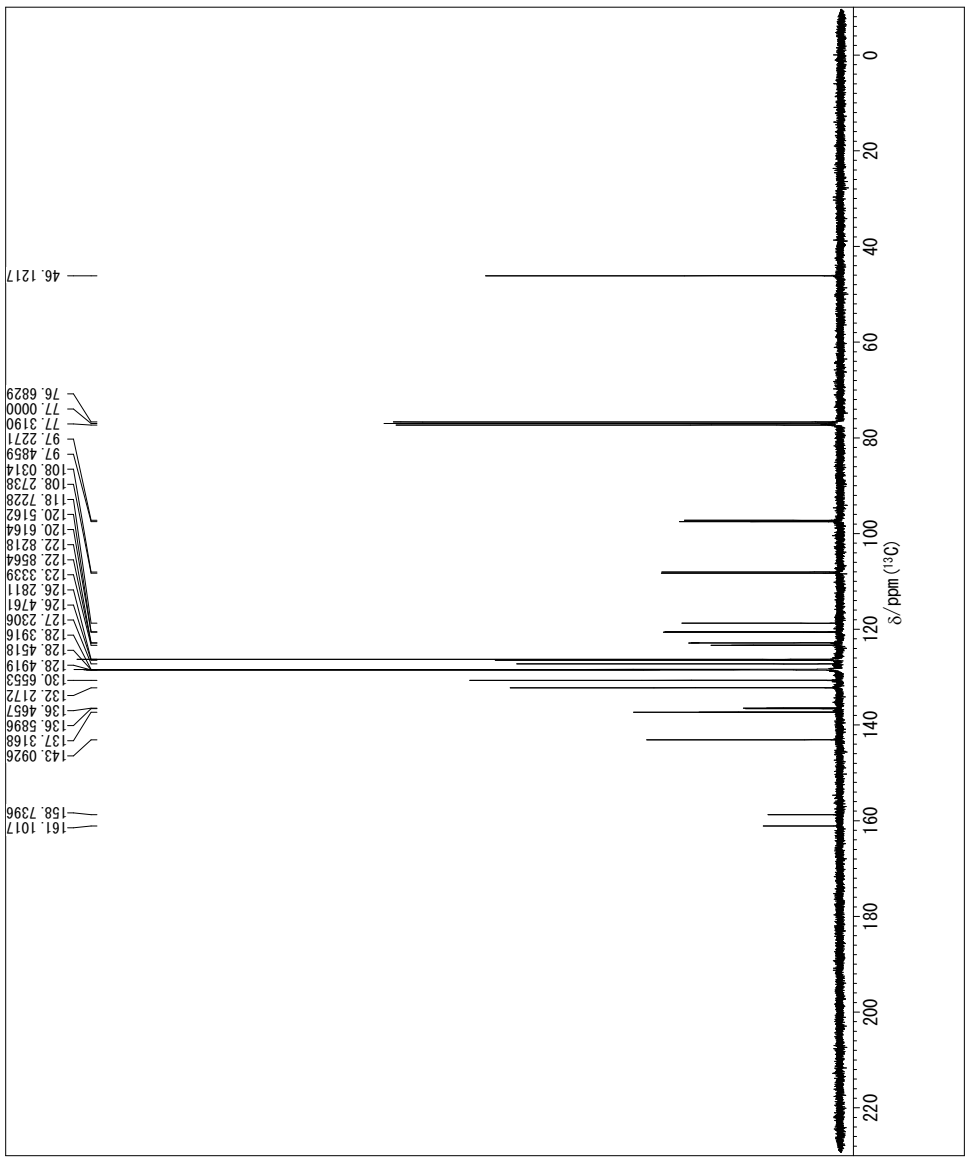

# クロマトグラム

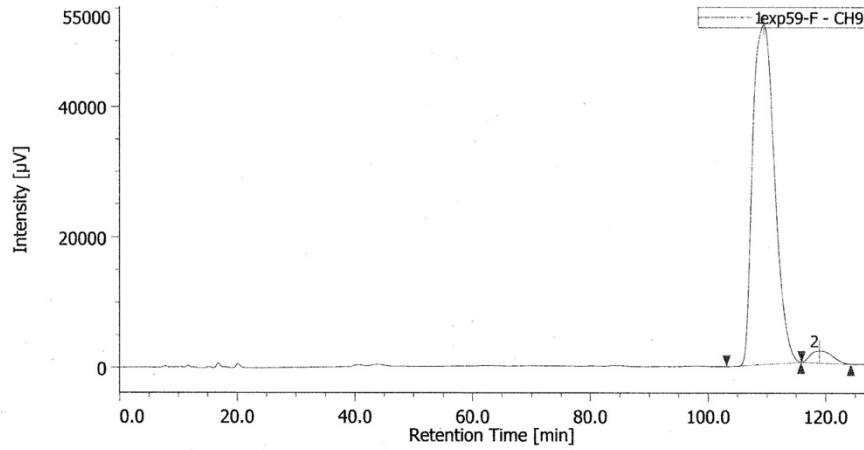

**クロマトグラム情報**  
 ユーザー名 3385  
 更新日時 2021/08/06 19:14:40  
 コメント IA,0.45ml/min,Hex:EtOH=99.5:0.5,254nm,rt  
 HPLC システム名 HPLC-1  
 測定日 2021/08/06 17:06:21  
 注入量 1.00 [μL]  
 サンプル# 1  
 プロジェクト名 2019system1  
 取込時間 180.0 [min]  
 測定シーケンス 1-00972 takaya  
 コントロールメソッド 2019system1  
 ピークIDテーブル  
 検査線テーブル  
 追加情報 .4h

**チャンネル情報+ピーク情報**  
 クロマトグラム名 exp59-F-CH9  
 サンプル名  
 チャンネル名 254.0nm  
 サンプル間隔 200 [msec]  
 波形処理メソッド (マニュアル)

| # | ピーク名    | CH | tR [min] | Area [μV·sec] | Height [μV] | Area%  | Height% |
|---|---------|----|----------|---------------|-------------|--------|---------|
| 1 | Unknown | 9  | 109.43   | 13519009      | 52008       | 96.596 | 96.561  |
| 2 | Unknown | 9  | 118.89   | 476411        | 1852        | 3.404  | 3.439   |

Chiral phase HPLC chart of (±)-4d

クロマトグラム

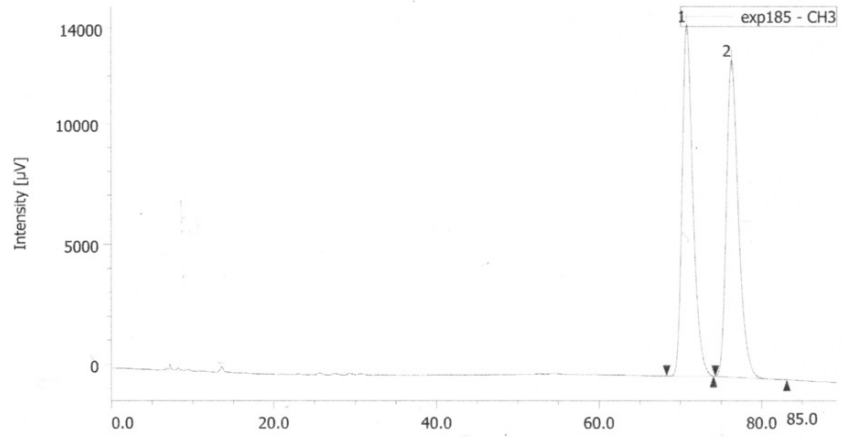

**クロマトグラム情報**  
 ユーザー名 3385  
 更新日時 2012/08/01 14:44:04  
 コメント IA,flow0.5,Hex:EtOH=99:1  
 HPLC システム名 HPLC-2  
 測定日 2012/08/01 13:14:48  
 注入量 1.00 [μL]  
 サンプル# 1  
 プロジェクト名 2012system2  
 取込時間 600.0 [min]  
 測定シーケンス 2\_1430\_ishikawa  
 コントロールメソッド 2009system2\_600min  
 ピークIDテーブル  
 検量線テーブル  
 追加情報

**チャンネル情報+ピーク情報**  
 クロマトグラム名 exp185-CH3  
 サンプル名 6-F(rac)  
 チャンネル名 UV-970  
 サンプリグ間隔 500 [msec]  
 波形処理メソッド (マニュアル)

| # | ピーク名    | CH | tR [min] | 面積 [μVsec] | 高さ [μV] | 面積%    | 高さ%    | 定量値 | NTP   | 分離度   | シンメトリー係数 | 警告    |
|---|---------|----|----------|------------|---------|--------|--------|-----|-------|-------|----------|-------|
| 1 | Unknown | 3  | 70.775   | 1352527    | 14639   | 49.956 | 52.590 | N/A | 14612 | 2.223 |          | 1.325 |
| 2 | Unknown | 3  | 76.267   | 1354934    | 13197   | 50.044 | 47.410 | N/A | 13642 | N/A   |          | 1.332 |

<sup>1</sup>H and <sup>13</sup>C NMR, and chiral phase HPLC chart of (*S*)-**4e**

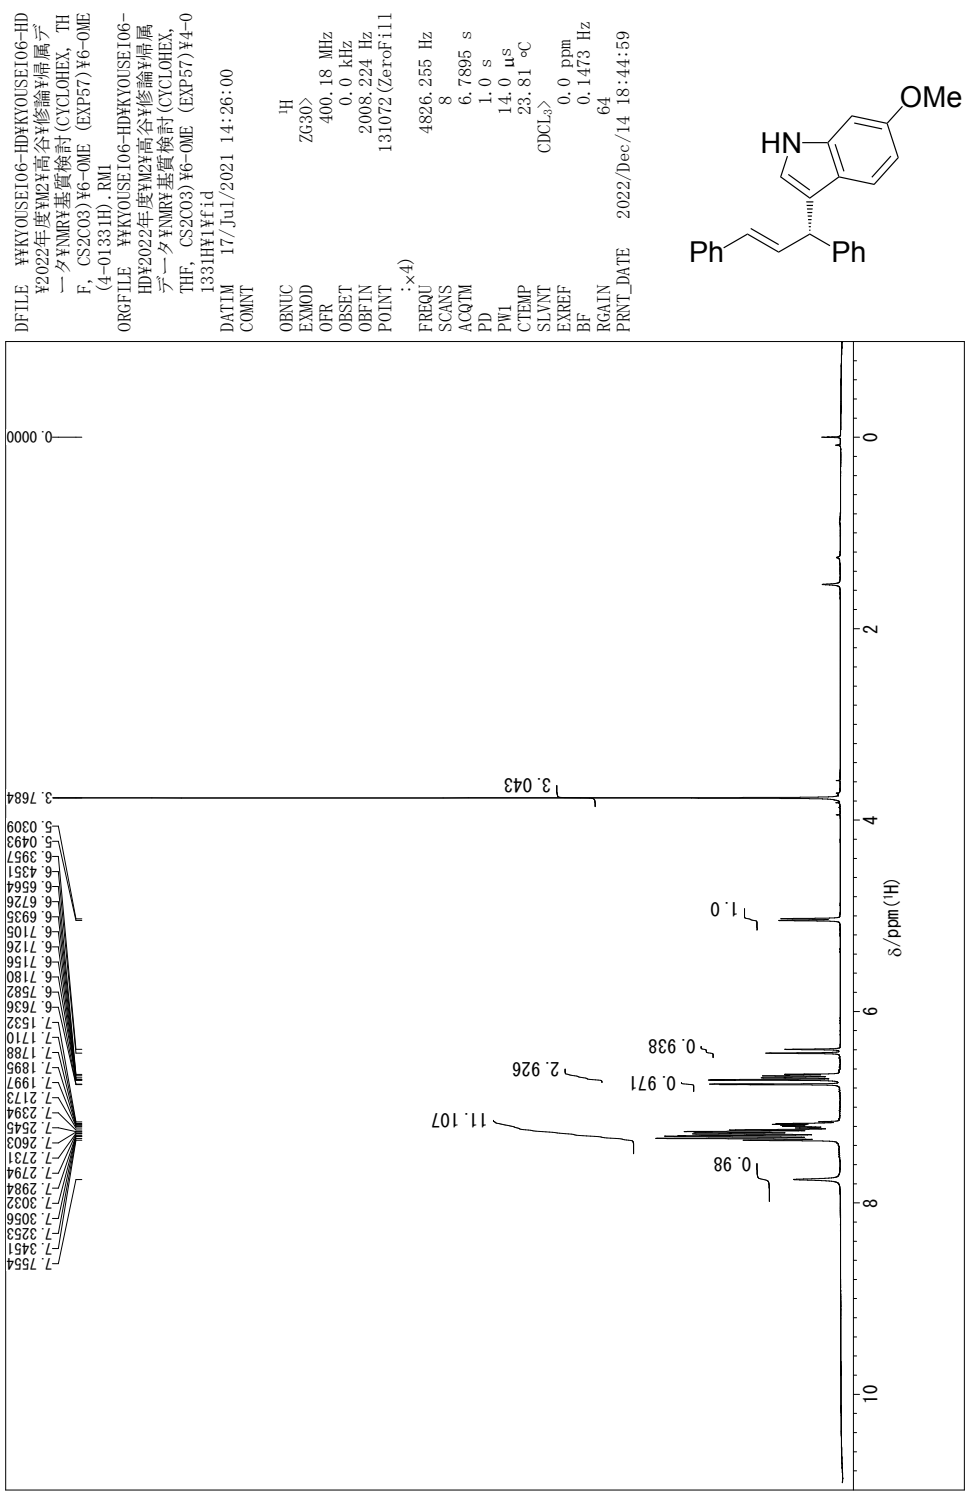



DFILE YKYOUSEI06-HDKYOUSEI06-HD  
 ¥2022年度¥M2¥高谷¥修論¥帰属¥  
 一夕¥NMR¥基質検討(CYCLOHEX, TH  
 F, CS2C03) ¥6-OME (EXP57) ¥4-013  
 31CH1Yfid  
 ORGFILE YKYOUSEI06-HDKYOUSEI06-  
 HD¥2022年度¥M2¥高谷¥修論¥帰属¥  
 一夕¥NMR¥基質検討(CYCLOHEX,  
 TH, CS2C03) ¥6-OME (EXP57) ¥4-0  
 1331CY1Yfid  
 DATIM 17/Jul/2021 14:43:54  
 COMNT

<sup>13</sup>C  
 ZGPC30>  
 100.63 MHz  
 0.0 kHz  
 11066.5 Hz  
 131072(ZeroFill  
 :x4)  
 24038.46 Hz  
 256  
 1.3631 s  
 2.0 s  
 10.0  $\mu$ s  
 24.71 °C  
 CDCl<sub>2</sub>>  
 77.0 ppm  
 0.7336 Hz  
 203  
 PRNT\_DATE 2022/Dec/13 11:39:18

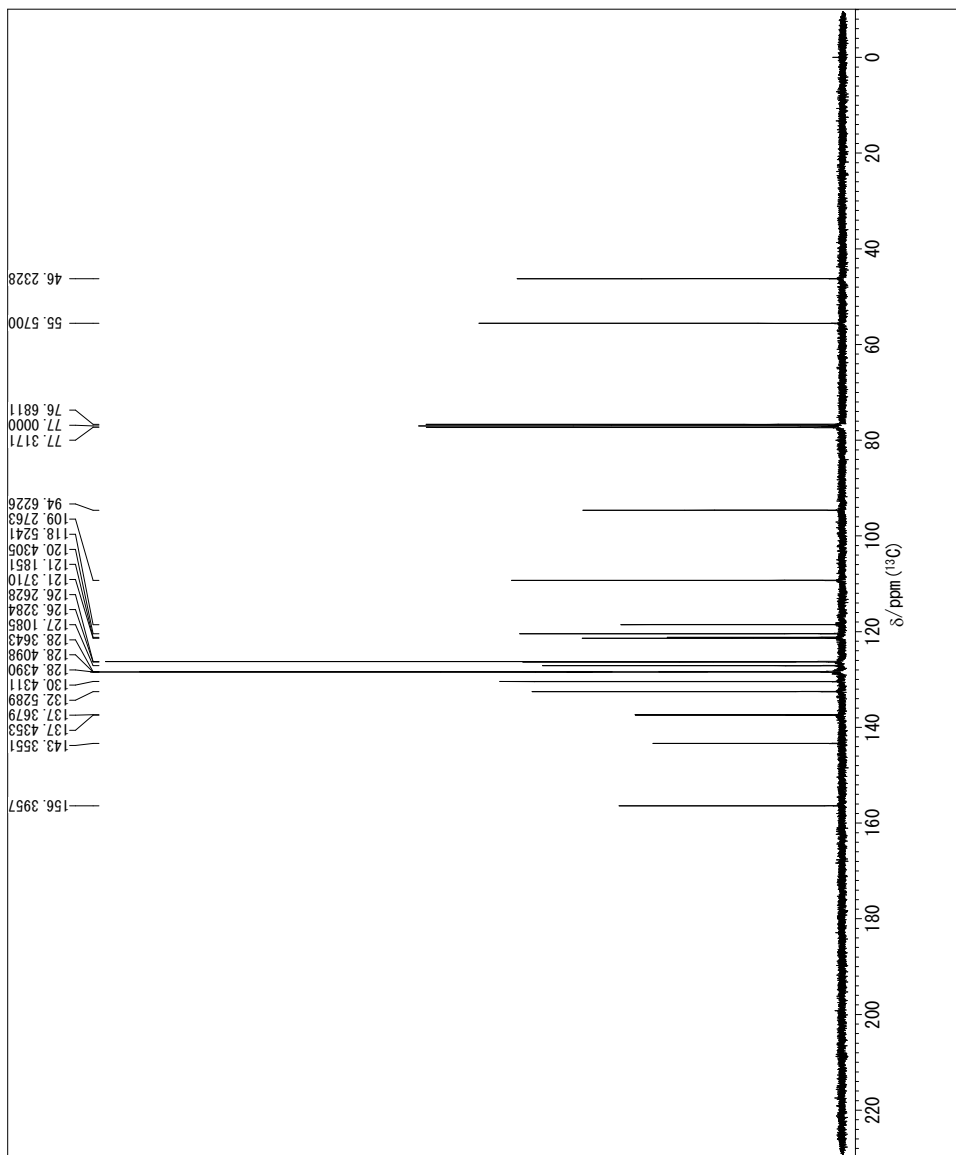

# クロマトグラム

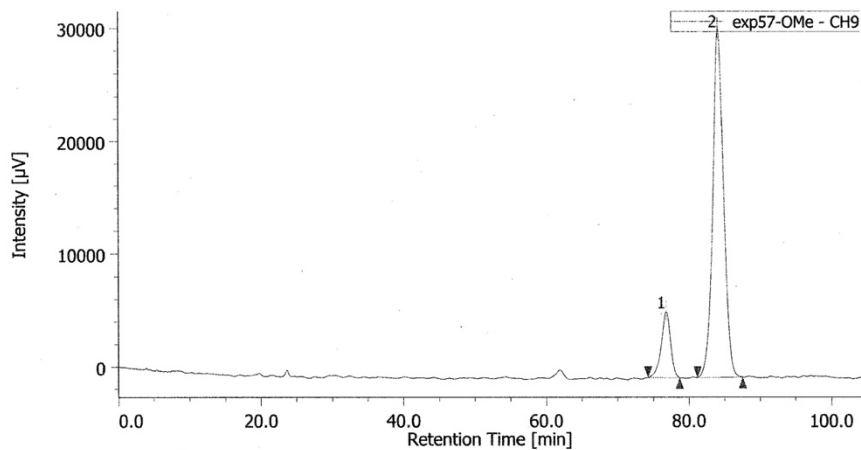

**クロマトグラム情報**  
 ユーザー名 3385  
 更新日時 2021/07/19 12:17:17  
 コメント IB,0.9ml/min,Hex:EtOH=99:1,254nm,rt  
 HPLC システム名 HPLC-1  
 測定日 2021/07/19 10:30:12  
 注入量 1.00 [μL]  
 サンプル# 1  
 プロジェクト名 2019system1  
 取込時間 180.0 [min]  
 測定シーケンス 1-00953 takaya  
 コントロールメソッド 2019system1  
 ピークIDテーブル  
 検量線テーブル  
 追加情報 .4h

**チャンネル情報+ピーク情報**  
 クロマトグラム名 exp57-OMe-CH9  
 サンプル名  
 チャンネル名 254.0nm  
 サンプル間隔 200 [msec]  
 波形処理メソッド (マニュアル)

| # | ピーク名    | CH | tR [min] | Area [μV·sec] | Height [μV] | Area%  | Height% |
|---|---------|----|----------|---------------|-------------|--------|---------|
| 1 | Unknown | 9  | 76.81    | 533842        | 5651        | 14.209 | 15.945  |
| 2 | Unknown | 9  | 84.10    | 3223190       | 30844       | 85.791 | 84.055  |

Chiral phase HPLC chart of (±)-4e

クロマトグラム

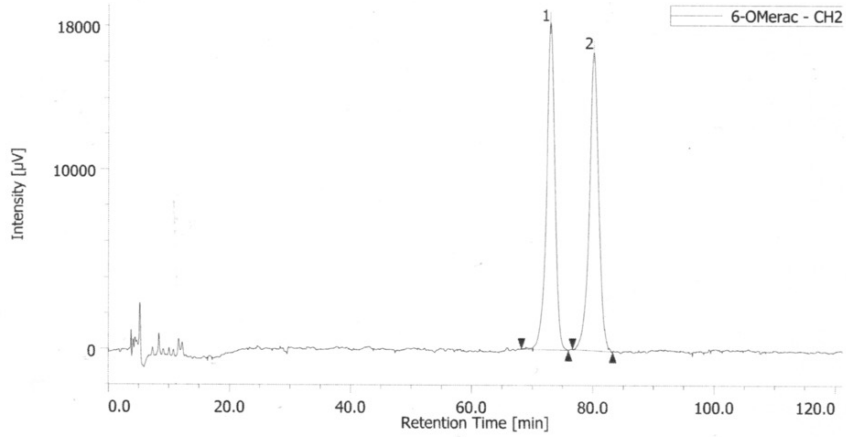

クロマトグラム情報  
 ユーザー名 3385  
 更新日時 2018/12/13 16:58:32  
 コメント IB, 0.9mL/min, Hex:EtOH=99:1  
 HPLC システム名 HPLC-2  
 測定日 2018/12/13 14:57:20  
 注入量 1.00 [μL]  
 サンプル# 1  
 プロジェクト名 2015system2  
 取込時間 180.0 [min]  
 測定シーケンス 2.46415 yamaguchi  
 コントロールメソッド 2009system2\_600min\_2  
 ピークIDテーブル  
 検量線テーブル  
 追加情報

チャンネル情報+ピーク情報  
 クロマトグラム名 6-OMerac-CH2  
 サンプル名  
 チャンネル名 CD-2095-UV  
 サンプリング間隔 500 [msec]  
 波形処理メソッド (マニュアル)

| # | ピーク名    | CH | tR [min] | area [μV·sec] | area%  | height [μV] | height% |
|---|---------|----|----------|---------------|--------|-------------|---------|
| 1 | Unknown | 2  | 72.967   | 1784256       | 49.968 | 18190       | 52.301  |
| 2 | Unknown | 2  | 80.117   | 1786517       | 50.032 | 16589       | 47.699  |

$^1\text{H}$  and  $^{13}\text{C}$  NMR, and chiral phase HPLC chart of (*S*)-**4f**

DFILE YKYOUSEI06-HDKYOUSEI06-HD  
 ¥2022年度¥M2¥高谷¥修論¥帰属¥  
 一夕¥NMR¥基質¥検討 (CYCLOHEX, TH  
 F, CS2C03) ¥6-OBN (EXP61) ¥6-OBN  
 (4-01376H). RMI  
 ORGFILE YKYOUSEI06-HDKYOUSEI06-  
 HD¥2022年度¥M2¥高谷¥修論¥帰属¥  
 デ一夕¥NMR¥基質¥検討 (CYCLOHEX,  
 THF, CS2C03) ¥6-OBN (EXP61) ¥4-0  
 1376H1Vfid  
 DATIM 23/Aug/2021 15:03:34  
 COMNT  
 OBNIC  $^1\text{H}$   
 EXMOD ZG30>  
 OFR 400.18 MHz  
 OBSET 0.0 kHz  
 OBFIN 2008.224 Hz  
 POINT 131072 (ZeroFill  
 :x4)  
 FREQU 4826.255 Hz  
 SCANS 8  
 ACQTM 6.7895 s  
 PD 1.0 s  
 PWI 14.0  $\mu\text{s}$   
 CTEMP 24.41  $^{\circ}\text{C}$   
 SLVNT  $\text{CDCl}_3$ >  
 EXREF 0.0 ppm  
 BF 0.1473 Hz  
 RGAIN 45  
 PRNT\_DATE 2022/Dec/14 18:42:10

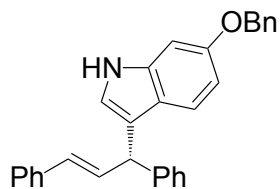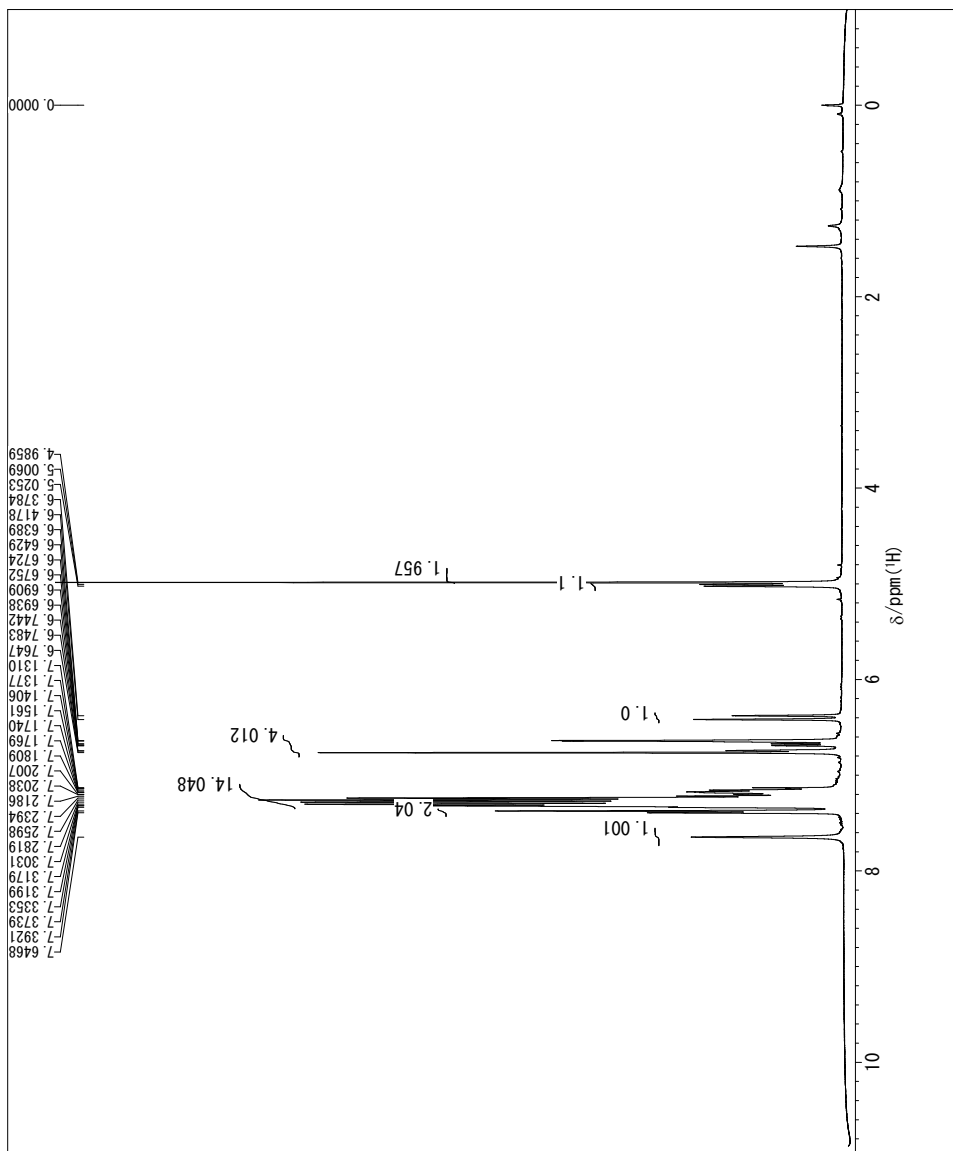

DFILE YKYOUSEI06-HDKYOUSEI06-HD  
 ¥2022年度¥M2¥高谷¥修論¥附属¥  
 一夕¥NMR¥基質検討(CYCLOHEX, TH  
 F, CS2C03) ¥6-0BN (EXP61) ¥4-013  
 76CF1Yfid  
 ORGFIL YKYOUSEI06-HDKYOUSEI06-  
 HD¥2022年度¥M2¥高谷¥修論¥附属¥  
 一夕¥NMR¥基質検討(CYCLOHEX,  
 TH, CS2C03) ¥6-0BN (EXP61) ¥4-0  
 1376CF1Yfid  
 DATIM 23/Aug/2021 16:18:30  
 COMNT

<sup>13</sup>C  
 ZGPC30>  
 100.63 MHz  
 0.0 kHz  
 11066.5 Hz  
 131072(ZeroFill  
 :x4)  
 24038.46 Hz  
 512  
 1.3631 s  
 2.0 s  
 10.0  $\mu$ s  
 25.21 °C  
 CDCl<sub>2</sub>>  
 77.0 ppm  
 0.7336 Hz  
 203  
 PRNT\_DATE 2022/Dec/14 17:16:13

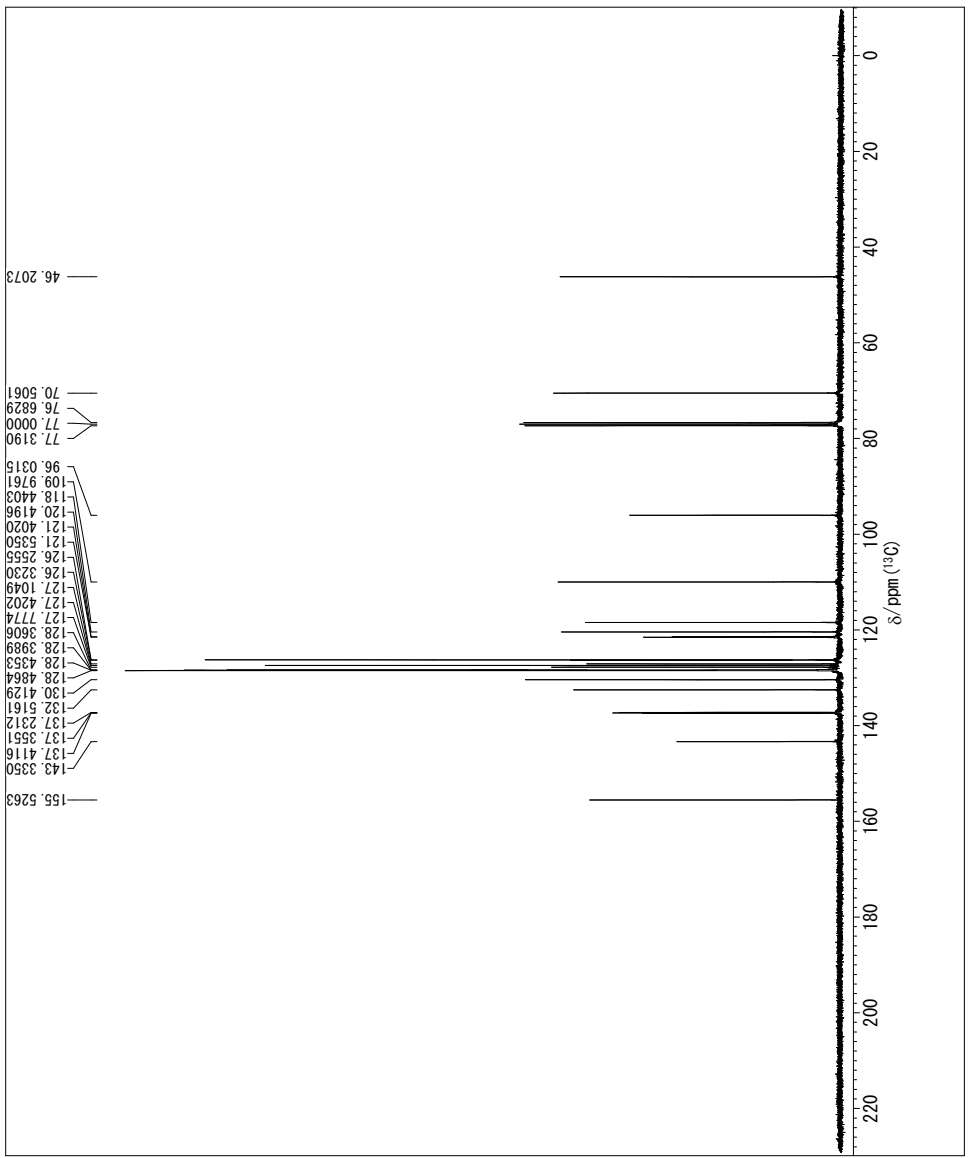

# クロマトグラム

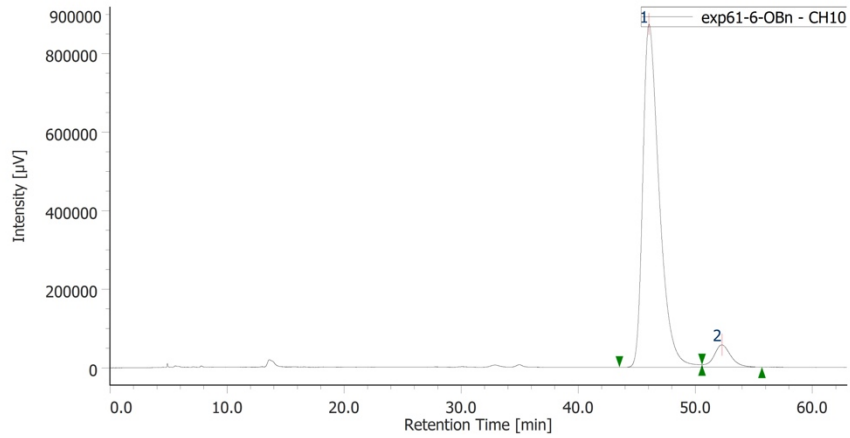

**クロマトグラム情報**  
 ユーザー名 3385  
 更新日時 2023/01/26 17:31:10  
 コメント IA, 0.7 mL/min, Hex:EtOH=98:2, UV=254nm, CD=254nm  
 HPLC システム名 HPLC-2  
 測定日 2023/01/26 16:07:07  
 注入量 1.00 [μL]  
 サンプル# 1  
 プロジェクト名 2022system2  
 取込時間 600.0 [min]  
 測定シーケンス 2-466703 takaya  
 コントロールメソッド 2009system2\_600min\_2  
 ピークIDテーブル  
 検量線テーブル  
 追加情報

**チャンネル情報 + ピーク情報**  
 クロマトグラム名 exp61-6-OBn-CH10  
 サンプル名  
 チャンネル名 254.0nm  
 サンプル間隔 100 [msec]  
 波形処理メソッド (マニュアル)

| # | ピーク名    | CH | tR [min] | area [μV·sec] | area%  | height [μV] | height% |
|---|---------|----|----------|---------------|--------|-------------|---------|
| 1 | Unknown | 10 | 46.027   | 85068244      | 93.737 | 872995      | 93.880  |
| 2 | Unknown | 10 | 52.272   | 5683602       | 6.263  | 56906       | 6.120   |

Chiral phase HPLC chart of (±)-4f

クロマトグラム

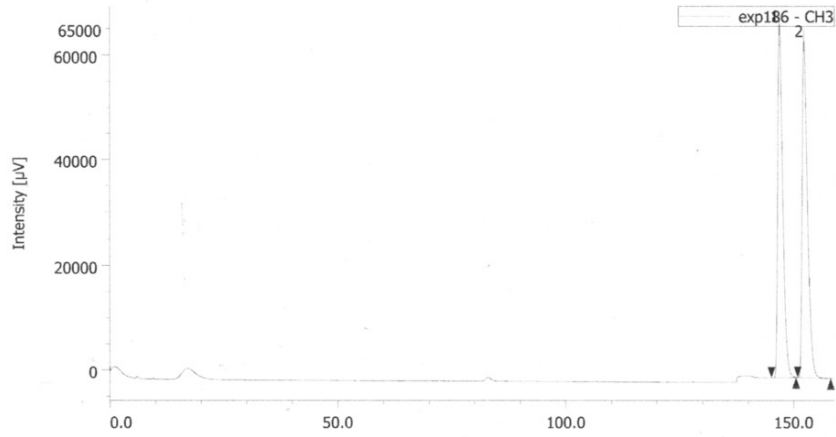

クロマトグラム情報  
 ユーザー名 3385  
 更新日時 2012/06/19 16:43:14  
 コメント IA-3.flow0.7.Hex:EtOH=99:1  
 HPLC システム名 HPLC-2  
 測定日 2012/06/19 14:04:21  
 注入量 1.00 [μL]  
 サンプル# 1  
 プロジェクト名 2012system2  
 取込時間 600.0 [min]  
 測定シーケンス 2\_1283 ishikawa  
 コントロールメソッド 2009system2\_600min  
 ピークIDテーブル  
 検量線テーブル  
 追加情報

チャンネル情報+ピーク情報  
 クロマトグラム名 exp186-CH3  
 サンプル名 6-BnO(rac)  
 チャンネル名 UV-970  
 サンプル間隔 500 [msec]  
 波形処理メソッド (マニュアル)

| # | ピーク名    | CH | tR [min] | 面積 [μVsec] | 高さ [μV] | 面積%    | 高さ%    | 定量値 | NTP   | 分離度   | シメトリ | 係数 | 警告    |
|---|---------|----|----------|------------|---------|--------|--------|-----|-------|-------|------|----|-------|
| 1 | Unknown | 3  | 146.842  | 5189847    | 67237   | 49.920 | 51.164 | N/A | 86735 | 2.649 |      |    | 1.707 |
| 2 | Unknown | 3  | 152.233  | 5206388    | 64179   | 50.080 | 48.836 | N/A | 85062 | N/A   |      |    | 1.694 |

<sup>1</sup>H and <sup>13</sup>C NMR, and chiral phase HPLC chart of (S)-4g

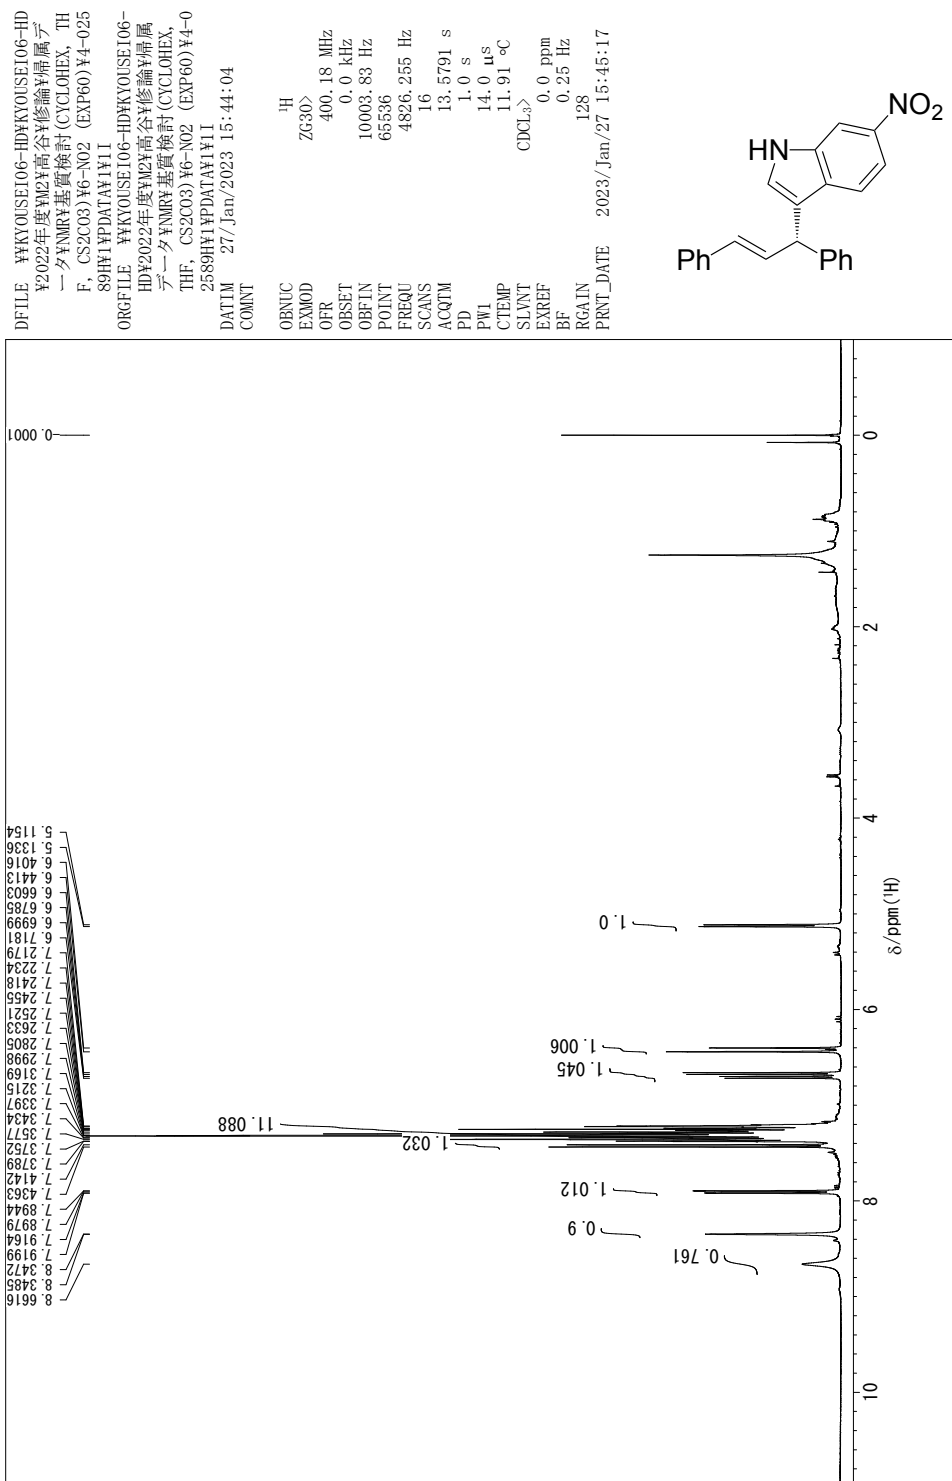



DFILE YKYOUSEI06-HDKYOUSEI06-HD  
 ¥2022年度¥M2¥高谷¥修論¥帰属¥予  
 一々¥NMR¥基質¥検討(CYCLOHEX, TH  
 F, CS2C03) ¥6-N02 (EXP60) ¥4-025  
 75CF1Yfid  
 ORGFILE YKYOUSEI06-HDKYOUSEI06-  
 HD¥2022年度¥M2¥高谷¥修論¥帰属¥  
 予一々¥NMR¥基質¥検討(CYCLOHEX,  
 THF, CS2C03) ¥6-N02 (EXP60) ¥4-0  
 2575CF1Yfid  
 DATIM 23/Jan/2023 14:20:05  
 COMNT

OBNUC <sup>13</sup>C  
 EXMOD ZGPC30>  
 OFR 100.63 MHz  
 OBSSET 0.0 kHz  
 OBFIN 11066.5 Hz  
 POINT 131072(ZeroFill  
 :x4)  
 FREQU 24038.46 Hz  
 SCANS 512  
 ACQTM 1.3631 s  
 PD 2.0 s  
 PWL 10.0 µs  
 SLVNT 15.21 °C  
 EXREF CDCl<sub>2</sub>>  
 BF 77.0 ppm  
 RGAIN 0.7336 Hz  
 203  
 PRNT\_DATE 2023/Jan/23 18:02:15

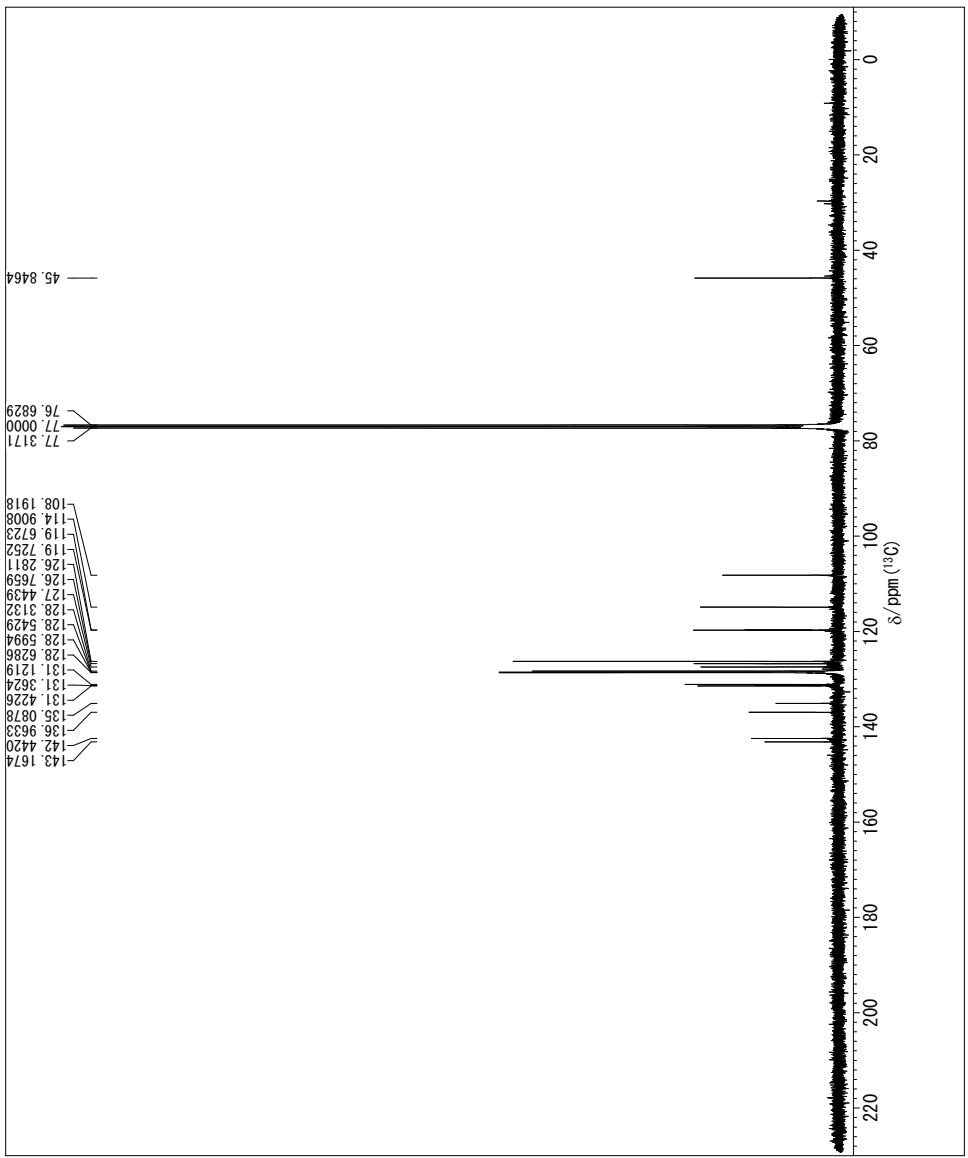

# クロマトグラム

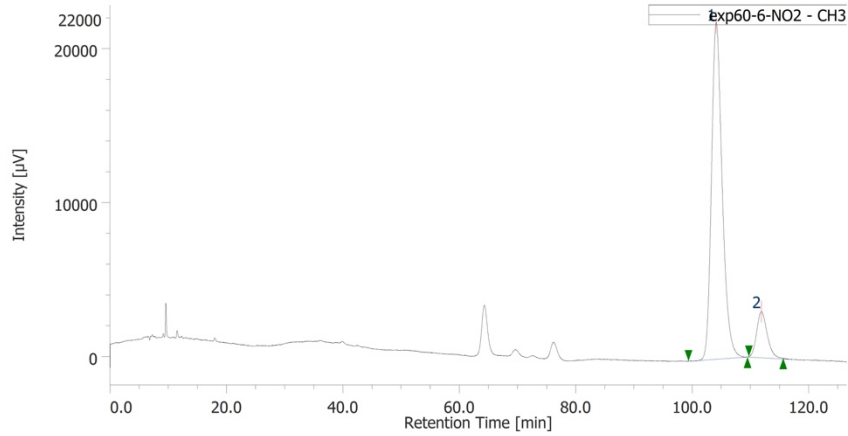

**クロマトグラム情報**  
 ユーザー名 3385  
 更新日時 2023/01/24 20:23:32  
 コメント IA-3, 0.5 mL/min, Hex:EtOH=98:2, UV 254 nm, CD 254 nm  
 HPLC システム名 HPLC-1  
 測定日 2023/01/24 18:16:56  
 注入量 1.00 [μL]  
 サンプル# 1  
 プロジェクト名 2022system1  
 取込時間 180.0 [min]  
 測定シーケンス 1-2277 takaya  
 コントロールメソッド system1\_2017  
 ピークIDテーブル  
 検量線テーブル  
 追加情報

**チャンネル情報 + ピーク情報**  
 クロマトグラム名 exp60-6-NO2-CH3  
 サンプル名  
 チャンネル名 UV-2075  
 サンプル間隔 500 [msec]  
 波形処理メソッド (マニュアル)

| # | ピーク名    | CH | tR [min] | 面積 [μV·sec] | 高さ [μV] | 面積%  | 高さ%  |
|---|---------|----|----------|-------------|---------|------|------|
| 1 | Unknown | 3  | 104.108  | 2797103     | 21886   | 88.1 | 88.0 |
| 2 | Unknown | 3  | 111.883  | 379126      | 2998    | 11.9 | 12.0 |

Chiral phase HPLC chart of (±)-4g

クロマトグラム

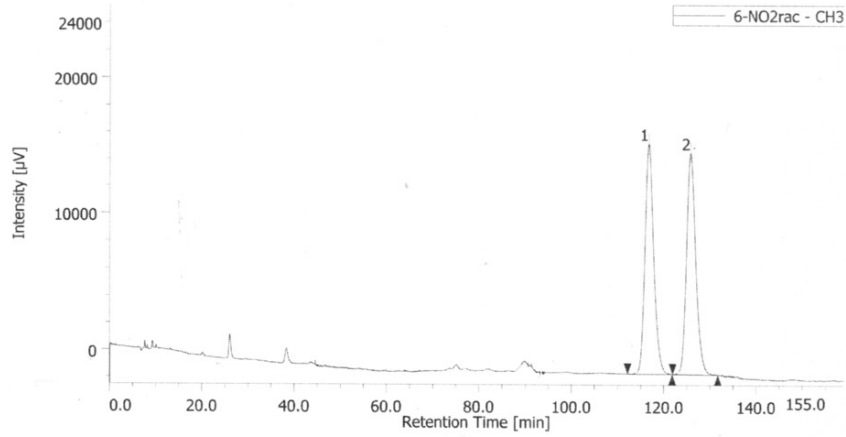

**クロマトグラム情報**  
 ユーザー名 3385  
 更新日時 2018/11/16 14:18:22  
 コメント IA-3, 0.5 mL/min, Hex:EtOH=98:2, UV 254 nm, CD 254 nm  
 HPLC システム名 HPLC-1  
 測定日 2018/11/16 11:39:25  
 注入量 1.00 [μL]  
 サンプル# 1  
 プロジェクト名 2017system1  
 取込時間 180.0 [min]  
 測定シーケンス 1\_5689 yamaguchi  
 コントロールメソッド system1\_2017  
 ピークIDテーブル  
 検量線テーブル  
 追加情報

**チャンネル情報+ピーク情報**  
 クロマトグラム名 6-NO2rac-CH3  
 サンプル名  
 チャンネル名 UV-2075  
 サンプリング間隔 500 [msec]  
 波形処理メソッド (マニュアル)

| #     | ピーク名    | CH | tR [min] | 面積 [μVsec] | 高さ [μV] | 面積%    | 高さ%    | 定量値     | NTP   | 分離度   | シムドリー係数 | 警告    |
|-------|---------|----|----------|------------|---------|--------|--------|---------|-------|-------|---------|-------|
| 1     | Unknown | 3  | 116.858  | 2275456    | 16872   | 50.133 | 51.006 | N/A     | 18258 | 2.595 |         | 1.265 |
| 2     | Unknown | 3  | 125.742  | 2263396    | 16207   | 49.867 | 48.994 | N/A     | 19883 | N/A   |         | 1.252 |
| Total |         |    |          | 4538852    | 33079   |        |        | 0.00000 |       |       |         |       |

$^1\text{H}$  and  $^{13}\text{C}$  NMR, and chiral phase HPLC chart of (*S*)-**4h**

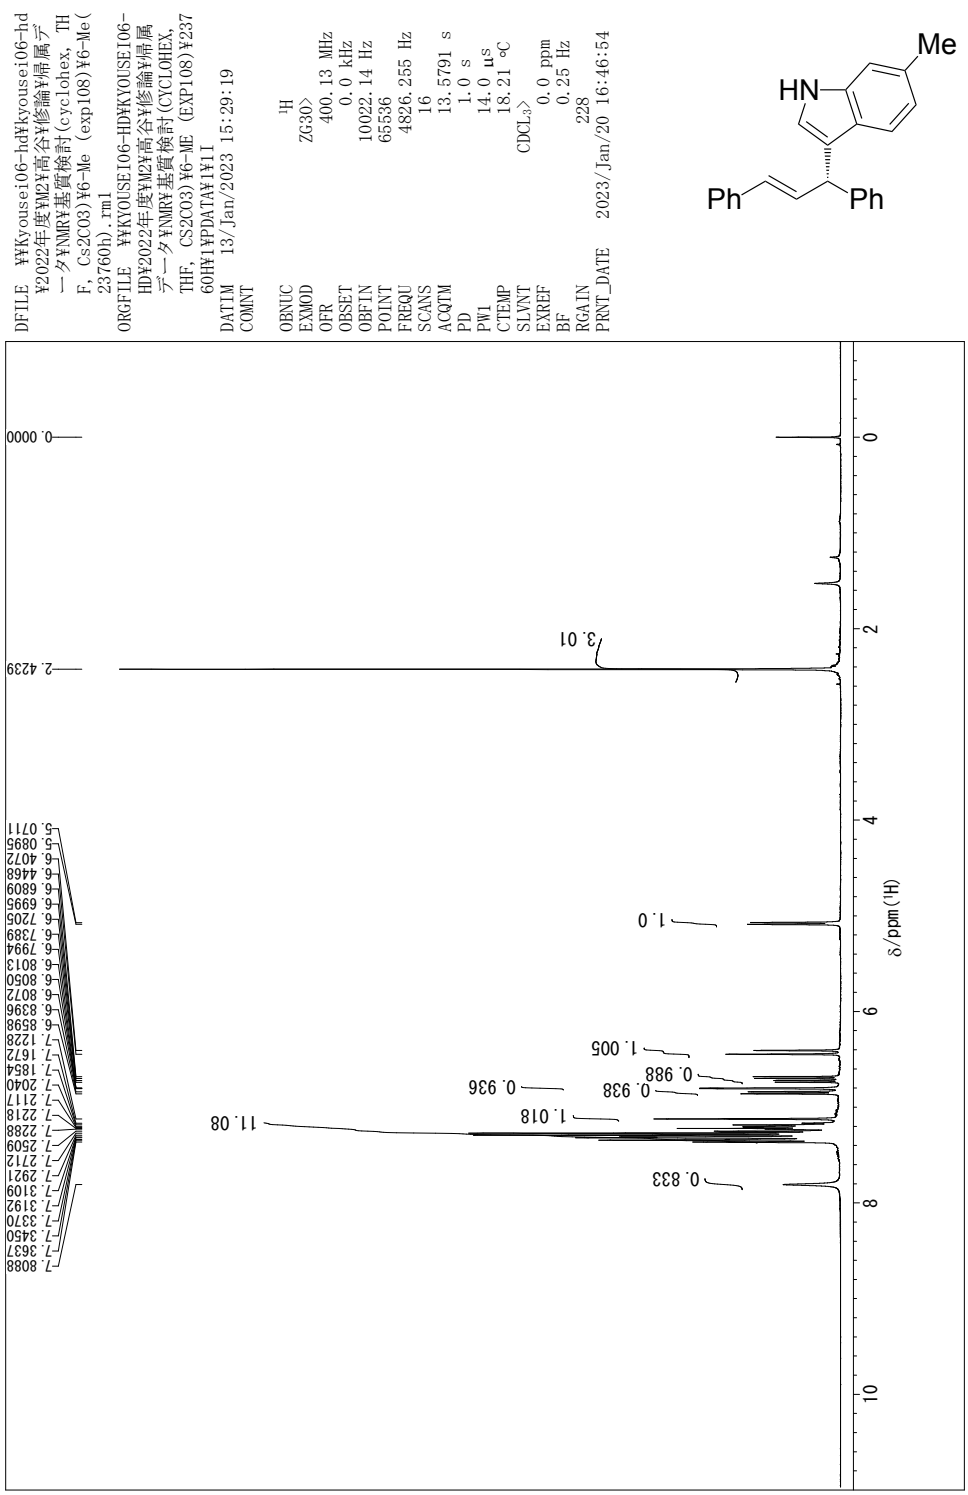

DFILE YKYOUSEI06-HDKYOUSEI06-HD  
 ¥2022年度¥M2¥高谷¥修論¥附属¥  
 一夕¥NMR¥基質検討(CYCLOHEX, TH  
 F, CS2C03) ¥6-ME (EXP108) ¥4-025  
 45C¥H¥fid  
 ORGFILE YKYOUSEI06-HDKYOUSEI06-  
 HD¥2022年度¥M2¥高谷¥修論¥附属¥  
 一夕¥NMR¥基質検討(CYCLOHEX,  
 TH, CS2C03) ¥6-ME (EXP108) ¥4-0  
 2545C¥H¥fid  
 DATIM 16/Jan/2023 15:23:02  
 COMNT

<sup>13</sup>C  
 ZGPC30>  
 100.63 MHz  
 0.0 kHz  
 11066.5 Hz  
 131072(ZeroFill  
 :x4)  
 24038.46 Hz  
 512  
 1.3631 s  
 2.0 s  
 10.0  $\mu$ s  
 15.51 °C  
 CDCl<sub>2</sub>>  
 77.0 ppm  
 0.7336 Hz  
 203  
 PRNT\_DATE 2023/Jan/16 15:50:52

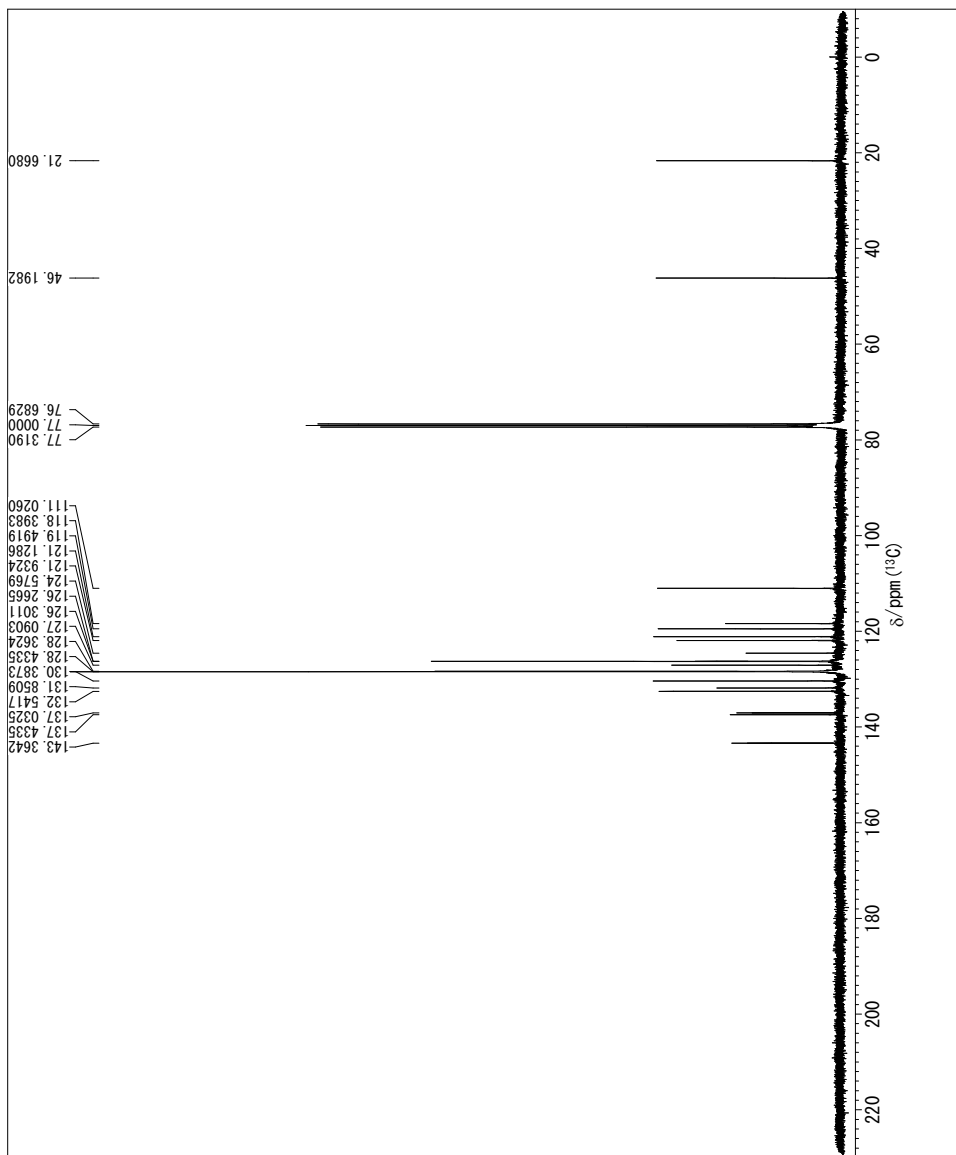

# クロマトグラム

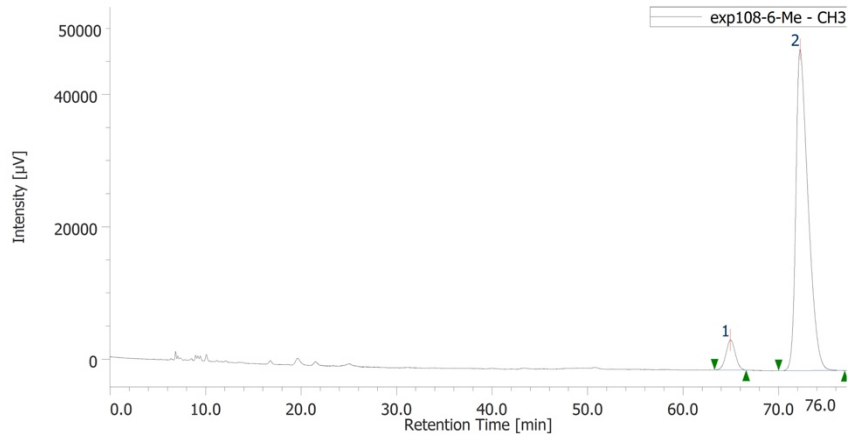

**クロマトグラム情報**  
 ユーザー名 3385  
 更新日時 2023/01/16 17:38:39  
 コメント IB, 0.7 mL/min, Hex:EtOH=99:1, UV 254 nm, CD 254 nm  
 HPLC システム名 HPLC-1  
 測定日 2023/01/16 15:35:17  
 注入量 1.00 [μL]  
 サンプル# 1  
 プロジェクト名 2022system1  
 取込時間 180.0 [min]  
 測定シーケンス 1-2262 takaya  
 コントロールメソッド system1\_2017  
 ピークIDテーブル  
 検量線テーブル  
 追加情報

**チャンネル情報 + ピーク情報**  
 クロマトグラム名 exp108-6-Me-CH3  
 サンプル名  
 チャンネル名 UV-2075  
 サンプリング間隔 500 [msec]  
 波形処理メソッド (マニュアル)

| # | ピーク名    | CH | tR [min] | 面積 [μV·sec] | 高さ [μV] | 面積%  | 高さ%  |
|---|---------|----|----------|-------------|---------|------|------|
| 1 | Unknown | 3  | 64.942   | 309337      | 4529    | 6.69 | 8.54 |
| 2 | Unknown | 3  | 72.225   | 4314196     | 48523   | 93.3 | 91.5 |

Chiral phase HPLC chart of (±)-4h

クロマトグラム

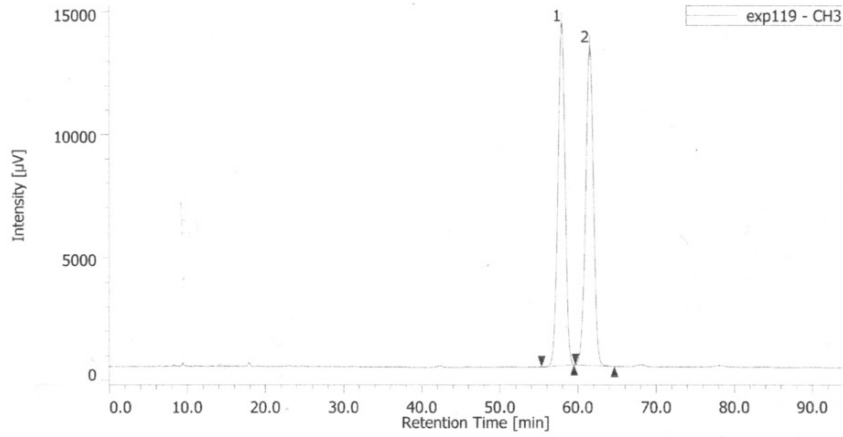

**クロマトグラム情報**  
 ユーザー名 3385  
 更新日時 2011/10/13 15:44:46  
 コメント IB.flow0.5,Hex:EtOH=99:1  
 HPLC システム名 HPLC-1  
 測定日 2011/10/13 14:10:56  
 注入量 1.00 [μL]  
 サンプル# 1  
 プロジェクト名 2009system1  
 取込時間 600.0 [min]  
 測定シーケンス 1\_0937 ishikawa  
 コントロールメソッド 2009system1\_温度制御なし\_600min  
 ピークIDテーブル  
 検量線テーブル  
 追加情報

**チャンネル情報+ピーク情報**  
 クロマトグラム名 exp119-CH3  
 サンプル名  
 チャンネル名 UV-2075  
 サンプリング間隔 500 [msec]  
 波形処理メソッド (マニュアル)

| # | ピーク名    | CH | tr [min] | 面積 [μV·sec] | 高さ [μV] | 面積%    | 高さ%    | 定量値 | NTP   | 分離度   | シンメトリー係数 | 警告    |
|---|---------|----|----------|-------------|---------|--------|--------|-----|-------|-------|----------|-------|
| 1 | Unknown | 3  | 57.892   | 900295      | 13939   | 49.962 | 51.774 | N/A | 18789 | 2.056 |          | 0.946 |
| 2 | Unknown | 3  | 61.483   | 901662      | 12984   | 50.038 | 48.226 | N/A | 18401 | N/A   |          | 0.960 |

$^1\text{H}$  and  $^{13}\text{C}$  NMR, and chiral phase HPLC chart of (*S*)-**4i**

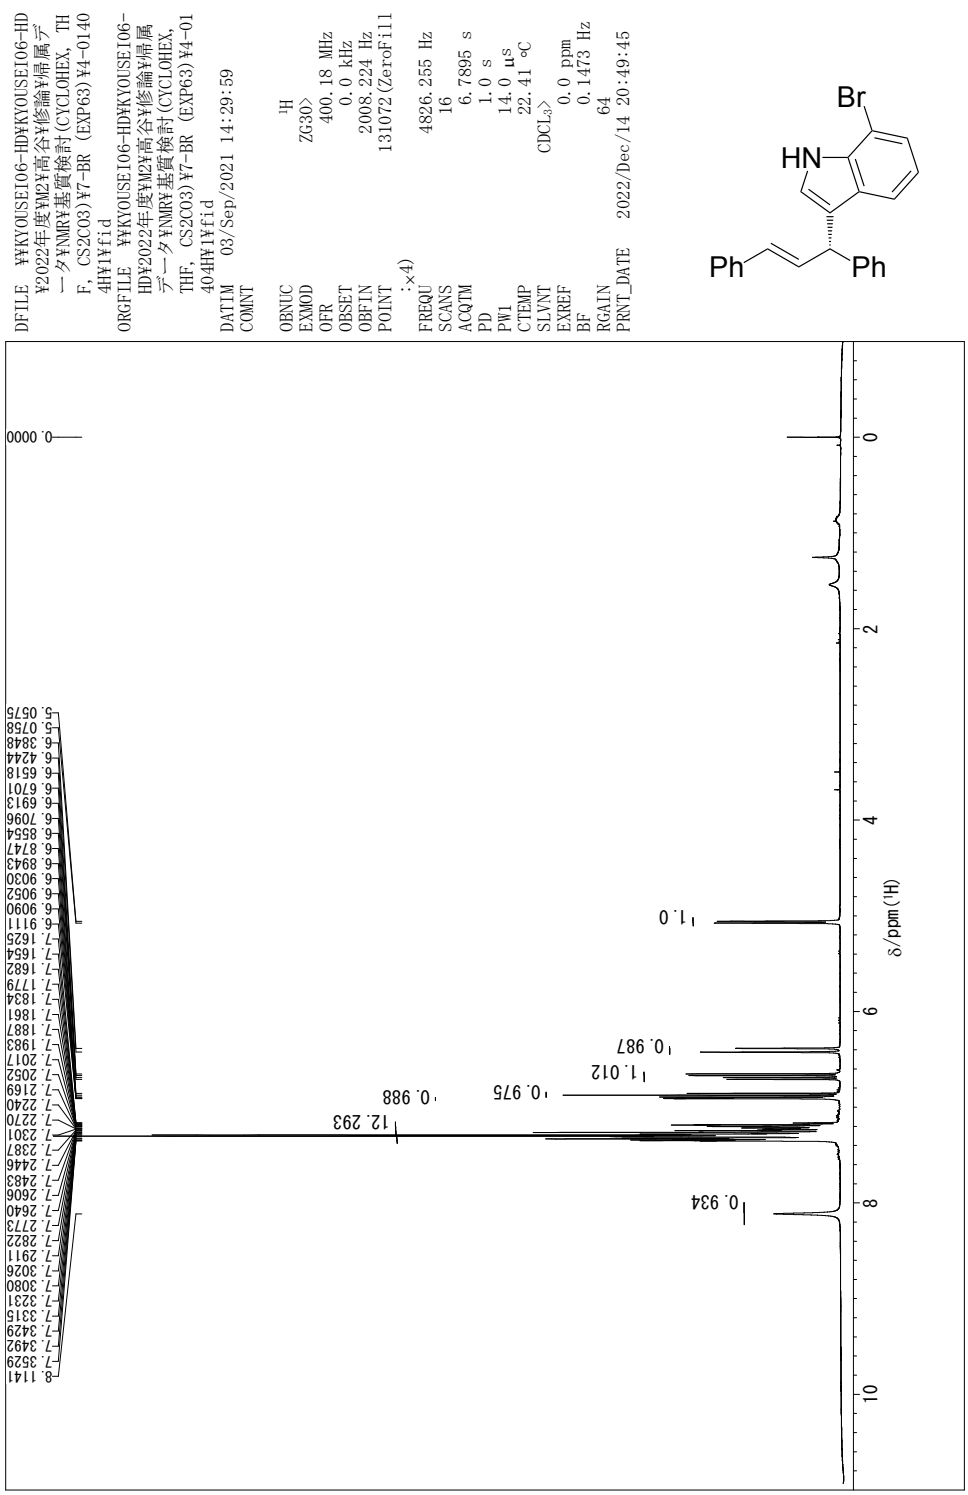



DFILE YKYOUSEI06-HDKYOUSEI06-HD  
 Y2022年度W2Y高谷修論Y帰属予  
 一夕NMRY基質検討(CYCLOHEX, TH  
 F, CS2C03)Y7-BR (EXP63)Y4-0140  
 4CHYfid  
 ORGFIL YKYOUSEI06-HDKYOUSEI06-  
 HDY2022年度W2Y高谷修論Y帰属  
 予一夕NMRY基質検討(CYCLOHEX,  
 TH, CS2C03)Y7-BR (EXP63)Y4-01  
 404CHYfid  
 DATIM 03/Sep/2021 15:43:00  
 COMNT

OBNUC <sup>13</sup>C  
 EXMOD ZGPC30>  
 OFR 100.63 MHz  
 OBSSET 0.0 kHz  
 OBFIN 11066.5 Hz  
 POINT 131072(ZeroFill  
 :x4)  
 FREQU 24038.46 Hz  
 SCANS 256  
 ACQTM 1.3631 s  
 PD 2.0 s  
 PWL 10.0  $\mu$ s  
 CTEMP 23.31  $^{\circ}$ C  
 SLVNT CDCl<sub>2</sub>>  
 EXREF 77.0 ppm  
 BF 0.7336 Hz  
 RGAIN 203  
 PRNT\_DATE 2022/Dec/14 20:54:27

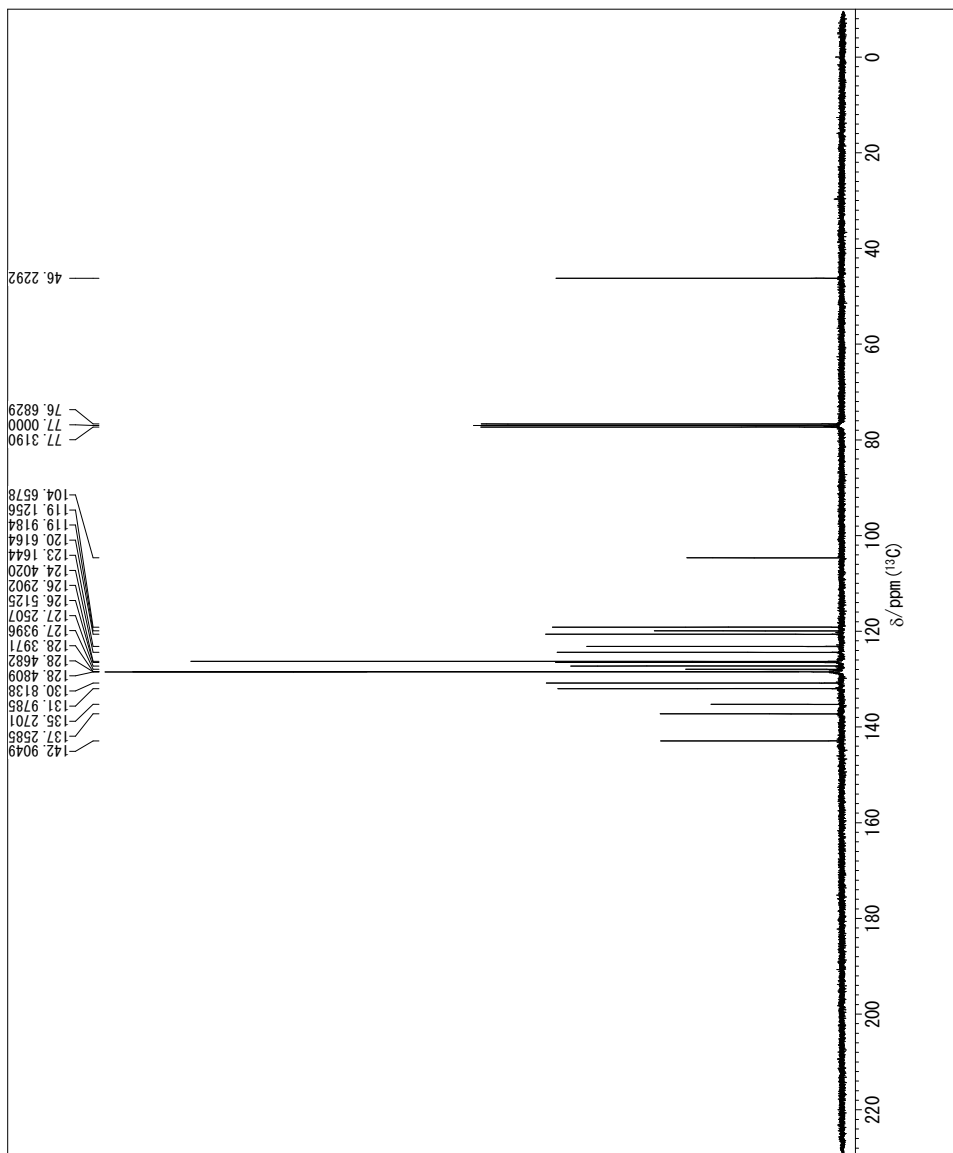

# クロマトグラム

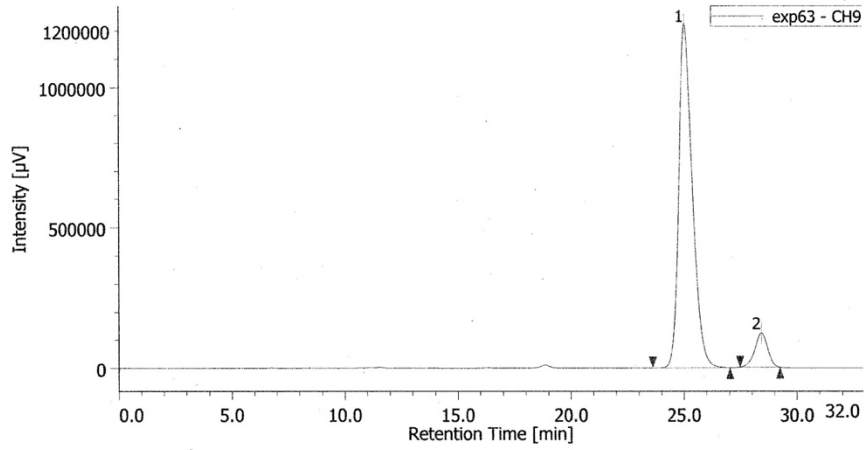

**クロマトグラム情報**  
 ユーザー名 3385  
 更新日時 2021/09/07 13:04:48  
 コメント IB.0.7ml/min,Hex:EtOH=99:1.254nm,rt  
 HPLC システム名 HPLC-1  
 測定日 2021/09/07 10:50:44  
 注入量 1.00 [μL]  
 サンプル# 1  
 プロジェクト名 2019system1  
 取込時間 180.0 [min]  
 測定シーケンス 1-01041 takaya  
 コントロールメソッド 2019system1  
 ピークIDテーブル  
 検査線テーブル  
 追加情報 .4h

**チャンネル情報+ピーク情報**  
 クロマトグラム名 exp63-CH9  
 サンプル名  
 チャンネル名 254.0nm  
 サンプル間隔 200 [msec]  
 波形処理メソッド (マニュアル)

| # | ピーク名    | CH | tR [min] | Area [μVsec] | Height [μV] | Area%  | Height% |
|---|---------|----|----------|--------------|-------------|--------|---------|
| 1 | Unknown | 9  | 25.02    | 50897594     | 1224564     | 91.381 | 90.928  |
| 2 | Unknown | 9  | 28.40    | 4800862      | 122174      | 8.619  | 9.072   |

Chiral phase HPLC chart of (±)-4i

クロマトグラム

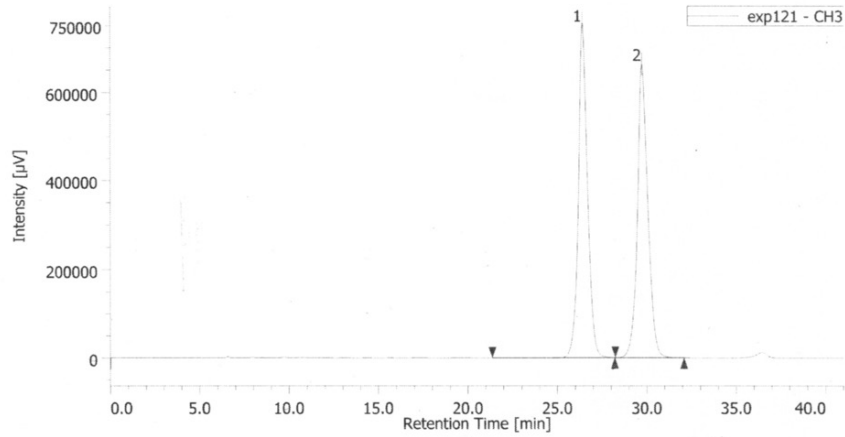

**クロマトグラム情報**  
 ユーザー名 3385  
 更新日時 2018/10/22 18:24:29  
 コメント IB, 0.7 mL/min, Hex:EtOH=99:1, UV 254 nm, CD 254 nm  
 HPLC システム名 HPLC-1  
 測定日 2018/10/22 17:43:24  
 注入量 1.00 [μL]  
 サンプル# 1  
 プロジェクト名 2017system1  
 取込時間 180.0 [min]  
 測定シーケンス 1\_5644 yamaguchi  
 コントロールメソッド system1\_2017  
 ピークIDテーブル  
 検量線テーブル  
 追加情報

**チャンネル情報+ピーク情報**  
 クロマトグラム名 exp121-CH3  
 サンプル名  
 チャンネル名 UV-2075  
 サンプリング間隔 500 [msec]  
 波形処理メソッド (マニュアル)

| # | ピーク名    | CH | tR [min] | 面積 [μVsec] | 高さ [μV] | 面積%    | 高さ%    | 定量値 | NTP   | 分離度   | シメトリ係数 | 警告 |
|---|---------|----|----------|------------|---------|--------|--------|-----|-------|-------|--------|----|
| 1 | Unknown | 3  | 26.392   | 26851159   | 754882  | 49.921 | 53.281 | N/A | 14765 | 3.570 | 1.108  |    |
| 2 | Unknown | 3  | 29.708   | 26936048   | 661910  | 50.079 | 46.719 | N/A | 14279 | N/A   | 1.124  |    |

<sup>1</sup>H and <sup>13</sup>C NMR, and chiral phase HPLC chart of (S)-4j

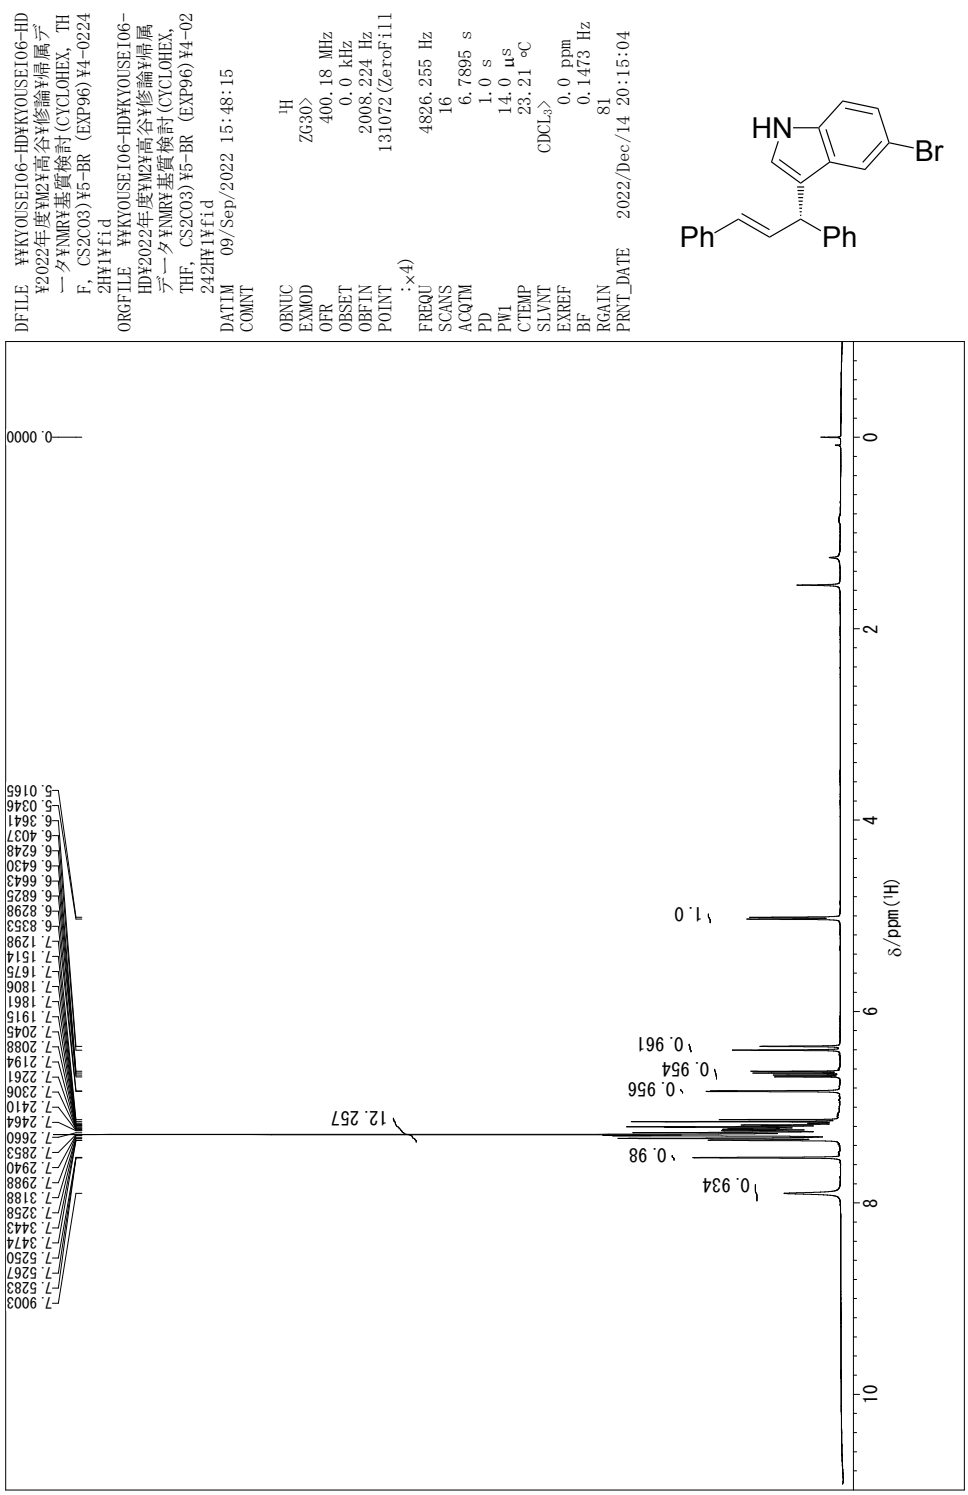

DFILE YKYOUSEI06-HDKYOUSEI06-HD  
 ¥2022年度¥M2¥高谷¥修論¥帰属¥  
 一夕¥NMR¥基質¥検討(CYCLOHEX, TH  
 F, CS2C03) ¥5-BR (EXP96) ¥4-0224  
 2CH1F1d  
 ORGFILE YKYOUSEI06-HDKYOUSEI06-  
 HD¥2022年度¥M2¥高谷¥修論¥帰属¥  
 一夕¥NMR¥基質¥検討(CYCLOHEX,  
 TH, CS2C03) ¥5-BR (EXP96) ¥4-02  
 242C11F1d  
 DATIM 09/Sep/2022 16:05:20  
 COMNT

OBNUC <sup>13</sup>C  
 EXMOD ZGPC30>  
 OFR 100.63 MHz  
 OBSSET 0.0 kHz  
 OBFIN 11066.5 Hz  
 POINT 131072(ZeroFill  
 :x4)  
 FREQU 24038.46 Hz  
 SCANS 256  
 ACQTM 1.3631 s  
 PD 2.0 s  
 PWL 10.0 µs  
 CTEMP 24.11 °C  
 SLVNT CDCl<sub>3</sub>>  
 EXREF 77.0 ppm  
 BF 0.7336 Hz  
 RGAIN 203  
 PRNT\_DATE 2022/Dec/14 20:20:59

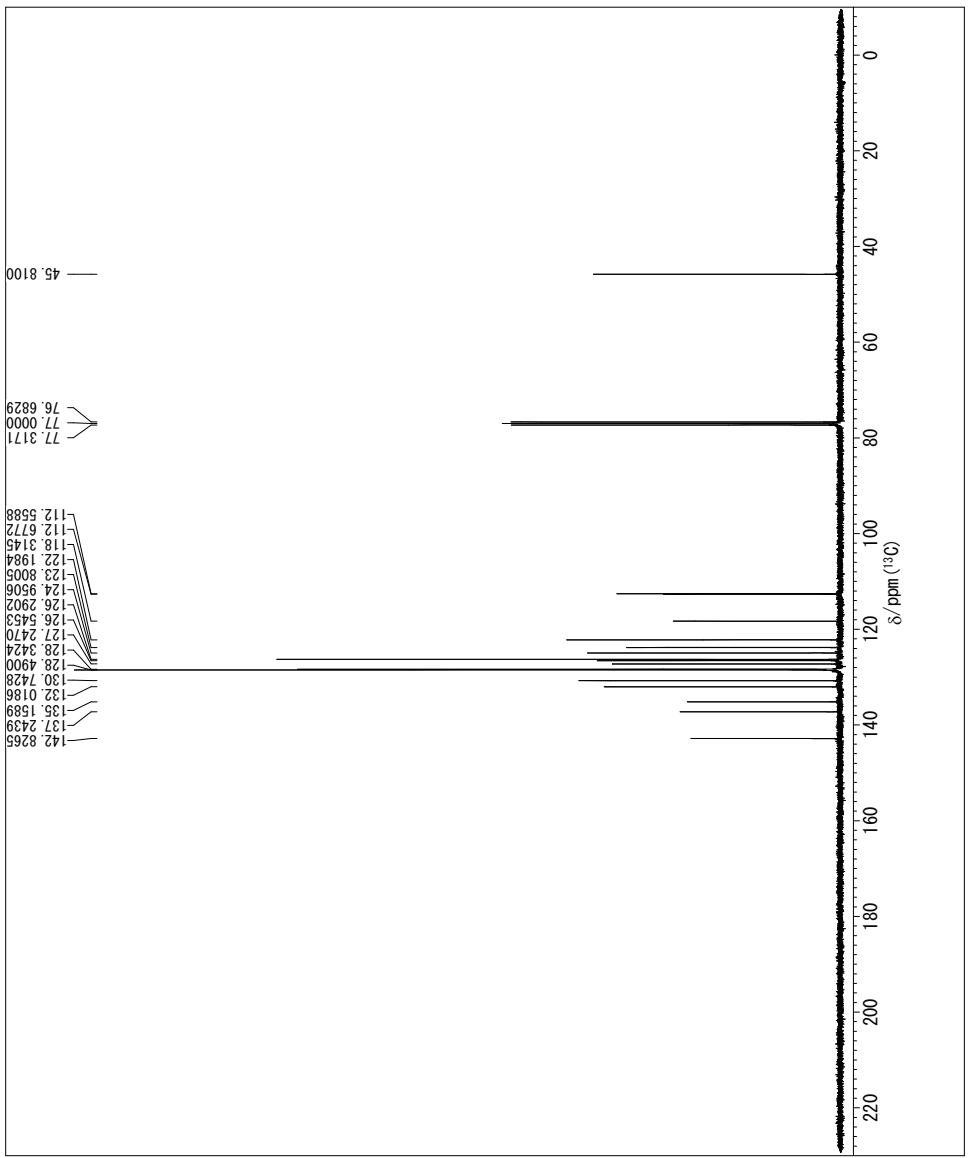

# クロマトグラム

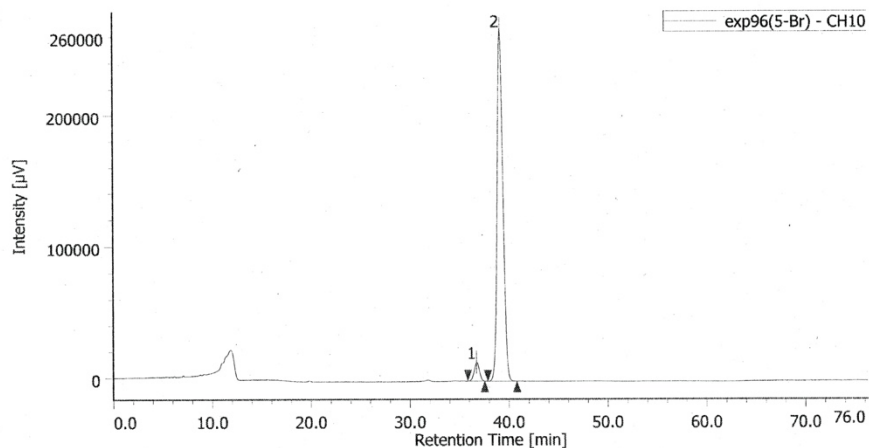

**クロマトグラム情報**  
 ユーザー名 3385  
 更新日時 2022/09/12 17:59:02  
 コメント IB, 0.9 mL/min, Hex:EtOH=99:1, UV=254nm, CD=254nm  
 HPLC システム名 HPLC-2  
 測定日 2022/09/12 16:42:42  
 注入量 1.00 [μL]  
 サンプル# 1  
 プロジェクト名 2022system2  
 取込時間 600.0 [min]  
 測定シーケンス 2-466679 takaya  
 コントロールメソッド 2009system2.600min\_2  
 ピークIDテーブル  
 検量線テーブル  
 追加情報

**チャンネル情報+ピーク情報**  
 クロマトグラム名 exp96(5-Br)-CH10  
 サンプル名  
 チャンネル名 254.0nm  
 サンプル間隔 100 [msec]  
 波形処理メソッド (マニュアル)

| # | ピーク名    | CH | TR [min] | area [μV·sec] | area%  | height [μV] | height% |
|---|---------|----|----------|---------------|--------|-------------|---------|
| 1 | Unknown | 10 | 36.727   | 521487        | 4.539  | 14221       | 5.033   |
| 2 | Unknown | 10 | 39.153   | 10968171      | 95.461 | 268330      | 94.967  |

Chiral phase HPLC chart of (±)-4j

クロマトグラム

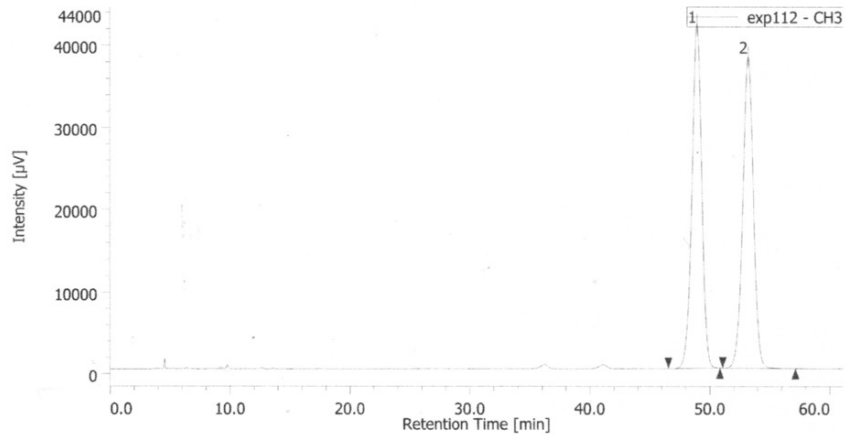

クロマトグラム情報  
 ユーザー名 3385  
 更新日時 2011/09/22 18:15:38  
 コメント IB,flow0.9,Hex:EtOH=99:1  
 HPLC システム名 HPLC-1  
 測定日 2011/09/22 17:14:31  
 注入量 1.00 [μL]  
 サンプル# 1  
 プロジェクト名 2009system1  
 取込時間 600.0 [min]  
 測定シーケンス 1\_0904 ishikawa  
 コントロールメソッド 2009system1\_温度制御なし\_600min  
 ピークIDテーブル  
 検量線テーブル  
 追加情報

チャンネル情報+ピーク情報  
 クロマトグラム名 exp112-CH3  
 サンプル名 5-Br indole  
 チャンネル名 UV-2075  
 サンプル間隔 500 [msec]  
 波形処理メソッド (マニュアル)

| # | ピーク名    | CH | TR [min] | 面積 [μV·sec] | 高さ [μV] | 面積%    | 高さ%    | 定量値 | NTP   | 分離度   | シメトリー係数 | 警告 |
|---|---------|----|----------|-------------|---------|--------|--------|-----|-------|-------|---------|----|
| 1 | Unknown | 3  | 48.925   | 2375311     | 41835   | 49.941 | 52.489 | N/A | 17744 | 2.757 | 0.941   |    |
| 2 | Unknown | 3  | 53.175   | 2380899     | 37867   | 50.059 | 47.511 | N/A | 17189 | N/A   | 0.983   |    |

<sup>1</sup>H and <sup>13</sup>C NMR, and chiral phase HPLC chart of (*S*)-**4k**

DFILE YKYOUSEI06-HDKYOUSEI06-HD  
 Y2022年度YMZ高谷修論帰属予  
 一夕YMRX基質検討(CYCLOHEX, TH  
 F, CS2C03)Y4-BR (EXP79)Y23652H  
 Y1Yfid  
 ORGFILE YKYOUSEI06-HDKYOUSEI06-  
 HDY2022年度YMZ高谷修論帰属  
 一夕YMRX基質検討(CYCLOHEX,  
 TH, CS2C03)Y4-BR (EXP79)Y2365  
 2HW1Yfid  
 DATIM 26/May/2022 18:53:32  
 COMNT  
 OBNIC <sup>1</sup>H  
 EXMOD ZG30>  
 OFR 400.13 MHz  
 OBSET 0.0 kHz  
 OBFIN 1996.017 Hz  
 POINT 131072(ZeroFill  
 :x4)  
 FREQU 4826.255 Hz  
 SCANS 16  
 ACQTM 6.7895 s  
 PD 1.0 s  
 PWI 14.0 μs  
 CTEMP 20.41 °C  
 SLVNT CDCl<sub>3</sub>>  
 EXREF 0.0 ppm  
 BF 0.1473 Hz  
 RGAIN 101  
 PRNT\_DATE 2022/Dec/14 20:32:52

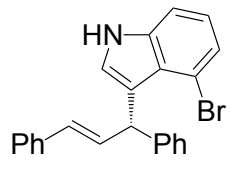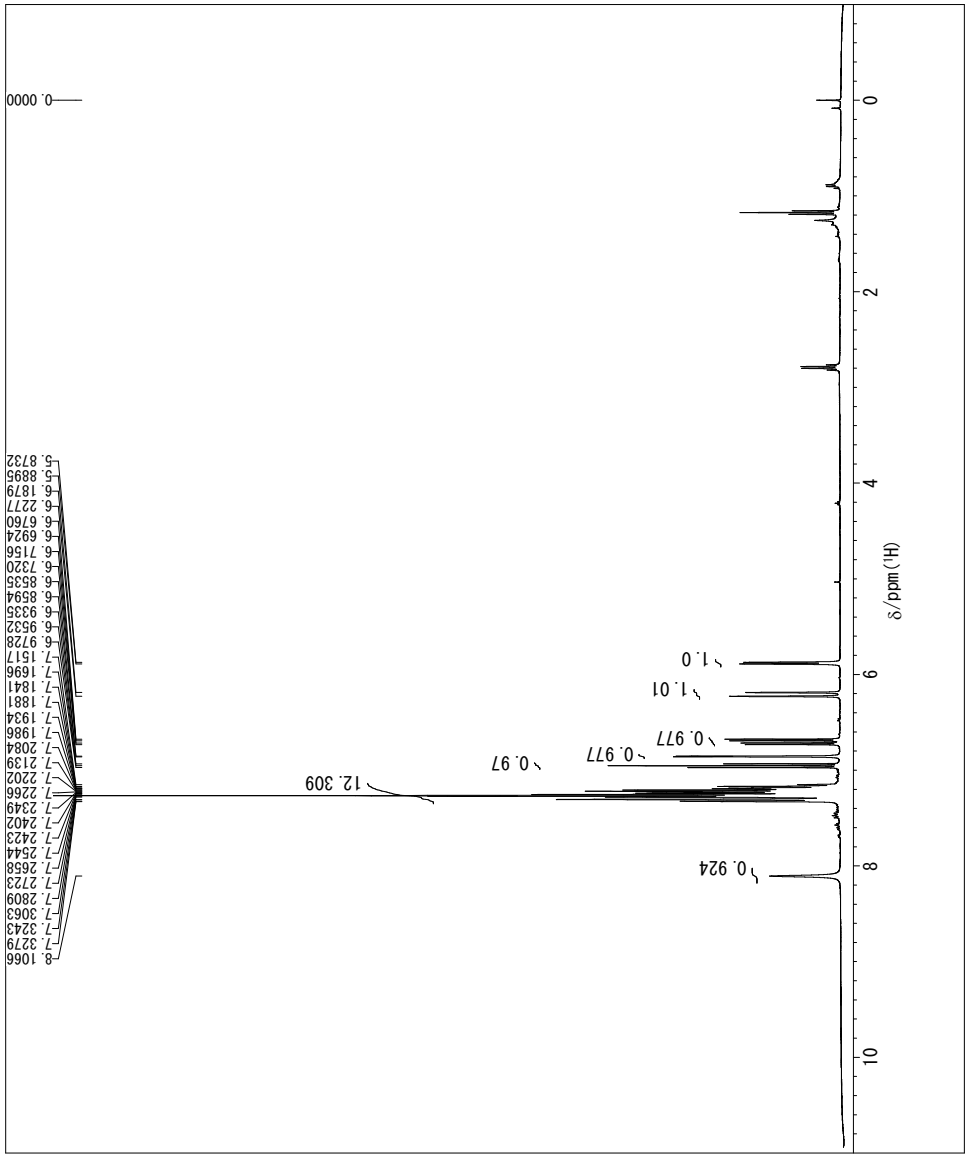



DFILF YKYOUSEI06-HDKYOUSEI06-HD  
 ¥2022年度¥2¥高谷¥修論¥帰属¥  
 一夕¥NMR¥基質檢討(CYCLOHEX, TH  
 F, CS2C03) ¥4-BR (EXP79) ¥23652C  
 ¥1¥fid  
 ORGFILF YKYOUSEI06-HDKYOUSEI06-  
 HD¥2022年度¥2¥高谷¥修論¥帰属¥  
 一夕¥NMR¥基質檢討(CYCLOHEX,  
 THF, CS2C03) ¥4-BR (EXP79) ¥2365  
 2C¥1¥fid  
 DATIM 26/May/2022 19:08:28  
 COMNT

OBNUC <sup>13</sup>C  
 EXMOD ZGPC30>  
 OFR 100.61 MHz  
 OBSSET 0.0 kHz  
 OBFIN 12705.91 Hz  
 POINT 131072(ZeroFill  
 :x4)  
 FREQU 32051.28 Hz  
 SCANS 256  
 ACQTM 1.0224 s  
 PD 2.0 s  
 PWL 9.0 µs  
 SLVNT 21.01 °C  
 EXREF CDCl<sub>3</sub>>  
 BF 77.0 ppm  
 RGAIN 0.9781 Hz  
 2050  
 PRNT\_DATE 2022/Dec/14 20:41:15

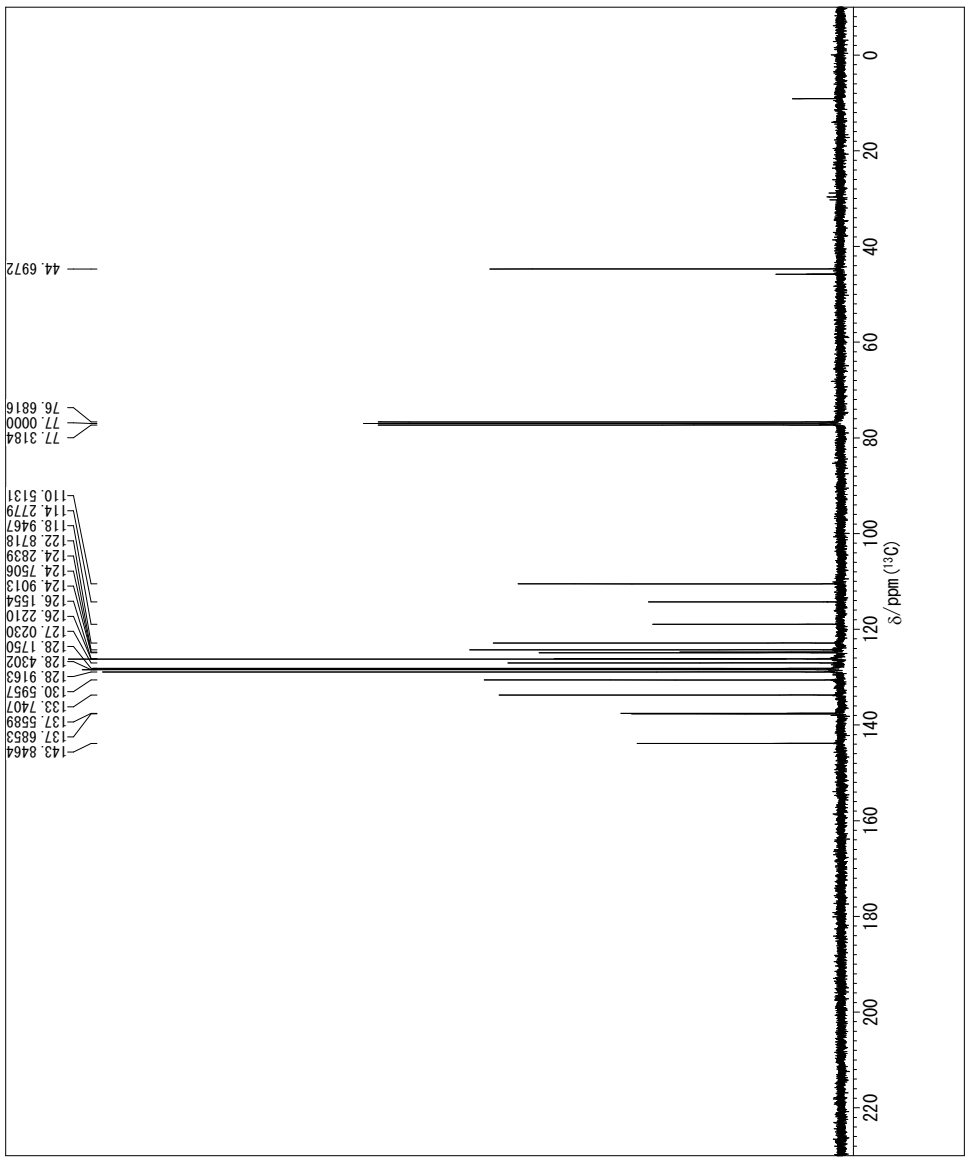

# クロマトグラム

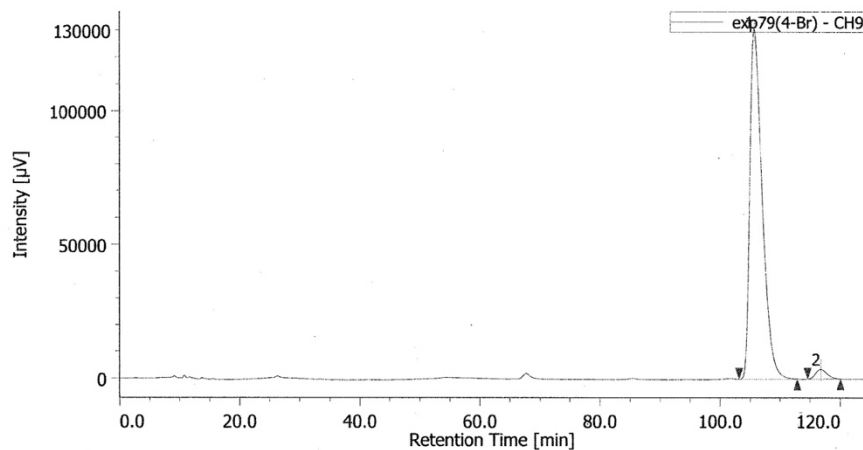

**クロマトグラム情報**  
 ユーザー名 3385  
 更新日時 2022/05/27 13:42:21  
 コメント IA,0.5ml/min,Hex:EtOH=99:1,254nm  
 HPLC システム名 HPLC-1  
 測定日 2022/05/27 11:33:19  
 注入量 1.00 [μL]  
 サンプル# 1  
 プロジェクト名 2019system1  
 取込時間 180.0 [min]  
 測定シーケンス 1-02035 takaya  
 コントロールメソッド 2019system1  
 ピークIDテーブル  
 検量線テーブル  
 追加情報

**チャンネル情報+ピーク情報**  
 クロマトグラム名 exp79(4-Br)-CH9  
 サンプル名  
 チャンネル名 254.0nm  
 サンプル間隔 200 [msec]  
 波形処理メソッド (マニュアル)

| # | ピーク名    | CH | tR [min] | Area [μV·sec] | Height [μV] | Area%  | Height% |
|---|---------|----|----------|---------------|-------------|--------|---------|
| 1 | Unknown | 9  | 105.69   | 18715941      | 130537      | 97.518 | 97.314  |
| 2 | Unknown | 9  | 116.81   | 476355        | 3604        | 2.482  | 2.686   |

Chiral phase HPLC chart of (±)-4k

クロマトグラム

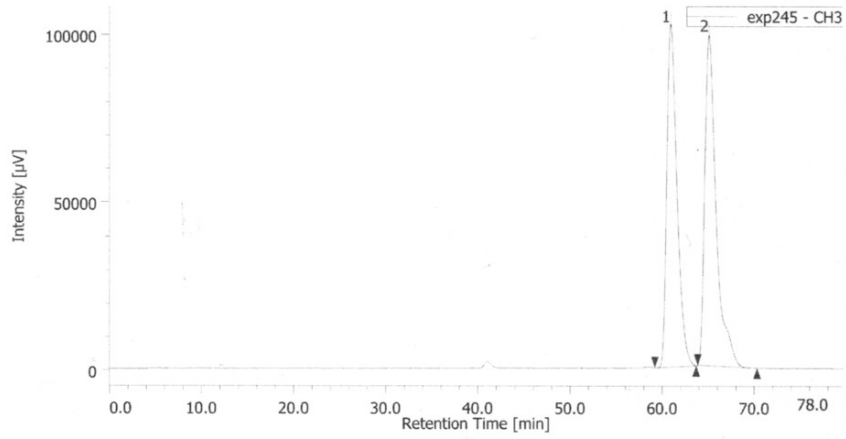

**クロマトグラム情報**  
 ユーザー名 3385  
 更新日時 2014/07/01 14:51:17  
 コメント IA-3,0.7, Hex:EtOH=99:1  
 HPLC システム名 HPLC-1  
 測定日 2014/07/01 13:31:41  
 注入量 1.00 [μL]  
 サンプル# 1  
 プロジェクト名 2012system1  
 取込時間 180.0 [min]  
 測定シーケンス 1.2696 asano  
 コントロールメソッド 2009system1\_温度制御なし\_600min  
 ピークIDテーブル  
 検量線テーブル  
 追加情報

**チャンネル情報+ピーク情報**  
 クロマトグラム名 exp245-CH3  
 サンプル名 4-Br  
 チャンネル名 UV-2075  
 サンプル間隔 500 [msec]  
 波形処理メソッド (マニュアル)

| # | ピーク名    | CH | IR [min] | 面積 [μV·sec] | 高さ [μV] | 面積%    | 高さ%    | 定置値 | NTP   | 分離度   | シメトリー係数 | 警告    |
|---|---------|----|----------|-------------|---------|--------|--------|-----|-------|-------|---------|-------|
| 1 | Unknown | 3  | 60.917   | 7827300     | 102143  | 48.315 | 50.929 | N/A | 15127 | 2.060 |         | 1.503 |
| 2 | Unknown | 3  | 65.050   | 8373098     | 98417   | 51.685 | 49.071 | N/A | 16219 | N/A   |         | 1.917 |

<sup>1</sup>H and <sup>13</sup>C NMR, and chiral phase HPLC chart of (*S*)-**41**

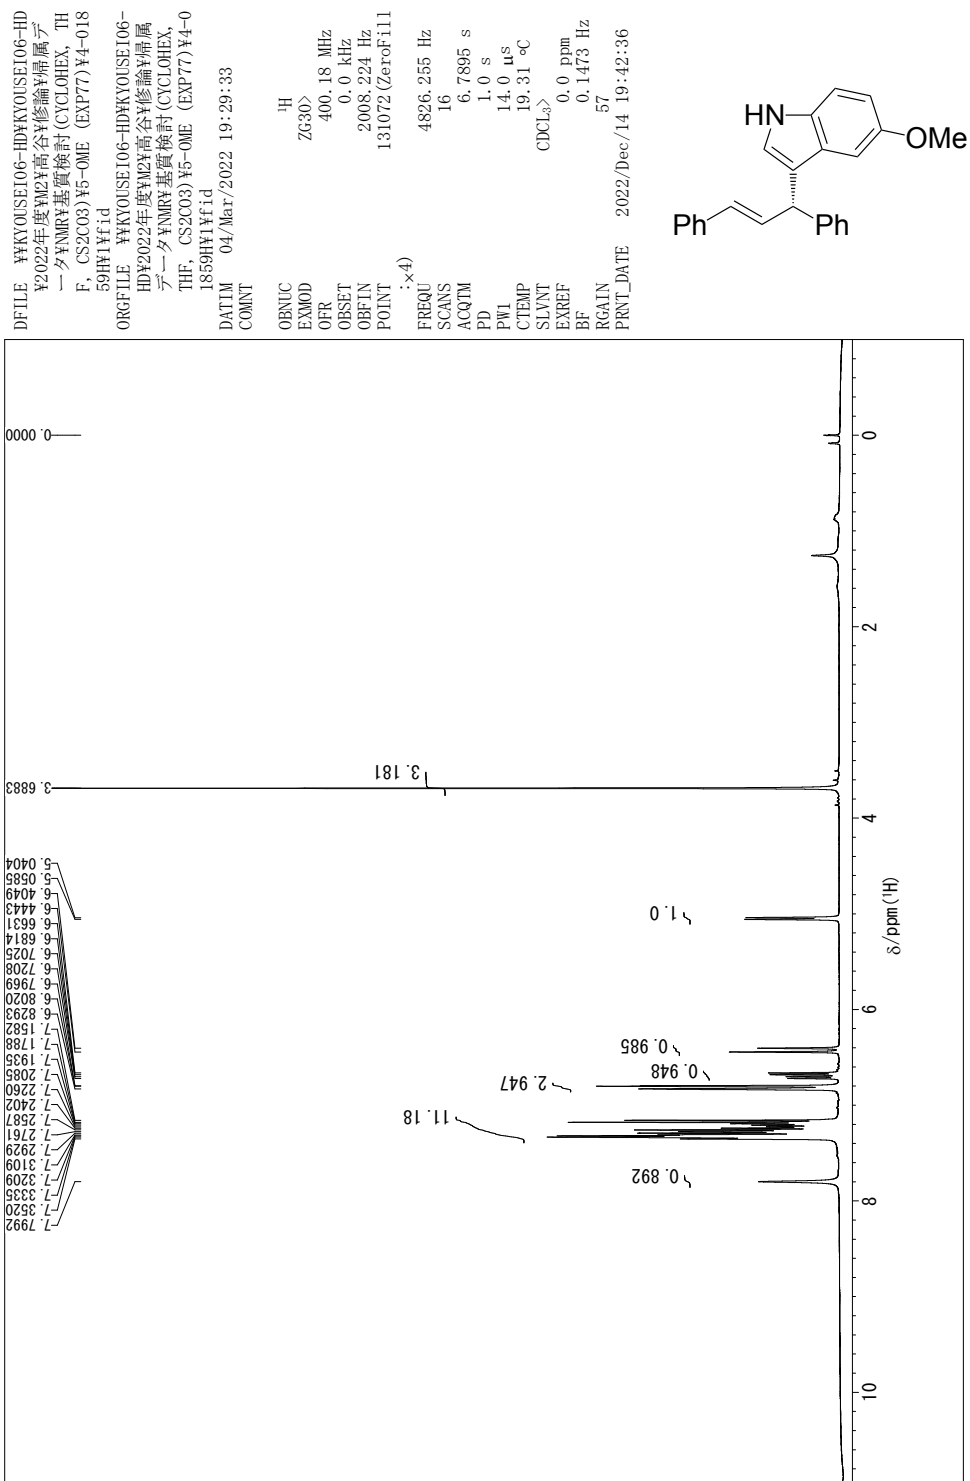

DFILE YKYOUSEI06-HDKYOUSEI06-HD  
 ¥2022年度¥M2¥高谷¥修論¥附属¥  
 一夕¥NMR¥基質検討(CYCLOHEX, TH  
 F, CS2C03) ¥5-OME (EXP77) ¥4-018  
 59C¥H¥fid  
 ORGFILE YKYOUSEI06-HDKYOUSEI06-  
 HD¥2022年度¥M2¥高谷¥修論¥附属¥  
 一夕¥NMR¥基質検討(CYCLOHEX,  
 TH, CS2C03) ¥5-OME (EXP77) ¥4-0  
 1859C¥H¥fid  
 DATIM 04/Mar/2022 19:45:08  
 COMNT

OBNUC <sup>13</sup>C  
 EXMOD ZGPC30>  
 OFR 100.63 MHz  
 OBSSET 0.0 kHz  
 OBFIN 11066.5 Hz  
 POINT 131072(ZeroFill  
 :x4)  
 FREQU 24038.46 Hz  
 SCANS 256  
 ACQTM 1.3631 s  
 PD 2.0 s  
 PWL 10.0 µs  
 CTEMP 20.11 °C  
 SLVNT CDCl<sub>2</sub>>  
 EXREF 77.0 ppm  
 BF 0.7336 Hz  
 RGAIN 203  
 PRNT\_DATE 2022/Dec/14 19:50:21

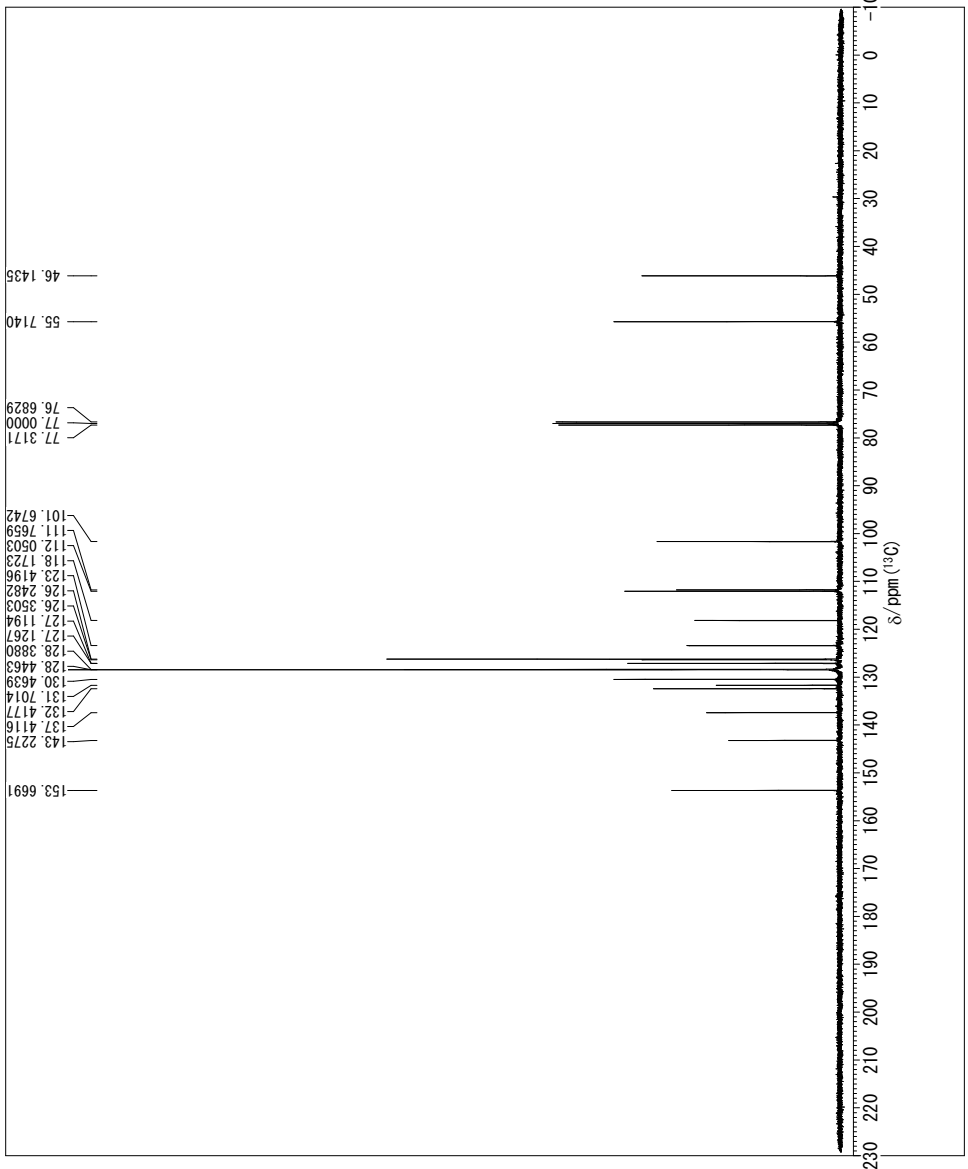

# クロマトグラム

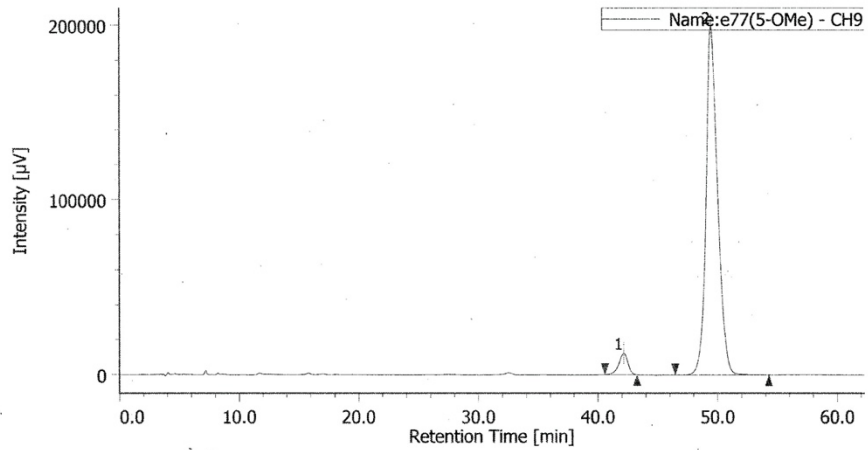

**クロマトグラム情報**  
 ユーザー名 3385  
 更新日時 2022/03/07 17:22:25  
 コメント IB,0.9ml/min,Hex:EtOH=99:1  
 HPLC システム名 HPLC-2  
 測定日 2022/03/07 15:21:32  
 注入量 1.00 [μL]  
 サンプル# 1  
 プロジェクト名 2019system2  
 取込時間 180.0 [min]  
 測定シーケンス 2\_466666 takaya  
 コントロールメソッド system2\_2019  
 ピークIDテーブル  
 検量線テーブル  
 追加情報

**チャンネル情報+ピーク情報**  
 クロマトグラム名 e77(5-OMe)-CH9  
 サンプル名  
 チャンネル名 256.0nm  
 サンプルング間隔 200 [msec]  
 波形処理メソッド (マニュアル)

| # | ピーク名    | CH | tR [min] | Area [μVsec] | Height [μV] | Area%  | Height% |
|---|---------|----|----------|--------------|-------------|--------|---------|
| 1 | Unknown | 9  | 42.12    | 631750       | 12203       | 4.487  | 5.755   |
| 2 | Unknown | 9  | 49.45    | 13446883     | 199853      | 95.513 | 94.245  |

Chiral phase HPLC chart of (±)-41

クロマトグラム

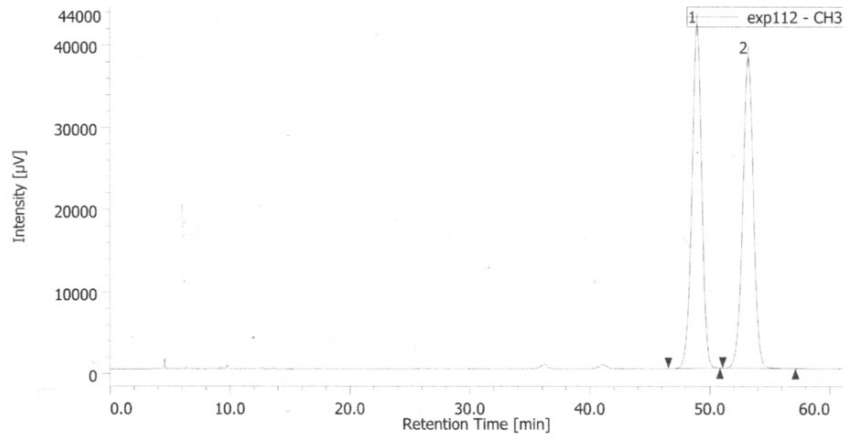

**クロマトグラム情報**  
 ユーザー名 3385  
 更新日時 2011/09/22 18:15:38  
 コメント IB,flow0.9,Hex:EtOH=99:1  
 HPLC システム名 HPLC-1  
 測定日 2011/09/22 17:14:31  
 注入量 1.00 [μL]  
 サンプル# 1  
 プロジェクト名 2009system1  
 取込時間 600.0 [min]  
 測定シーケンス 1\_0904 ishikawa  
 コントロールメソッド 2009system1\_温度制御なし\_600min  
 ピークIDテーブル  
 検量線テーブル  
 追加情報

**チャンネル情報+ピーク情報**  
 クロマトグラム名 exp112-CH3  
 サンプル名 5-Br indole  
 チャンネル名 UV-2075  
 サンプル間隔 500 [msec]  
 波形処理メソッド (マニュアル)

| # | ピーク名    | CH | TR [min] | 面積 [μV·sec] | 高さ [μV] | 面積%    | 高さ%    | 定量値 | NTP   | 分離度   | シンメトリー係数 | 警告 |
|---|---------|----|----------|-------------|---------|--------|--------|-----|-------|-------|----------|----|
| 1 | Unknown | 3  | 48.925   | 2375311     | 41835   | 49.941 | 52.489 | N/A | 17744 | 2.757 | 0.941    |    |
| 2 | Unknown | 3  | 53.175   | 2380899     | 37867   | 50.059 | 47.511 | N/A | 17189 | N/A   | 0.983    |    |

<sup>1</sup>H and <sup>13</sup>C NMR, and chiral phase HPLC chart of (*S*)-**4m**

DFILE YKYOU106-HDKYOU106-HD  
 Y2022年度YMZ高谷修論帰属予  
 一夕YMRV基質検討(CYCLOHEX, TH  
 F, CS2C03)Y2-PH (EXP78)Y4-0185  
 SHYIFid  
 ORGFILE YKYOU106-HDKYOU106-  
 HDY2022年度YMZ高谷修論帰属  
 一夕YMRV基質検討(CYCLOHEX,  
 THF, CS2C03)Y2-PH (EXP78)Y4-01  
 858HYIFid  
 DATIM 04/Mar/2022 19:06:15  
 COMNT  
 OBNIC <sup>1</sup>H  
 EXMOD ZG30>  
 OFR 400.18 MHz  
 OBSET 0.0 kHz  
 OBFIN 2008.224 Hz  
 POINT 131072(Zerofill  
 :x4)  
 FREQU 4826.255 Hz  
 SCANS 16  
 ACQTM 6.7895 s  
 PD 1.0 s  
 PWI 14.0 μs  
 CTEMP 19.31 °C  
 SLVNT CDCl<sub>3</sub>>  
 EXREF 0.0 ppm  
 BF 0.1473 Hz  
 RGAIN 57  
 PRNT\_DATE 2022/Dec/14 21:06:11

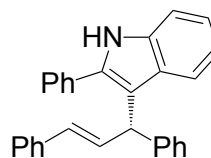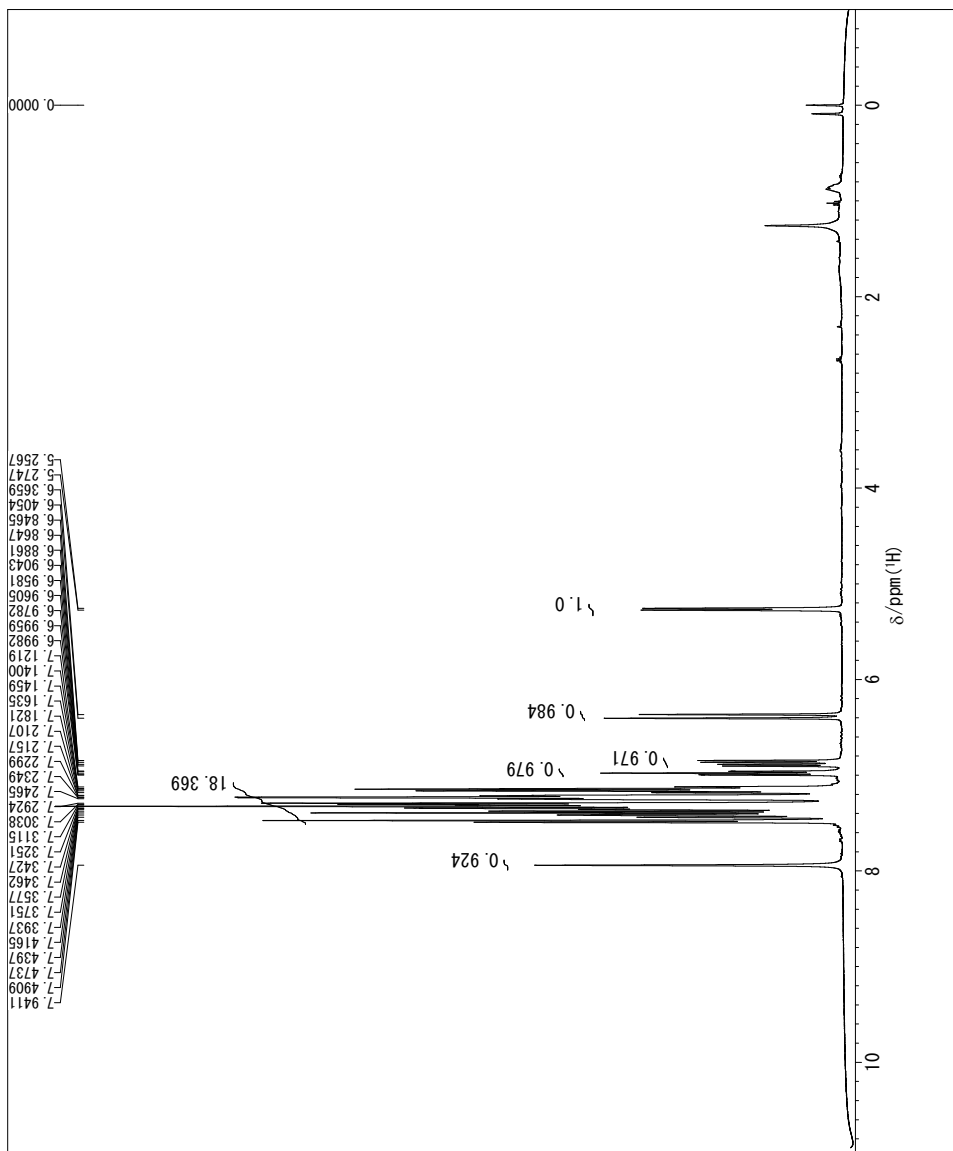



DFILE YKYOUSEI06-HDKYOUSEI06-HD  
 Y2022年度W2Y高谷修論Y帰属予  
 一夕NMRY基質検討(CYCLOHEX, TH  
 F, CS2C03) Y2-PH (EXP78) Y4-0185  
 8CHYfid  
 ORGFILE YKYOUSEI06-HDKYOUSEI06-  
 HDY2022年度W2Y高谷修論Y帰属  
 予一夕NMRY基質検討(CYCLOHEX,  
 TH, CS2C03) Y2-PH (EXP78) Y4-01  
 858CF1Yfid  
 DATIM 04/Mar/2022 19:23:17  
 COMNT

<sup>13</sup>C  
 ZGPC30>  
 100.63 MHz  
 0.0 kHz  
 11066.5 Hz  
 131072(ZeroFill  
 :x4)  
 24038.46 Hz  
 256  
 1.3631 s  
 2.0 s  
 10.0  $\mu$ s  
 20.11  $^{\circ}$ C  
 CDCl<sub>2</sub>>  
 77.0 ppm  
 0.7336 Hz  
 203  
 PRNT\_DATE 2022/Dec/14 21:16:54

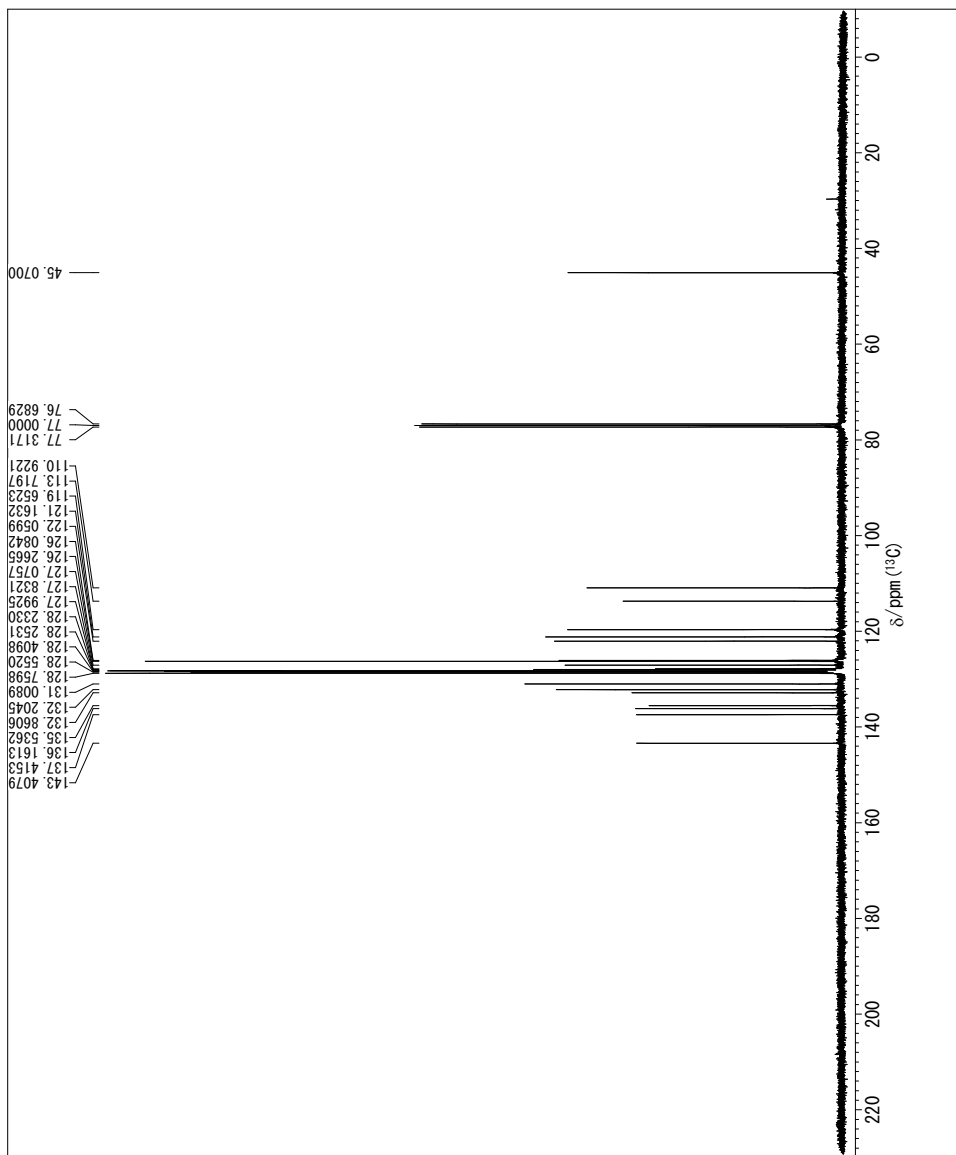

# クロマトグラム

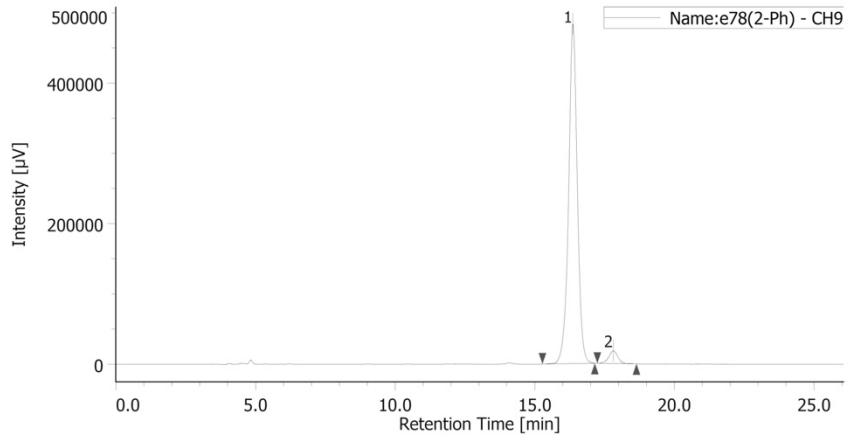

**クロマトグラム情報**  
 ユーザー名 3385  
 更新日時 2022/03/07 17:22:26  
 コメント IB,0.9ml/min,Hex:EtOH=99:1  
 HPLC システム名 HPLC-2  
 測定日 2022/03/07 16:28:02  
 注入量 1.00 [μL]  
 サンプル# 1  
 プロジェクト名 2019system2  
 取込時間 180.0 [min]  
 測定シーケンス 2.466667 takaya  
 コントロールメソッド system2\_2019  
 ピークIDテーブル  
 検量線テーブル  
 追加情報

**チャンネル情報 + ピーク情報**  
 クロマトグラム名 e78(2-Ph)-CH9  
 サンプル名  
 チャンネル名 256.0nm  
 サンプルング間隔 200 [msec]  
 波形処理メソッド (マニュアル)

| # | ピーク名    | CH | tR [min] | Area [μV·sec] | Height [μV] | Area%  | Height% |
|---|---------|----|----------|---------------|-------------|--------|---------|
| 1 | Unknown | 9  | 16.36    | 10459524      | 482871      | 96.152 | 96.362  |
| 2 | Unknown | 9  | 17.81    | 418567        | 18231       | 3.848  | 3.638   |

Chiral phase HPLC chart of (±)-4m

クロマトグラム

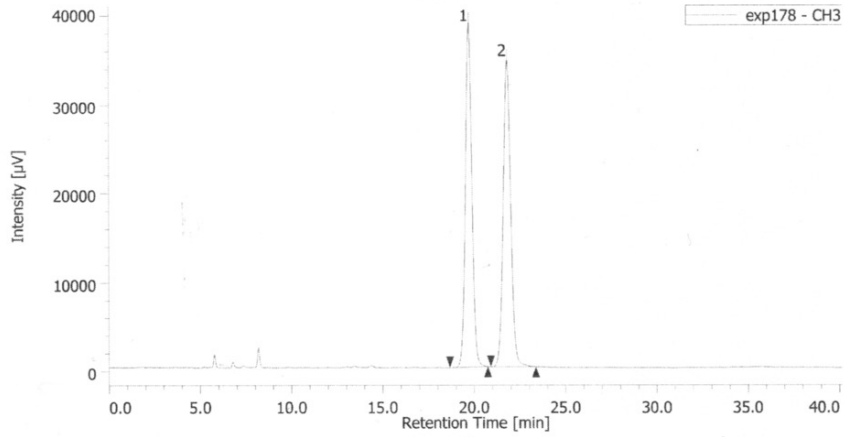

**クロマトグラム情報**  
 ユーザー名 3385  
 更新日時 2012/07/23 13:23:51  
 コメント IB,flow0.9,Hex:EtOH=99:1  
 HPLC システム名 HPLC-1  
 測定日 2012/07/23 12:43:40  
 注入量 1.00 [μL]  
 サンプル# 1  
 プロジェクト名 2012system1  
 取込時間 600.0 [min]  
 測定シーケンス 1\_1551 ishikawa  
 コントロールメソッド 2009system1\_温度制御なし\_600min  
 ピークIDテーブル  
 検量線テーブル  
 追加情報

**チャンネル情報+ピーク情報**  
 クロマトグラム名 exp178-CH3  
 サンプル名 2-Ph(rac)  
 チャンネル名 UV-2075  
 サンプリング間隔 500 [msec]  
 波形処理メソッド (マニュアル)

| # | ピーク名    | CH | trR [min] | 面積 [μVsec] | 高さ [μV] | 面積%    | 高さ%    | 定量値 | NTP   | 分離度   | シノメトリー係数 | 警告    |
|---|---------|----|-----------|------------|---------|--------|--------|-----|-------|-------|----------|-------|
| 1 | Unknown | 3  | 19.717    | 957849     | 36698   | 49.721 | 52.846 | N/A | 15314 | 3.084 |          | 1.014 |
| 2 | Unknown | 3  | 21.800    | 968612     | 34530   | 50.279 | 47.154 | N/A | 14782 | N/A   |          | 1.041 |
